# Supplementary material
Source: publisher site journal article supplement (https://www.dovepress.com/get_supplementary_file.php?f=280434.xlsx)
Supplement: Supplementary file 1 [file get_supplementary_file.php]

## Sheet: Sheet1
Supplementary Table S5. CircRNA-seq raw data table.
Accession	PC1_PC_fpkm	PC2_PC_fpkm	PC3_PC_fpkm	PC4_PC_fpkm	PC5_PC_fpkm	ccRCC1_ccRCC_fpkm	ccRCC2_ccRCC_fpkm	ccRCC3_ccRCC_fpkm	ccRCC4_ccRCC_fpkm	ccRCC5_ccRCC_fpkm	mean_fpkm_ccRCC	mean_fpkm_PC	regulation	log2fold_change	pvalue	FDR	significant	chr	start	end	strand
circRNA1	5.29995	0	6.02972	6.35172	5.11682	5.08665	0.0315412	2.27896	6.93648	8.16329	4.49939	4.55964	down	-0.0191927	0.975424	0.984406	no	chrY	2953909	2961646	+
circRNA10	2.53956	3.17993	3.04058	2.69575	2.85914	3.14977	3.36774	3.70258	4.66334	4.25498	3.82768	2.86299	up	0.418947	0.0223649	0.0996867	no	chrX	10063445	10079804	+
circRNA100	30.1085	50.1625	47.2659	18.3263	18.8971	7.37217	6.43469	7.64924	19.2179	7.33702	9.60221	32.9521	down	-1.77893	0.02291	0.100746	yes	chr13	75713182	75761038	+
circRNA1000	6.65638	6.22284	8.73754	11.1181	10.0097	6.71881	11.4253	13.0295	8.89891	8.17025	9.64854	8.54892	up	0.174569	0.478836	0.618677	no	chr20	32366384	32369123	+
circRNA10000	11.4078	21.6372	15.4996	10.5311	13.2692	12.4639	7.60342	8.74506	11.5374	14.943	11.0586	14.469	down	-0.3878	0.195411	0.339633	no	chr1	148961837	148962640	+
circRNA10001	5.28336	6.67407	7.88204	6.1127	5.20855	8.64359	5.17636	7.85696	5.80725	7.32845	6.96252	6.23215	up	0.159881	0.395984	0.544473	no	chr1	150497530	150499293	+
circRNA10002	7.96326	7.54889	8.2009	8.82054	7.09489	14.0518	9.38346	12.9101	12.8406	10.6522	11.9676	7.92569	up	0.594528	0.0065792	0.0596858	no	chr1	150661814	150663763	-
circRNA10003	4.07331	2.62332	3.56449	4.66859	13.3639	108.439	48.7448	39.9189	10.61	81.3135	57.8053	5.65873	up	3.35265	0.036512	0.126324	yes	chr1	150747777	150757980	-
circRNA10004	1.49349	2.27788	1.93695	1.78661	1.53834	1.45208	1.15975	1.80422	2.12588	1.18412	1.54521	1.80665	down	-0.225516	0.299641	0.452001	no	chr1	151024611	151027327	+
circRNA10005	6.33713	7.02992	7.38085	5.36166	5.61231	3.79004	5.20384	5.08949	6.70722	4.05541	4.9692	6.34437	down	-0.352464	0.0686369	0.175093	no	chr1	151423397	151425061	-
circRNA10006	6.65556	8.03092	8.39473	6.4763	6.97475	5.07369	6.27722	6.12155	8.32016	5.73438	6.3054	7.30645	down	-0.212582	0.175443	0.316335	no	chr1	151423397	151429711	-
circRNA10007	1.84743	1.56673	1.48443	1.76469	1.60821	2.6709	1.92485	2.79699	2.1292	3.33803	2.57199	1.6543	up	0.636666	0.0194998	0.0930094	no	chr1	151638888	151639119	+
circRNA10008	5.63184	5.77877	6.20147	6.01847	6.63523	6.34668	6.83084	6.97595	5.73057	8.14902	6.80661	6.05316	up	0.169249	0.139947	0.271825	no	chr1	151638888	151668635	+
circRNA10009	7.54533	9.48279	9.13317	8.28863	8.96379	9.83013	10.5368	12.1843	7.84354	10.7469	10.2283	8.68274	up	0.236348	0.0991139	0.217209	no	chr1	151658235	151693483	+
circRNA1001	3.20688	1.59055	1.88439	3.15301	2.82015	0.999945	1.58459	1.46778	3.50811	1.92647	1.89738	2.531	down	-0.415696	0.279415	0.430633	no	chr20	32784758	32792770	+
circRNA10010	6.80191	7.30331	6.62152	5.35681	7.54014	6.01915	7.13518	5.72127	6.30102	5.80785	6.19689	6.72474	down	-0.117932	0.286585	0.437955	no	chr1	153811731	153819735	-
circRNA10011	9.89671	10.9764	12.4789	11.8849	12.4883	12.3923	13.1631	13.4451	12.9944	12.3998	12.8789	11.545	up	0.157743	0.0525201	0.151336	no	chr1	154234591	154246375	+
circRNA10012	9.1369	7.47618	10.6074	8.5996	7.36224	9.61146	10.8286	9.72515	11.8318	8.31322	10.062	8.63647	up	0.220409	0.129147	0.25832	no	chr1	155346383	155347904	-
circRNA10013	5.54698	6.72312	6.53418	5.7393	7.33088	6.15762	7.85401	7.06352	6.46877	7.44069	6.99692	6.37489	up	0.13432	0.205332	0.350899	no	chr1	155360301	155395553	-
circRNA10014	6.24139	6.72497	7.59739	6.62824	5.74647	8.86215	5.78462	6.97952	6.77264	7.10454	7.10069	6.58769	up	0.108187	0.410487	0.557928	no	chr1	155717006	155721618	+
circRNA10015	3.97889	4.62525	3.52578	3.5658	4.35394	3.58151	3.7801	3.45159	3.3483	4.67328	3.76696	4.00993	down	-0.0901786	0.47094	0.611358	no	chr1	155762190	155766709	-
circRNA10016	2.30777	2.90218	2.67932	2.59401	2.9782	2.40271	2.81341	2.50762	2.22259	3.25003	2.63927	2.6923	down	-0.0286979	0.81325	0.878892	no	chr1	155767425	155777820	-
circRNA10017	6.3952	4.71485	4.66088	6.63431	3.32083	13.653	14.836	10.7891	11.7967	10.8051	12.376	5.14521	up	1.26624	0.000137611	0.0309996	yes	chr1	155904311	155904804	-
circRNA10018	3.68858	3.51803	2.94761	3.25419	2.88768	2.33872	2.30057	2.23152	3.68465	3.5566	2.82241	3.25922	down	-0.207597	0.275295	0.425711	no	chr1	155925632	155927156	-
circRNA10019	6.13466	6.17559	5.59028	8.4859	4.01966	5.1519	4.41934	2.35394	4.16554	4.94986	4.20812	6.08122	down	-0.531186	0.0681973	0.174538	no	chr1	156199835	156200472	+
circRNA1002	2.33696	2.74186	2.51705	1.92188	2.16022	1.91813	2.7328	3.17218	2.13487	2.14664	2.42093	2.3356	up	0.0517691	0.762747	0.843491	no	chr20	33619517	33623296	+
circRNA10020	39.4809	44.8823	42.9239	45.3511	32.9778	30.3907	38.1786	36.4544	44.7077	29.8416	35.9146	41.1232	down	-0.195381	0.18352	0.325703	no	chr1	160224442	160225663	-
circRNA10021	5.94648	7.53872	5.51897	6.37159	7.20053	5.45206	6.31756	10.3141	6.30849	6.85755	7.04996	6.51526	up	0.113793	0.586736	0.708987	no	chr1	161168993	161170024	+
circRNA10022	14.706	15.8784	16.9025	18.0345	20.586	19.687	18.1978	17.1921	18.7545	21.7735	19.121	17.2215	up	0.150946	0.175588	0.316534	no	chr1	161802052	161821161	+
circRNA10023	18.8572	20.1902	20.2276	21.0337	17.8444	9.56291	14.1458	3.59749	19.0803	4.26084	10.1295	19.6306	down	-0.954546	0.0307707	0.11663	no	chr1	164792494	164821626	+
circRNA10024	18.2343	15.8658	20.9047	21.0641	13.6213	17.6329	19.7289	13.7721	11.511	13.0105	15.1311	17.938	down	-0.245505	0.218793	0.366228	no	chr1	165679442	165683110	-
circRNA10025	60.9591	73.5207	68.3959	79.4499	88.684	80.7242	93.2737	102.002	87.1605	72.15	87.0621	74.2019	up	0.230588	0.102413	0.222043	no	chr1	167303474	167332535	+
circRNA10026	7.56458	10.8277	12.8098	6.63139	8.26347	10.4963	13.3666	15.2565	14.6191	10.1584	12.7794	9.2194	up	0.471071	0.0504146	0.148023	no	chr1	167376029	167389761	+
circRNA10027	11.4675	16.8732	13.9157	13.3104	17.3933	13.7062	17.293	16.7848	17.6689	13.0608	15.7027	14.592	up	0.105837	0.473125	0.613316	no	chr1	168038371	168045227	+
circRNA10028	1.25651	1.76233	1.43447	1.294	1.08799	1.67167	1.54388	1.87026	2.13431	2.1677	1.87756	1.36706	up	0.457784	0.0159448	0.0846416	no	chr1	169323117	169324500	-
circRNA10029	4.83156	5.11231	4.6376	4.94085	5.99744	5.62762	5.76752	7.11728	5.53017	6.64533	6.13758	5.10395	up	0.266056	0.0324341	0.119725	no	chr1	170016462	170024596	-
circRNA1003	3.55974	3.44296	4.02505	2.69749	3.40285	3.13727	3.297	4.72981	2.82585	3.07998	3.41398	3.42562	down	-0.00490826	0.977593	0.985569	no	chr20	33619517	33628435	+
circRNA10030	6.08006	5.30594	5.62417	5.76407	7.59837	5.80606	8.04427	7.9916	7.69393	6.79856	7.26689	6.07452	up	0.258567	0.07661	0.186568	no	chr1	170024418	170055436	-
circRNA10031	3.28149	4.38466	4.73484	3.31732	4.13352	5.20246	5.0697	3.59813	6.16595	5.43201	5.09365	3.97037	up	0.359428	0.0627668	0.166748	no	chr1	170542491	170544845	+
circRNA10032	7.1085	6.7226	6.65315	8.92103	9.3101	7.30002	8.97585	6.89861	9.39627	6.96237	7.90662	7.74308	up	0.0301549	0.838828	0.895334	no	chr1	172551512	172591071	+
circRNA10033	2.65801	2.95964	2.3794	3.2317	2.27959	3.29457	3.75846	3.39452	3.79138	3.20532	3.48885	2.70167	up	0.368901	0.00793208	0.0628517	no	chr1	173755923	173757159	+
circRNA10034	5.22169	6.07683	4.95451	5.13604	7.42168	6.86066	6.67561	5.55388	6.81983	5.30225	6.24245	5.76215	up	0.115505	0.424409	0.570298	no	chr1	173941265	173943588	-
circRNA10035	4.35951	4.48951	4.40221	3.39515	4.32242	4.77084	4.62238	4.10183	5.34747	4.46223	4.66095	4.19376	up	0.15238	0.142461	0.275322	no	chr1	173961077	173964187	-
circRNA10036	19.83	17.9305	15.2029	28.6421	28.1648	14.1974	18.7128	14.7553	16.878	22.07	17.3227	21.9541	down	-0.341825	0.183897	0.326072	no	chr1	174219125	174231355	+
circRNA10037	3.82072	3.84978	1.97084	4.28311	6.4269	0.0596264	0.862401	0.0931323	1.25891	0.0548673	0.465788	4.07027	down	-3.12738	0.00502566	0.054643	yes	chr1	176702607	176800132	+
circRNA10038	5.08832	6.95274	7.55479	6.05187	6.63327	5.67976	9.10617	7.75763	11.4541	6.64555	8.12864	6.4562	up	0.332328	0.18263	0.324571	no	chr1	178456721	178467421	+
circRNA10039	1.01035	0.454331	0.768966	0.573335	0.937332	3.62927	2.44214	2.04525	1.21519	2.8606	2.43849	0.748864	up	1.70321	0.0118812	0.0738848	yes	chr1	179131311	179131481	-
circRNA1004	6.76862	7.91218	9.27745	11.0119	12.2918	8.55386	10.5292	9.99363	9.23512	10.489	9.76016	9.45238	up	0.0462274	0.785366	0.859626	no	chr20	34408651	34413879	+
circRNA10040	1.5668	1.12698	1.54902	1.5581	2.71564	4.54519	2.55334	2.41655	1.90882	4.49898	3.18458	1.70331	up	0.902761	0.0551063	0.154812	no	chr1	179339438	179343635	+
circRNA10041	7.18423	9.90668	12.299	9.26586	10.048	10.9167	11.4551	12.6678	14.8781	8.00279	11.5841	9.74076	up	0.250037	0.225252	0.373298	no	chr1	179865436	179865854	-
circRNA10042	2.20143	2.37425	2.67422	2.87864	3.49944	2.70651	3.13899	3.0397	3.1644	2.95433	3.00079	2.7256	up	0.138768	0.304338	0.456968	no	chr1	179986169	179992221	+
circRNA10043	1.04507	1.51085	1.33768	1.33172	1.55459	1.34669	1.71574	1.72139	1.78886	1.72075	1.65869	1.35598	up	0.290703	0.0356946	0.125132	no	chr1	179992062	179997175	+
circRNA10044	1.21752	1.63225	1.59158	1.32651	1.61476	1.57899	1.6905	1.6512	1.77631	1.61413	1.66223	1.47652	up	0.170913	0.0970454	0.214307	no	chr1	180019949	180021009	+
circRNA10045	13.0439	10.1327	11.6431	11.3856	9.97322	7.5341	12.5024	11.6833	7.59492	11.9855	10.26	11.2357	down	-0.131052	0.462297	0.603634	no	chr1	180803388	180811488	+
circRNA10046	8.2391	10.4405	10.7215	8.61487	5.81803	6.7841	7.34	7.73561	5.89578	8.46434	7.24397	8.7668	down	-0.275271	0.174378	0.315057	no	chr1	180824753	180825344	+
circRNA10047	26.7147	29.8053	33.8357	33.5729	34.0497	22.2466	35.9655	30.5982	22.8431	33.5077	29.0322	31.5957	down	-0.122072	0.445034	0.588643	no	chr1	180834874	180873942	+
circRNA10048	8.5881	10.3654	9.07609	8.53221	11.6135	15.3726	12.7352	14.6202	11.5614	13.8212	13.6221	9.63505	up	0.499587	0.00228705	0.0452184	no	chr1	180984677	180993425	-
circRNA10049	8.753	8.99629	3.2015	8.95575	1.41427	4.73229	3.10719	8.47729	0.0229762	8.57077	4.9821	6.26416	down	-0.330367	0.594656	0.715691	no	chr1	181483744	181580776	+
circRNA1005	3.50551	3.56855	4.13777	3.95805	4.68631	3.75181	4.99752	5.62067	4.58707	4.37272	4.66596	3.97124	up	0.232585	0.108686	0.230796	no	chr20	34470048	34481206	+
circRNA10050	7.45463	8.08832	9.1581	8.80726	8.45645	9.8582	9.74447	7.74807	9.87974	7.98989	9.04407	8.39295	up	0.107794	0.288782	0.440261	no	chr1	182872337	182880608	+
circRNA10051	4.95821	5.32382	6.93473	5.85968	5.74034	6.72723	7.47523	5.48119	7.05135	5.35992	6.41898	5.76335	up	0.155437	0.261318	0.411577	no	chr1	182874854	182880608	+
circRNA10052	6.31632	6.9515	8.04068	6.92365	6.32802	6.9243	7.84454	6.4501	8.19548	5.91166	7.06522	6.91203	up	0.0316231	0.779912	0.855743	no	chr1	182880497	182883635	+
circRNA10053	3.44383	5.09179	5.51705	4.15719	5.51271	8.57553	11.9275	17.0562	18.3051	6.06672	12.3862	4.74451	up	1.3844	0.030635	0.116391	yes	chr1	183132400	183133550	+
circRNA10054	12.7984	12.5573	10.6015	17.2458	15.9645	22.6869	31.6532	26.8355	10.6346	22.6544	22.8929	13.8335	up	0.726735	0.0579314	0.15902	no	chr1	183880616	183900236	+
circRNA10055	2.8028	3.3834	2.95712	3.29904	3.74877	3.82946	4.28354	3.70229	3.47977	2.87271	3.63355	3.23823	up	0.166178	0.206154	0.35193	no	chr1	184706643	184711877	-
circRNA10056	3.6364	3.63052	4.53933	4.29278	3.94112	4.79178	5.39198	5.57134	7.29355	4.19768	5.44926	4.00803	up	0.443169	0.0478017	0.144461	no	chr1	185087552	185099962	+
circRNA10057	1.12441	1.3607	1.41722	1.44922	1.33502	1.06885	1.90429	2.07978	2.24647	1.63828	1.78753	1.33731	up	0.418634	0.0937039	0.210194	no	chr1	185202654	185222036	+
circRNA10058	2.49041	2.8234	3.17963	2.62499	2.48002	2.68095	5.38553	7.76221	9.0251	3.2395	5.61866	2.71969	up	1.04678	0.0785714	0.189596	no	chr1	185977787	186023153	+
circRNA10059	5.83006	9.18781	7.30272	7.45065	7.76217	7.18294	9.11051	11.5965	10.2144	11.1597	9.85281	7.50668	up	0.392359	0.0438281	0.138488	no	chr1	186325764	186327660	-
circRNA1006	8.19188	8.14732	10.8126	9.29646	11.7836	9.00836	12.2651	11.551	10.8592	11.1909	10.9749	9.64637	up	0.186154	0.182553	0.324517	no	chr20	34470048	34492597	+
circRNA10060	6.42679	7.34313	9.34765	7.7698	6.99213	7.50139	9.41585	9.6868	9.00076	9.92832	9.10663	7.5759	up	0.265499	0.0483096	0.145268	no	chr1	186398313	186406268	+
circRNA10061	12.4721	11.8543	13.5023	12.7801	11.5062	15.1337	13.6302	13.648	15.029	13.3387	14.1559	12.423	up	0.188392	0.0103183	0.0702658	no	chr1	193138085	193142066	+
circRNA10062	0.117715	0.0589832	0	0.0992437	0.340727	0.753286	1.64601	0.692442	0.32936	1.03715	0.891651	0.123334	up	2.85391	0.0226954	0.10028	yes	chr1	197117789	197125191	-
circRNA10063	2.13818	2.33093	3.47011	2.57642	2.82581	2.44374	3.53537	3.17667	2.94911	2.45358	2.91169	2.66829	up	0.125942	0.459461	0.601444	no	chr1	201857096	201858994	+
circRNA10064	15.0739	12.8119	13.3847	11.1858	14.4148	17.4062	14.8778	15.2685	12.7472	14.9792	15.0558	13.3742	up	0.170864	0.131599	0.261614	no	chr1	202001376	202003461	+
circRNA10065	5.45437	7.31289	5.36867	5.78881	6.53811	4.7311	6.02051	7.67929	5.62133	6.05773	6.02199	6.09257	down	-0.0168096	0.909983	0.942111	no	chr1	202427040	202449171	+
circRNA10066	5.9995	6.56407	4.44349	7.2804	11.2046	10.4748	15.1957	11.0285	13.5302	10.7314	12.1921	7.09841	up	0.78038	0.00871877	0.0647799	no	chr1	203707009	203709542	+
circRNA10067	12.0124	14.5608	11.1476	8.38828	13.4776	2.49505	7.9755	4.60317	10.7497	5.64536	6.29376	11.9173	down	-0.921069	0.0145639	0.0812835	no	chr1	204112915	204124857	+
circRNA10068	8.32876	10.3592	8.26311	7.85886	11.2876	5.13846	6.27987	4.82267	7.98151	6.38012	6.12053	9.21951	down	-0.591035	0.00809219	0.0632007	no	chr1	205169163	205187806	-
circRNA10069	45.1904	54.1735	81.9528	40.7474	32.3573	30.1926	33.8072	29.2274	33.1497	27.2679	30.729	50.8843	down	-0.727621	0.0768411	0.186875	no	chr1	205598455	205623891	-
circRNA1007	1.75576	2.27305	2.54402	2.05542	2.48396	1.63818	2.88061	2.98319	2.85588	1.64721	2.40102	2.22244	up	0.1115	0.621832	0.736664	no	chr20	34489266	34489926	+
circRNA10070	48.4745	50.2277	64.9425	56.2714	45.2859	48.71	54.2969	60.0009	106.969	50.3778	64.071	53.0404	up	0.27258	0.380881	0.529474	no	chr1	207757014	207767195	+
circRNA10071	6.10931	7.04375	9.38915	5.04496	6.14009	3.56806	4.47691	6.28712	6.58452	3.4692	4.87716	6.74545	down	-0.467873	0.0955013	0.212543	no	chr1	210400468	210418325	+
circRNA10072	23.9691	26.4038	32.3869	24.3116	30.3903	22.2256	29.4779	32.1455	31.7485	27.65	28.6495	27.4923	up	0.0594814	0.650445	0.759479	no	chr1	211271232	211289396	+
circRNA10073	50.7194	45.4218	34.2333	51.6837	51.0908	33.7514	30.437	38.4232	44.5652	32.1525	35.8659	46.6298	down	-0.37864	0.0341438	0.122227	no	chr1	212313767	212333598	+
circRNA10074	5.51159	6.0059	5.12968	7.45777	5.66443	5.26589	4.71262	6.44363	6.63098	3.90909	5.39244	5.95387	down	-0.14289	0.416714	0.563273	no	chr1	212329135	212333598	+
circRNA10075	2.42823	1.77659	1.47615	2.18716	1.8586	2.46778	3.16759	2.7126	2.61241	2.59271	2.71062	1.94535	up	0.478594	0.00673819	0.0603394	no	chr1	212872678	212889257	+
circRNA10076	3.92965	4.76666	4.00763	5.50476	6.16412	5.24335	5.76284	5.27336	5.29156	5.79262	5.47274	4.87456	up	0.166991	0.243921	0.393159	no	chr1	213077696	213129889	+
circRNA10077	1.07861	2.00205	3.04821	2.72071	2.70495	3.50888	4.05401	4.94941	4.48298	2.97971	3.995	2.31091	up	0.789736	0.00933165	0.0672499	no	chr1	220006106	220007338	-
circRNA10078	8.14715	9.55317	11.3684	9.20745	9.60321	10.0217	12.731	29.0185	11.9697	11.2593	15	9.57588	up	0.647489	0.200483	0.345191	no	chr1	220114314	220138043	+
circRNA10079	7.22565	6.46524	6.20079	9.73	7.98826	5.13266	9.55325	9.43754	11.8215	8.31962	8.85292	7.52199	up	0.235039	0.329328	0.480558	no	chr1	220212887	220213979	-
circRNA1008	13.7785	14.8441	14.3468	15.9829	17.4558	16.6711	16.8367	19.3961	16.36	16.4766	17.1481	15.2816	up	0.166249	0.0638734	0.168292	no	chr20	35716740	35725155	-
circRNA10080	9.90238	13.2205	14.1868	14.0558	7.43801	4.13136	11.9277	9.51886	21.6483	5.96026	10.6373	11.7607	down	-0.144841	0.749533	0.833437	no	chr1	220791491	220805274	+
circRNA10081	8.37651	8.06026	11.9505	9.04351	9.0538	7.90877	9.32883	10.3404	9.02618	8.40001	9.00084	9.29692	down	-0.0466936	0.724968	0.816501	no	chr1	222928430	222943332	+
circRNA10082	2.21501	4.94337	4.37231	2.09729	2.60999	3.6988	2.01003	4.31754	5.52072	3.0589	3.7212	3.24759	up	0.196396	0.585526	0.707894	no	chr1	223132475	223134864	-
circRNA10083	18.1622	22.2042	24.7332	24.0231	26.4802	30.1473	28.5985	30.3617	26.6875	27.553	28.6696	23.1206	up	0.310343	0.0131757	0.0774254	no	chr1	224393828	224399034	-
circRNA10084	12.1324	13.6834	15.6421	15.4381	15.2224	18.6338	16.0231	17.0911	14.6897	17.4193	16.7714	14.4237	up	0.217564	0.0377414	0.128414	no	chr1	224404430	224424654	-
circRNA10085	2.35005	2.78005	3.57823	2.62035	1.87958	1.0524	1.41124	2.4284	2.37021	0.999973	1.65245	2.64165	down	-0.676837	0.0465902	0.142664	no	chr1	225002783	225023865	+
circRNA10086	0.0529483	0.182767	0.252952	0.0925864	0.118983	0.0610502	0.123655	0.119267	0.149375	0.130493	0.116768	0.140047	down	-0.262267	0.567609	0.693522	no	chr1	225023615	225023865	+
circRNA10087	2.62631	2.85415	4.13396	2.86013	2.42626	1.16601	1.56716	3.24053	2.49112	1.37031	1.96703	2.98016	down	-0.599375	0.075972	0.18581	no	chr1	225038694	225159485	+
circRNA10088	1.6035	2.133	2.02719	2.31328	2.39279	0.839373	1.40071	2.24405	1.7069	1.20273	1.47875	2.09395	down	-0.501848	0.0636268	0.167897	no	chr1	225119220	225123614	+
circRNA10089	14.571	12.1183	9.68942	10.2809	8.56135	13.6666	10.11	15.285	6.88484	9.24489	11.0383	11.0442	down	-0.000773064	0.997536	0.998399	no	chr1	226961377	226965737	+
circRNA1009	6.51365	8.69533	7.52985	8.23687	8.8904	7.72246	7.99618	9.69437	8.31234	7.53436	8.25194	7.97322	up	0.0495712	0.643301	0.753207	no	chr20	35721740	35725155	-
circRNA10090	3.82883	4.13868	4.86039	4.00593	3.62742	1.8501	5.06761	3.03961	6.07719	1.97125	3.60115	4.09225	down	-0.184437	0.600203	0.719871	no	chr1	227016080	227035607	-
circRNA10091	11.9804	10.8569	12.9616	10.4666	11.5964	5.53152	13.7981	9.09541	17.0494	6.09419	10.3137	11.5724	down	-0.166121	0.607536	0.725655	no	chr1	227028657	227081017	-
circRNA10092	11.4722	11.9814	13.6276	10.8106	12.6614	4.98366	14.6328	9.65242	16.4383	7.97565	10.7366	12.1106	down	-0.173744	0.558135	0.686256	no	chr1	227193786	227213219	-
circRNA10093	3.47299	5.1192	2.97482	2.5381	4.26615	1.56759	4.25621	3.91789	4.37643	4.2013	3.66388	3.67425	down	-0.00407635	0.988591	0.992835	no	chr1	228213441	228288888	+
circRNA10094	4.33303	4.62995	4.45733	5.08815	5.63642	4.94073	5.80785	5.6919	6.56716	4.62763	5.52705	4.82898	up	0.194794	0.137381	0.268746	no	chr1	229466634	229498306	-
circRNA10095	4.16226	4.48893	4.59094	4.99778	5.55807	4.2624	6.53306	5.35986	6.81373	5.32574	5.65896	4.7596	up	0.249697	0.134058	0.264541	no	chr1	229489955	229498306	-
circRNA10096	3.8732	4.08791	4.09922	3.45057	4.9074	4.18013	5.28112	4.78328	4.30317	4.72457	4.65445	4.08366	up	0.188749	0.101518	0.220903	no	chr1	229530199	229542371	-
circRNA10097	11.5842	11.4614	12.9974	13.0335	15.3041	13.4684	18.7113	17.2484	15.3214	15.2948	16.0088	12.8761	up	0.314172	0.0264908	0.108126	no	chr1	231260507	231267903	+
circRNA10098	13.7554	17.7357	18.7787	12.8432	14.9681	27.3231	27.3258	35.222	30.9802	26.1453	29.3993	15.6162	up	0.912737	0.000236903	0.0346622	no	chr1	231370562	231374099	-
circRNA10099	8.75197	15.3396	15.637	13.7717	13.5525	14.5761	17.6337	17.0144	15.916	12.1162	15.4513	13.4105	up	0.204358	0.233952	0.38254	no	chr1	231537213	231542611	+
circRNA101	24.862	40.4792	41.0881	22.7088	18.9218	9.94025	10.9168	3.45205	48.2694	11.3499	16.7857	29.612	down	-0.818949	0.212034	0.358818	no	chr13	75823565	75853388	+
circRNA1010	2.65364	2.9985	2.55174	2.46885	3.67093	2.91197	3.70121	4.58422	3.98294	3.61708	3.75948	2.86873	up	0.390121	0.0353059	0.124482	no	chr20	35847350	35863400	+
circRNA10100	2.7512	2.79865	3.30093	2.87978	6.17937	11.0787	16.0129	14.9974	9.83041	13.908	13.1655	3.58199	up	1.87793	0.000310546	0.0346622	yes	chr1	231795242	231818517	+
circRNA10101	3.88525	3.78527	2.14506	4.83499	4.89915	4.82845	11.5906	10.72	9.6463	8.05013	8.9671	3.90994	up	1.19749	0.0097989	0.0687607	yes	chr1	232460887	232471528	-
circRNA10102	7.05382	7.16797	5.04749	8.06037	10.3121	9.66666	24.221	21.3093	20.0391	18.4077	18.7288	7.52836	up	1.31485	0.00784829	0.0627936	yes	chr1	232460887	232479730	-
circRNA10103	2.39773	2.69678	3.78388	2.30676	4.36514	4.41401	3.05706	4.43611	2.91326	4.40211	3.84451	3.11006	up	0.305858	0.211467	0.358179	no	chr1	233090061	233227371	-
circRNA10104	0.964053	1.06769	0.946007	0.815843	1.72504	1.87763	1.54298	1.44302	0.85865	2.75795	1.69605	1.10373	up	0.619795	0.142676	0.275609	no	chr1	235780865	235793612	-
circRNA10105	1.1107	1.20624	1.15375	1.11065	2.18774	2.31443	2.09591	1.86756	1.2509	3.63853	2.23347	1.35381	up	0.722255	0.0951825	0.211992	no	chr1	235780865	235801097	-
circRNA10106	7.79667	7.72167	8.0134	7.04933	5.89888	4.22979	4.8918	8.13043	7.30722	5.40287	5.99242	7.29599	down	-0.283965	0.169153	0.308358	no	chr1	236812738	236853088	+
circRNA10107	4.03317	4.30811	4.09104	3.85388	3.19491	2.28584	2.65407	4.00393	4.15756	2.89985	3.20025	3.89622	down	-0.283892	0.148092	0.282532	no	chr1	236835547	236853088	+
circRNA10108	4.28525	4.64979	4.66203	4.45434	3.33186	2.70184	2.79688	4.90418	4.32964	3.19401	3.58531	4.27666	down	-0.254385	0.216273	0.36351	no	chr1	236850344	236863554	+
circRNA10109	0.916655	1.00271	0.935687	0.881451	1.35301	2.31434	1.86537	2.27086	1.37886	2.2362	2.01313	1.0179	up	0.983837	0.00262081	0.0465657	no	chr1	243164284	243172846	-
circRNA1011	37.8559	39.9759	32.0927	36.9154	38.4396	30.9384	38.0653	36.7211	29.7643	32.528	33.6034	37.0559	down	-0.141095	0.140482	0.272611	no	chr20	36499588	36526006	+
circRNA10110	1.49957	1.8968	2.37453	2.19876	2.78879	5.60875	5.03344	6.08115	3.22607	5.09811	5.0095	2.15169	up	1.21919	0.0021672	0.0452119	yes	chr1	243169628	243186422	-
circRNA10111	6.49419	7.61951	7.85559	6.63944	8.16544	8.55431	8.17309	10.4448	9.40598	10.2867	9.37297	7.35483	up	0.349814	0.00815512	0.0632835	no	chr1	243270105	243293219	+
circRNA10112	8.011	9.34537	9.96047	8.96097	10.4259	10.6882	10.3496	13.5286	11.6157	13.2185	11.8801	9.34074	up	0.346942	0.0134973	0.0781973	no	chr1	243270105	243426558	+
circRNA10113	4.93599	5.39489	5.89219	5.66698	6.85343	7.05725	6.3844	7.7414	6.4361	7.51402	7.02663	5.74869	up	0.289599	0.0165794	0.0863174	no	chr1	243304713	243316893	+
circRNA10114	16.7808	18.3697	20.184	13.8474	22.8709	14.1882	22.2293	19.5884	18.9891	16.616	18.3222	18.4105	down	-0.00694065	0.966646	0.978918	no	chr1	243695591	243735747	-
circRNA10115	26.4842	29.1587	32.9554	29.182	27.7241	34.3154	38.1772	33.4366	36.2274	29.7768	34.3867	29.1009	up	0.240786	0.0193227	0.0926104	no	chr1	244857598	244860474	-
circRNA10116	26.2874	29.8457	30.6497	24.2319	33.8357	33.1004	41.1617	56.7719	39.7199	32.7911	40.709	28.9701	up	0.490783	0.0520825	0.150584	no	chr1	245858496	245929937	-
circRNA10117	26.8527	27.655	29.3447	39.7468	60.8665	100.959	89.6696	103.793	21.273	136.742	90.4873	36.8931	up	1.29436	0.0450984	0.140519	yes	chr9	271627	289581	+
circRNA10118	14.5088	11.4504	13.0968	16.2056	35.648	51.6355	51.421	45.7506	9.82943	75.4165	46.8106	18.1819	up	1.36433	0.0512611	0.149476	no	chr9	286461	317128	+
circRNA10119	1.94961	2.09698	1.68082	3.04379	5.13762	7.36522	9.54528	7.16889	2.31837	9.68023	7.2156	2.78176	up	1.37512	0.0252903	0.105881	yes	chr9	325671	328171	+
circRNA1012	9.05604	9.84147	5.73517	6.4589	7.18677	6.61085	6.79072	6.73624	6.00066	3.57973	5.94364	7.65567	down	-0.365182	0.123049	0.250111	no	chr20	36578741	36578966	+
circRNA10120	3.7969	3.11242	3.43007	4.99272	10.114	17.5161	14.1291	12.382	4.34553	19.5447	13.5835	5.08921	up	1.41634	0.0282355	0.111737	yes	chr9	382513	418207	+
circRNA10121	23.5644	27.1525	30.3407	27.9922	29.5003	24.6874	28.18	26.4786	24.1925	27.7298	26.2537	27.71	down	-0.0778897	0.339199	0.490114	no	chr9	2028987	2123937	+
circRNA10122	9.18919	11.3965	9.24407	9.9603	12.3562	7.04743	10.2085	11.2849	11.3317	7.3669	9.44789	10.4293	down	-0.142572	0.412899	0.560192	no	chr9	4823548	4833228	+
circRNA10123	2.66788	3.79185	3.16893	2.99163	4.79044	4.97922	5.18076	4.30942	2.32224	5.62616	4.48356	3.48215	up	0.364668	0.191488	0.334938	no	chr9	5064883	5073785	+
circRNA10124	4.04106	5.3635	4.86242	4.34584	7.09017	6.52206	7.27049	5.86222	3.43746	7.70986	6.16042	5.1406	up	0.261092	0.304504	0.45706	no	chr9	5066678	5090570	+
circRNA10125	15.1223	21.3683	19.3598	19.7745	27.6039	20.6923	26.0234	23.3637	30.8045	26.9908	25.5749	20.6458	up	0.308884	0.100657	0.219696	no	chr9	6420912	6460791	+
circRNA10126	3.72238	5.66383	4.33694	4.23585	6.50562	5.14456	6.07858	7.57772	8.03815	7.35355	6.83851	4.89292	up	0.482986	0.0305424	0.116247	no	chr9	6475391	6482099	+
circRNA10127	35.9741	39.6051	44.5699	39.1322	55.4803	55.4603	66.4518	76.0183	59.1185	62.8345	63.9767	42.9523	up	0.57481	0.00269343	0.0467575	no	chr9	6814631	7049200	+
circRNA10128	4.33746	5.01154	6.29924	4.59363	5.79551	5.74116	6.06849	7.82113	7.20225	5.72362	6.51133	5.20748	up	0.322368	0.0494796	0.146642	no	chr9	6980925	6990524	+
circRNA10129	4.65427	6.3913	5.90654	4.33167	7.18801	3.20553	6.93457	8.69064	5.96369	4.59694	5.87828	5.69436	up	0.0458593	0.870621	0.916397	no	chr9	13205036	13224583	-
circRNA1013	0.708143	0.973712	1.18825	0.688879	1.48742	2.11008	2.6564	2.68101	1.63395	2.87647	2.39158	1.00928	up	1.24464	0.00151922	0.0431249	yes	chr20	37035242	37055656	-
circRNA10130	14.0986	13.6331	17.6965	11.2983	11.2811	11.2011	12.1234	20.5782	18.255	9.55293	14.3421	13.6015	up	0.0764904	0.771918	0.850066	no	chr9	15623267	15695337	+
circRNA10131	4.77014	4.55564	5.47383	5.0249	6.0342	7.11383	8.50334	12.5291	6.56793	8.37525	8.61789	5.17174	up	0.736684	0.0278301	0.110661	no	chr9	17309058	17416189	+
circRNA10132	5.79014	5.23387	6.59116	6.36035	8.02148	8.28458	10.751	16.616	8.5449	10.3546	10.9102	6.3994	up	0.769672	0.0374313	0.127902	no	chr9	17309058	17342444	+
circRNA10133	0.790086	0.708685	0.914536	0.847484	0.866051	0.961591	1.24132	2.18528	1.20404	1.26011	1.37047	0.825369	up	0.731561	0.0599488	0.162137	no	chr9	17330632	17342444	+
circRNA10134	12.2633	5.06012	6.42588	30.1791	7.28728	383.892	251.194	135.595	6.21818	142.214	183.823	12.2431	up	3.90827	0.053323	0.15254	no	chr9	19118321	19123647	-
circRNA10135	6.67341	4.30034	3.71949	17.0267	4.58552	238.245	150.267	82.7734	4.17214	74.8957	110.071	7.26109	up	3.9221	0.0598215	0.162003	no	chr9	19119650	19121165	-
circRNA10136	4.32909	5.83512	5.436	4.77418	6.84366	6.60962	6.56488	8.19353	8.83291	8.79665	7.79952	5.44361	up	0.518822	0.00813918	0.0632835	no	chr9	19276158	19300331	+
circRNA10137	4.53046	5.84197	5.53814	4.75726	7.0122	6.64782	6.78187	8.36285	8.93524	8.9336	7.93228	5.53601	up	0.518889	0.00763389	0.0623627	no	chr9	19276158	19305527	+
circRNA10138	2.01044	2.28405	2.3162	1.9204	2.6823	3.00743	2.86061	3.73355	4.1824	3.37736	3.43227	2.24268	up	0.61394	0.00457318	0.053045	no	chr9	19286769	19300331	+
circRNA10139	2.10624	2.57751	2.53989	2.07506	2.8311	3.36466	3.1285	4.08729	4.61388	3.58568	3.756	2.42596	up	0.630642	0.00433981	0.0522147	no	chr9	19288596	19300331	+
circRNA1014	0.210346	0.57556	0.599693	0.421236	0.672654	0.678676	0.890042	1.19145	0.786812	0.938137	0.897023	0.495898	up	0.855102	0.00984652	0.0688397	no	chr20	37066724	37068186	-
circRNA10140	2.03983	1.70482	2.28615	1.87211	2.34526	2.84652	2.51542	3.71341	2.63887	2.78151	2.89915	2.04963	up	0.500262	0.0118565	0.0738721	no	chr9	19316417	19316839	+
circRNA10141	4.0512	4.00401	4.51652	4.25434	5.27594	5.17045	5.29992	6.92391	6.15904	7.02526	6.11572	4.4204	up	0.468343	0.00831514	0.0638352	no	chr9	19352073	19360489	+
circRNA10142	2.10981	3.07246	2.71917	2.53275	3.67934	3.73589	3.19632	4.28245	4.39295	3.91814	3.90515	2.82271	up	0.468299	0.0136651	0.0787455	no	chr9	19356972	19358160	+
circRNA10143	2.55091	1.94343	2.63709	2.35282	2.75262	3.4094	3.12071	4.36581	4.17322	3.78479	3.77078	2.44737	up	0.623631	0.00208867	0.0448814	no	chr9	19360244	19361963	+
circRNA10144	6.04829	8.34582	9.41646	5.89483	9.68375	4.12886	7.04537	7.90696	6.192	9.09455	6.87355	7.87783	down	-0.196743	0.413871	0.560752	no	chr9	20819796	20885230	+
circRNA10145	10.7666	13.725	14.3263	12.0425	17.4486	21.3852	16.5926	14.4458	12.6672	30.5837	19.1349	13.6618	up	0.486059	0.169318	0.308525	no	chr9	21008021	21026723	-
circRNA10146	2.17353	2.90976	2.69107	3.75352	2.27452	3.60133	2.68759	4.41122	2.96833	2.66457	3.26661	2.76048	up	0.242873	0.280064	0.431314	no	chr9	26907834	26910439	-
circRNA10147	2.86798	2.18506	2.41958	1.81206	1.98167	0.952189	1.66962	2.16929	2.41018	2.32385	1.90502	2.25327	down	-0.242211	0.32238	0.474116	no	chr9	27009020	27017050	+
circRNA10148	13.8911	16.4015	18.1779	20.8073	12.7638	23.8771	17.7504	12.4676	16.218	17.6408	17.5908	16.4083	up	0.100393	0.628085	0.740739	no	chr9	33026475	33030667	+
circRNA10149	2.69353	3.51005	3.8727	3.38042	3.64913	3.34671	5.09994	4.88738	3.78846	4.20425	4.26535	3.42116	up	0.318177	0.0663814	0.172112	no	chr9	33351560	33354892	+
circRNA1015	0.404773	0.291082	0.262224	0.30413	0.189846	0.0777848	0.158987	0.104431	0.111032	0.0270177	0.0958505	0.290411	down	-1.59924	0.00234942	0.0452184	yes	chr20	37119698	37121036	-
circRNA10150	2.3805	3.12443	3.64149	1.95332	3.52196	2.34222	2.80573	3.25158	2.99563	3.08624	2.89628	2.92434	down	-0.0139095	0.94104	0.962065	no	chr9	33971651	33989126	-
circRNA10151	39.1318	43.3817	42.7378	47.3775	42.601	79.1947	63.6145	60.2218	51.0378	59.0824	62.6303	43.046	up	0.540982	0.0112228	0.072478	no	chr9	35705750	35706111	-
circRNA10152	3.19122	3.83787	1.95555	2.48439	3.18294	4.2268	3.34095	1.90981	3.74344	4.0013	3.44446	2.9304	up	0.233183	0.356403	0.506161	no	chr9	36246031	36249397	-
circRNA10153	0	0.212618	0.323875	0	1.31011	0.968733	2.72004	1.26117	0.446965	2.52869	1.58512	0.369321	up	2.10165	0.0521667	0.150752	no	chr9	36597222	36607673	+
circRNA10154	60.4672	65.8759	73.4936	69.1082	95.6528	70.3318	88.7121	92.5912	81.7476	90.8632	84.8492	72.9195	up	0.218595	0.146583	0.280657	no	chr9	37126312	37305714	+
circRNA10155	2.79091	5.16704	4.70871	3.77637	5.3428	3.80354	5.41032	5.0632	6.8172	4.64831	5.14851	4.35717	up	0.240766	0.283186	0.434419	no	chr9	37768076	37770739	+
circRNA10156	24.1248	31.065	27.4638	27.5803	25.8193	24.6466	28.5899	25.9506	34.381	21.5912	27.0319	27.2106	down	-0.00951042	0.944008	0.964105	no	chr9	37768076	37776405	+
circRNA10157	11.6616	7.92926	8.89496	20.7031	13.4707	7.81695	8.86004	6.98579	1.78871	5.37223	6.16474	12.5319	down	-1.02349	0.047533	0.144042	yes	chr9	41953183	41960892	-
circRNA10158	3.2051	0.893595	2.77711	1.16715	1.99518	5.03706	3.7561	11.7701	0.226134	3.58501	4.87488	2.00762	up	1.27988	0.208582	0.354712	no	chr9	42856198	42861818	+
circRNA10159	3.67736	1.186	2.99182	1.79704	2.60476	6.70733	5.24493	13.4307	0.278997	3.89531	5.91145	2.4514	up	1.26991	0.186327	0.329114	no	chr9	42856198	42864465	+
circRNA1016	21.2947	19.0436	21.2149	27.0398	23.5257	30.2553	28.4121	25.763	28.7705	28.1432	28.2688	22.4238	up	0.334182	0.00859323	0.0642966	no	chr20	41092472	41101353	+
circRNA10160	9.10807	3.80347	7.98352	4.22747	3.38177	3.41481	1.59144	11.4807	4.01421	4.13639	4.92751	5.70086	down	-0.21032	0.7197	0.812943	no	chr9	64373187	64378811	+
circRNA10161	15.8738	13.8237	17.2159	26.7456	19.6818	25.6446	21.3417	17.5798	21.7265	20.7983	21.4182	18.6681	up	0.198258	0.324408	0.475948	no	chr9	68248806	68260996	+
circRNA10162	16.9636	15.0379	18.7343	28.842	21.0331	27.6111	22.8069	18.7868	23.2835	22.4169	22.981	20.1222	up	0.191659	0.340015	0.490685	no	chr9	68248806	68261001	+
circRNA10163	6.11534	8.60549	9.25058	5.99925	8.36264	8.32804	11.0983	9.16833	11.2141	10.4136	10.0445	7.66666	up	0.389731	0.0274015	0.109632	no	chr9	70350114	70350471	+
circRNA10164	228.964	153.489	259.828	351.75	112.515	57.2369	111.808	2.76517	7.95261	75.7626	51.1051	221.309	down	-2.11453	0.0112426	0.0724936	yes	chr9	70681506	70784279	-
circRNA10165	2.05759	3.10331	3.64332	3.97826	5.40608	13.2429	10.0445	19.3585	9.96515	9.90649	12.5035	3.63771	up	1.78123	0.00647774	0.059261	yes	chr9	71709259	71712260	-
circRNA10166	3.8569	3.3891	2.99578	5.34512	4.72009	4.31311	6.47723	2.84135	3.69655	6.27781	4.72121	4.0614	up	0.217181	0.457388	0.599421	no	chr9	71866799	71875083	-
circRNA10167	16.311	5.86893	3.85202	34.4548	10.1452	20.368	5.48427	0.625622	0.73961	5.87703	6.6189	14.1264	down	-1.09373	0.292694	0.444615	no	chr9	72223120	72231181	+
circRNA10168	2.51612	2.8727	3.58134	4.27536	2.40467	3.39838	3.19138	2.85602	3.09957	3.30305	3.16968	3.13004	up	0.0181573	0.918039	0.947436	no	chr9	74996447	74999870	-
circRNA10169	0.901824	0.634209	0.268354	2.02305	1.0755	1.23136	0.932157	0.183686	0.234357	1.21657	0.759626	0.980588	down	-0.368358	0.571871	0.696849	no	chr9	76308645	76310851	+
circRNA1017	1.34353	2.85048	3.30016	2.18016	1.95611	0.879223	1.26936	1.57388	3.10022	2.29769	1.82407	2.32609	down	-0.350741	0.365464	0.514717	no	chr20	41267463	41269083	-
circRNA10170	10.6097	7.49238	16.5007	15.4992	17.7973	39.8478	32.9567	18.5378	6.35982	43.8561	28.3116	13.5799	up	1.05993	0.102317	0.221946	no	chr9	76629192	76644912	-
circRNA10171	4.08327	3.69642	4.63849	5.02836	5.27438	4.72384	6.44722	3.17352	3.47778	5.73583	4.71164	4.54419	up	0.052206	0.818089	0.881695	no	chr9	77228122	77282274	+
circRNA10172	2.06331	2.37492	2.96613	2.54179	2.78212	2.36956	3.34678	1.71902	1.92928	2.81474	2.43588	2.54565	down	-0.0635953	0.754015	0.836663	no	chr9	77353409	77357838	+
circRNA10173	0.287352	0.359957	1.42155	0.353299	1.96384	0.372736	0.790066	0.778431	0.433526	0.230162	0.520984	0.877199	down	-0.751664	0.371579	0.520961	no	chr9	77529069	77529253	-
circRNA10174	4.54846	5.16355	5.06284	5.30105	6.30707	4.85521	5.91795	6.18835	4.62031	4.38323	5.19301	5.27659	down	-0.0230367	0.861093	0.910325	no	chr9	78254836	78264316	+
circRNA10175	17.9833	18.1214	15.8585	23.9948	13.8749	10.6397	29.1883	8.65383	13.3736	16.9656	15.7642	17.9666	down	-0.188663	0.603886	0.722871	no	chr9	83309536	83349757	-
circRNA10176	24.1329	24.0335	24.312	25.2421	24.7383	24.3631	23.8273	18.0133	26.3487	26.0729	23.7251	24.4918	down	-0.0458853	0.64022	0.750655	no	chr9	83665030	83677961	-
circRNA10177	2.75294	3.60853	3.20285	3.67723	5.86326	4.41162	6.13193	4.72111	4.37294	5.78574	5.08467	3.82096	up	0.412217	0.0924463	0.208507	no	chr9	85669485	85692813	-
circRNA10178	8.70847	8.77963	8.09062	8.7147	13.9381	10.4745	11.5554	9.58343	8.84336	13.5947	10.8103	9.64631	up	0.164354	0.419411	0.565512	no	chr9	85692689	85712566	-
circRNA10179	3.27538	3.5262	3.64149	4.47452	4.49022	6.18786	4.85603	4.78365	5.66225	7.43639	5.78524	3.88156	up	0.575738	0.0134398	0.0780692	no	chr9	86308429	86310809	-
circRNA1018	4.58687	5.08677	4.60471	4.60541	5.3966	3.95091	4.68793	5.50681	7.57839	4.62755	5.27032	4.85607	up	0.1181	0.553928	0.683159	no	chr20	41512846	41533570	-
circRNA10180	2.59565	3.03787	3.47561	3.52878	3.76914	3.97979	3.51614	2.7787	4.06743	3.49167	3.56675	3.28141	up	0.120294	0.38389	0.53252	no	chr9	92268174	92285839	-
circRNA10181	4.94627	4.78848	5.52855	5.23349	5.15185	5.67152	5.0077	4.03084	5.3533	4.65496	4.94366	5.12973	down	-0.0533022	0.57375	0.698362	no	chr9	92277863	92289426	-
circRNA10182	360.913	415.33	364.621	336.255	431.557	220.202	304.87	191.524	325.009	301.857	268.693	381.735	down	-0.506617	0.00926394	0.0669241	no	chr9	95060694	95080780	+
circRNA10183	5.63987	7.04567	7.31786	7.12462	8.40533	5.82392	7.55186	5.22332	8.73912	7.45296	6.95824	7.10667	down	-0.0304521	0.853088	0.905311	no	chr9	95915668	95928864	+
circRNA10184	49.2014	39.2948	43.9264	58.2627	43.0241	29.0348	32.6034	20.145	28.1307	33.616	28.706	46.7419	down	-0.703365	0.00270358	0.0467575	no	chr9	96458379	96484633	+
circRNA10185	4.83912	1.34707	1.43736	21.3269	1.24054	33.2348	3.89784	2.55125	1.81797	3.81983	9.06434	6.03819	up	0.586087	0.68691	0.788222	no	chr9	99844649	99847615	+
circRNA10186	14.3642	14.6272	16.9965	18.0885	16.9164	23.6046	23.078	14.9374	22.5249	23.2707	21.4831	16.1985	up	0.407338	0.0288414	0.112878	no	chr9	100006506	100022226	-
circRNA10187	21.3569	18.4493	23.8296	24.6409	23.331	37.1714	34.4814	20.483	31.9974	39.202	32.667	22.3215	up	0.5494	0.0312814	0.1172	no	chr9	100052417	100060172	-
circRNA10188	9.97871	16.2332	14.7743	13.1873	12.7867	9.1632	14.9123	7.23001	14.4595	13.4688	11.8468	13.392	down	-0.176885	0.433979	0.578675	no	chr9	100104498	100126549	+
circRNA10189	6.3402	7.29729	8.70302	9.39428	8.95367	5.20159	9.17584	5.50496	10.9032	5.91388	7.3399	8.13769	down	-0.148859	0.555168	0.683985	no	chr9	105361191	105363007	+
circRNA1019	8.82163	8.72249	8.66673	7.47654	9.06757	6.46539	8.92359	9.50379	11.6472	7.13663	8.73532	8.55099	up	0.0307686	0.855399	0.906931	no	chr20	41533050	41551360	-
circRNA10190	14.7612	16.6411	20.1108	10.8089	12.0068	10.2338	8.07291	5.63645	5.01816	9.30569	7.65341	14.8658	down	-0.957819	0.00844045	0.0639612	no	chr9	105705597	105722621	+
circRNA10191	14.7448	14.345	24.169	13.1779	10.9179	11.6911	11.5349	8.01691	7.09999	13.0907	10.2867	15.4709	down	-0.588776	0.0888885	0.203279	no	chr9	105721537	105748190	+
circRNA10192	8.15271	8.80944	11.2842	9.15553	7.85864	4.8627	6.71116	4.41901	12.6704	5.28827	6.7903	9.05211	down	-0.414778	0.222668	0.370639	no	chr9	109033307	109064567	-
circRNA10193	9.61481	10.4466	12.8418	11.2022	9.61358	5.72213	7.99832	5.08567	14.4538	6.59949	7.97188	10.7438	down	-0.430512	0.183512	0.325703	no	chr9	109033307	109073438	-
circRNA10194	7.09318	7.5393	8.11511	8.29109	7.33296	4.28083	5.79862	3.34097	9.60691	4.95121	5.59571	7.67432	down	-0.455719	0.127142	0.255708	no	chr9	109050283	109073438	-
circRNA10195	2.66701	2.53278	3.50838	3.51399	3.01083	1.93203	2.5749	1.54537	5.06286	1.78254	2.57954	3.0466	down	-0.240085	0.521413	0.655822	no	chr9	109057191	109060452	-
circRNA10196	5.70904	6.23089	7.45076	6.83065	5.30839	3.27402	4.68401	2.60172	7.29848	4.23371	4.41839	6.30595	down	-0.513193	0.081235	0.193337	no	chr9	109080839	109087342	-
circRNA10197	11.5298	12.3007	14.907	9.84688	8.69056	5.53799	6.53246	2.26975	7.80881	5.26799	5.4834	11.455	down	-1.06283	0.00300188	0.047871	yes	chr9	109420424	109433161	-
circRNA10198	9.08764	9.1683	11.1844	8.11715	6.4546	4.09864	5.72061	1.68315	6.58488	4.5148	4.52042	8.80241	down	-0.961443	0.00552937	0.055695	no	chr9	109428621	109438234	-
circRNA10199	18.2903	18.2784	20.0443	21.6866	23.7949	25.5147	28.8524	19.4299	20.5287	21.3161	23.1284	20.4189	up	0.179758	0.231593	0.379786	no	chr9	111386377	111391824	-
circRNA102	3.56907	5.12492	4.26749	3.63112	5.92318	4.06425	5.83804	5.20848	7.05544	4.83149	5.39954	4.50316	up	0.261901	0.222503	0.370439	no	chr13	77719532	77753358	+
circRNA1020	3.63942	3.54692	3.82438	5.01603	12.1337	14.3913	10.6154	11.5731	7.27888	15.2226	11.8162	5.6321	up	1.06903	0.022155	0.0992398	yes	chr20	44978443	44997306	+
circRNA10200	7.3505	7.11798	7.96502	8.22344	4.8488	5.54367	5.82762	5.2994	3.81455	6.13352	5.32375	7.10115	down	-0.415609	0.0429557	0.137071	no	chr9	111570091	111578951	-
circRNA10201	5.04858	4.87154	4.86848	5.85983	3.73434	3.78926	3.60104	3.60246	2.60503	3.7919	3.47794	4.87655	down	-0.487629	0.0109522	0.0717463	no	chr9	111574734	111589382	-
circRNA10202	10.7919	8.01107	10.0633	14.702	22.0139	34.1037	29.1552	20.6517	26.8346	24.0468	26.9584	13.1164	up	1.03936	0.00342825	0.0490558	yes	chr9	111929500	111931357	+
circRNA10203	1.04007	1.49437	1.56904	1.39364	1.35329	0.793802	0.706471	0.336129	1.37576	0.65089	0.772611	1.37008	down	-0.82645	0.0203391	0.0950215	no	chr9	112078538	112080165	-
circRNA10204	3.25171	3.43831	3.60944	2.97583	4.0425	1.3033	1.82485	0.959049	2.83771	1.8675	1.75848	3.46356	down	-0.977924	0.00302815	0.047871	no	chr9	112080074	112143623	-
circRNA10205	3.04233	2.95737	3.31965	2.64906	3.54865	1.23608	1.63177	0.810239	2.45235	1.62852	1.55179	3.10341	down	-0.999921	0.00215489	0.0451812	no	chr9	112098470	112157613	-
circRNA10206	53.3969	57.7589	50.1374	56.4955	75.5913	30.4393	44.0933	34.8803	55.2066	48.7443	42.6727	58.676	down	-0.459456	0.0351461	0.124192	no	chr9	112234820	112252788	-
circRNA10207	9.67289	8.03228	8.74059	10.2712	12.3242	7.7398	8.7811	6.86537	10.0408	7.76248	8.23792	9.80824	down	-0.251714	0.127903	0.256714	no	chr9	112262435	112276013	-
circRNA10208	20.3238	17.5281	18.2364	22.0625	29.2358	15.9794	18.038	13.2391	22.4592	16.5951	17.2621	21.4773	down	-0.315202	0.145608	0.279363	no	chr9	112268049	112297916	-
circRNA10209	22.0381	19.7344	19.9543	24.4664	33.0304	16.934	19.6108	13.6481	25.5434	19.0837	18.964	23.8447	down	-0.330407	0.159625	0.297376	no	chr9	112275844	112297916	-
circRNA1021	5.99816	6.92439	5.88062	5.54309	4.8227	3.91565	3.83422	5.4163	2.95194	3.72103	3.96783	5.83379	down	-0.556084	0.00786561	0.0628379	no	chr20	45848450	45848675	-
circRNA10210	14.1886	10.9468	15.4491	13.6232	9.25191	15.6085	17.2615	9.77458	10.5157	12.9609	13.2243	12.6919	up	0.059275	0.778776	0.854985	no	chr9	112416841	112454162	+
circRNA10211	10.256	8.34907	10.6991	8.48326	6.32619	9.87484	10.7604	6.35585	5.88297	8.18975	8.21276	8.82274	down	-0.10336	0.6339	0.745638	no	chr9	112438431	112459577	+
circRNA10212	4.59409	7.39911	6.33889	7.17259	22.705	44.7096	27.332	21.2854	12.872	36.5565	28.5511	9.64194	up	1.56615	0.0246155	0.104676	yes	chr9	114343708	114346009	-
circRNA10213	3.70885	4.50256	2.9609	4.44742	18.9085	18.1151	14.109	9.01058	6.10419	14.1933	12.3064	6.90565	up	0.833565	0.185102	0.327539	no	chr9	114381060	114381446	-
circRNA10214	24.3727	29.8452	26.6873	24.7918	16.1389	15.2179	20.3763	14.6847	31.1243	13.2879	18.9382	24.3672	down	-0.363639	0.214635	0.361722	no	chr9	121763505	121763879	+
circRNA10215	0.323022	0.754683	0.635942	0.510627	0.742055	0.618531	0.670635	0.500034	0.778479	0.720754	0.657687	0.593266	up	0.148722	0.514909	0.650945	no	chr9	121989195	121989770	-
circRNA10216	1.19112	1.08455	1.22149	1.08693	0.915234	0.816921	1.12822	0.71301	0.970808	0.977552	0.921303	1.09986	down	-0.255577	0.084054	0.197317	no	chr9	122285169	122286166	+
circRNA10217	1.90531	1.92343	2.133	2.31365	2.31533	2.21418	2.93034	2.20416	3.05973	2.62917	2.60751	2.11814	up	0.299875	0.0491856	0.14632	no	chr9	122853952	122855878	-
circRNA10218	1.95301	1.79546	1.88368	1.65911	1.82505	1.79554	2.59372	1.77804	2.15704	2.03716	2.0723	1.82326	up	0.184711	0.174759	0.315511	no	chr9	122855184	122855878	-
circRNA10219	2.83362	3.26475	3.16113	2.65852	3.14291	2.18211	2.85218	1.96442	2.72235	2.47268	2.43875	3.01219	down	-0.304669	0.0238779	0.102863	no	chr9	122984485	122990213	+
circRNA1022	9.24765	10.4966	8.90376	8.22855	7.78227	6.50942	6.09865	9.15851	7.90994	6.99967	7.33524	8.93176	down	-0.284101	0.0579757	0.159067	no	chr20	48952705	48963898	+
circRNA10220	3.96159	5.09063	4.91793	4.38373	5.27387	3.67807	4.82477	3.75673	4.77452	4.68084	4.34299	4.72555	down	-0.121795	0.309937	0.462341	no	chr9	122984485	123020459	+
circRNA10221	2.35659	2.99797	2.85366	2.76423	2.45671	1.93969	2.33469	1.76803	2.75489	2.24377	2.20821	2.68583	down	-0.282489	0.055238	0.154994	no	chr9	122989297	122990213	+
circRNA10222	2.06607	2.07313	2.1824	1.93383	2.20421	1.10652	1.17192	0.993323	1.695	1.98534	1.39042	2.09193	down	-0.589311	0.0194253	0.0928548	no	chr9	123169902	123184298	-
circRNA10223	18.9361	21.3792	18.0788	19.9949	18.1585	28.0557	15.029	12.4714	11.0439	16.0254	16.5251	19.3095	down	-0.224652	0.413265	0.560459	no	chr9	123452276	123457897	-
circRNA10224	6.97676	6.07954	5.69951	12.9474	14.03	52.4676	53.8588	28.1347	40.8401	53.2683	45.7139	9.14663	up	2.32132	0.000990352	0.039757	yes	chr9	124301936	124321569	+
circRNA10225	6.94443	6.32902	5.54541	11.8578	12.9316	53.3732	51.5461	28.3266	38.8858	50.7809	44.5825	8.72164	up	2.35381	0.00100393	0.039757	yes	chr9	124301936	124327445	+
circRNA10226	1.16823	1.78699	1.20164	0.701575	1.30199	0.0900212	0.590609	0.349147	0.161813	0.259408	0.2902	1.23208	down	-2.08598	0.00295275	0.0478323	yes	chr9	124538092	124540187	-
circRNA10227	6.45272	7.6965	5.5267	7.25057	6.69997	4.81458	4.36965	4.24466	6.18925	6.73155	5.26994	6.72529	down	-0.351811	0.0506763	0.148456	no	chr9	125207564	125213522	+
circRNA10228	3.23391	2.33072	2.28548	2.32392	2.88511	2.5667	3.16221	1.26866	2.77063	1.72685	2.29901	2.61183	down	-0.184047	0.460167	0.60184	no	chr9	125227910	125232745	+
circRNA10229	7.9037	8.46451	8.04848	7.56608	10.4594	8.60693	10.014	7.21138	6.69703	7.55351	8.01657	8.48844	down	-0.0825139	0.562995	0.689587	no	chr9	125326416	125330218	+
circRNA1023	7.74696	8.80368	8.09743	8.02978	7.90099	6.1877	6.00627	8.54617	7.34103	6.41012	6.89826	8.11577	down	-0.234495	0.0594144	0.161363	no	chr20	48953556	48976199	+
circRNA10230	3.55199	3.99952	2.98412	3.8274	3.56186	5.13088	4.56691	2.64625	3.41566	3.68898	3.88974	3.58498	up	0.117708	0.543541	0.674607	no	chr9	128508876	128515639	+
circRNA10231	7.02166	7.48898	5.46938	6.21848	5.36731	3.7456	3.93795	2.51261	3.85219	2.78694	3.36706	6.31316	down	-0.906874	0.00063118	0.0368952	no	chr9	128740772	128742745	-
circRNA10232	11.5471	11.2351	11.471	13.3935	8.93385	7.81881	9.2421	6.32362	8.42662	6.98031	7.75829	11.3161	down	-0.544567	0.00442511	0.0525945	no	chr9	129128985	129131639	+
circRNA10233	26.8974	28.8328	29.2935	23.3963	41.3284	51.8861	59.2211	38.0606	30.4145	51.2723	46.1709	29.9497	up	0.624444	0.0336568	0.121704	no	chr9	129895838	129929695	-
circRNA10234	27.3727	27.4528	26.1062	25.5422	33.1471	27.5454	32.4026	21.0974	30.4574	29.3447	28.1695	27.9242	up	0.0126192	0.920177	0.948608	no	chr9	131432617	131455166	+
circRNA10235	3.60896	3.55904	3.80648	4.59723	5.32964	6.80687	5.88928	3.8687	4.0069	5.79904	5.27416	4.18027	up	0.335344	0.148734	0.283302	no	chr9	132331052	132349435	-
circRNA10236	3.57002	7.62991	4.66459	3.99757	10.2935	9.97018	14.3289	10.5884	13.5133	4.49238	10.5786	6.03111	up	0.810658	0.070812	0.178552	no	chr9	134690912	134701333	+
circRNA10237	6.60803	6.95983	3.36894	6.10352	7.57309	4.86148	6.36288	4.42755	4.1393	6.16184	5.19061	6.12268	down	-0.23826	0.315102	0.46687	no	chr9	136215154	136219164	-
circRNA10238	13.5823	13.5033	14.9232	11.7621	14.5686	11.3644	13.4721	9.41225	11.3143	12.5201	11.6166	13.6679	down	-0.2346	0.048537	0.145416	no	chr9	137716626	137818138	+
circRNA10239	8.83833	8.18096	8.85968	7.76886	10.3952	7.84365	8.53617	5.52729	7.96646	8.56704	7.68812	8.8086	down	-0.196282	0.158158	0.295713	no	chr9	137728349	137744090	+
circRNA1024	3.1441	3.4344	3.78206	3.58775	4.194	2.52539	2.39922	3.7003	3.76376	2.62384	3.0025	3.62846	down	-0.273193	0.118488	0.243549	no	chr20	48974766	48976199	+
circRNA10240	2.99674	2.91251	3.48621	3.05134	3.64077	2.73554	3.28251	2.37029	2.8894	3.04491	2.86453	3.21751	down	-0.167648	0.13282	0.263041	no	chr9	137743371	137758011	+
circRNA10241	1.08049	1.28732	0.789061	1.12181	0.231666	0.249164	0.816213	2.73189	1.71904	0	1.10326	0.902071	up	0.290465	0.722706	0.815232	no	chr8	2595565	2604930	-
circRNA10242	3.10487	3.44095	3.33291	4.44446	5.25268	3.90652	4.13482	2.61816	3.68969	4.62366	3.79457	3.91518	down	-0.045141	0.824094	0.885835	no	chr8	11304841	11316893	+
circRNA10243	5.72759	4.80857	4.24842	5.78321	3.87159	4.7426	8.21834	4.18989	7.96684	3.38187	5.69991	4.88788	up	0.221731	0.482136	0.621784	no	chr8	13088487	13090470	-
circRNA10244	9.26406	15.4731	17.51	16.89	15.5933	16.6588	22.1272	26.805	30.3816	21.9372	23.582	14.9461	up	0.657916	0.0175591	0.0885611	no	chr8	17234716	17237373	-
circRNA10245	0.267585	1.7877	0.378216	0.584879	0.9323	1.38838	0.490477	1.38073	0.734005	0.214328	0.841584	0.790137	up	0.0910041	0.890518	0.929272	no	chr8	17589468	17589765	+
circRNA10246	13.1427	15.6121	15.6596	10.6537	9.38867	8.46313	16.4078	27.9174	14.2132	7.14583	14.8295	12.8914	up	0.202063	0.641605	0.751771	no	chr8	17646982	17755961	-
circRNA10247	5.62565	7.29979	5.76367	4.99845	4.77419	4.19728	7.76589	14.1095	6.14371	2.86367	7.016	5.69235	up	0.301625	0.542889	0.674177	no	chr8	17649846	17656065	-
circRNA10248	14.3874	16.8686	22.2991	17.0896	21.3712	20.0331	25.1479	24.5993	23.6014	21.2769	22.9317	18.4032	up	0.317392	0.0388647	0.130264	no	chr8	17950615	17953186	+
circRNA10249	9.93534	11.0331	13.5894	9.49596	11.706	12.6208	13.0886	14.1085	13.3158	12.4123	13.1092	11.152	up	0.233281	0.0516227	0.150001	no	chr8	17963101	17980755	+
circRNA1025	2.38659	2.68019	3.1369	3.00154	2.12945	2.56059	3.1169	3.5453	3.86768	2.6514	3.14837	2.66693	up	0.239425	0.16658	0.305568	no	chr20	49084026	49091022	+
circRNA10250	16.0742	17.478	20.2002	14.9958	19.1925	17.0143	21.8497	22.1524	21.1071	19.097	20.2441	17.5881	up	0.202901	0.0870975	0.201061	no	chr8	17963101	18011827	+
circRNA10251	5.18201	5.97395	6.45416	5.28733	6.31654	6.03699	6.53083	6.37083	7.22876	6.48618	6.53072	5.8428	up	0.160582	0.0702909	0.177863	no	chr8	17989859	17993619	+
circRNA10252	16.1008	18.8932	17.558	21.6582	31.9328	25.3799	32.5897	22.9253	28.3925	38.7967	29.6168	21.2286	up	0.480407	0.0683108	0.174743	no	chr8	22474954	22498112	+
circRNA10253	15.7943	18.5901	17.3238	20.1711	29.6858	24.0157	31.3475	22.5346	27.963	36.0963	28.3914	20.313	up	0.48305	0.0487136	0.145637	no	chr8	22474954	22513432	+
circRNA10254	2.62379	3.04466	2.75091	2.70294	3.89089	3.75288	3.34955	4.40495	3.35627	4.62977	3.89869	3.00264	up	0.376758	0.035336	0.124523	no	chr8	25298944	25310532	+
circRNA10255	3.20108	4.98595	4.52932	5.52502	7.32261	8.6487	6.01766	7.97589	7.28557	8.72672	7.73091	5.1128	up	0.596525	0.0157322	0.0841152	no	chr8	25308783	25317131	+
circRNA10256	5.98265	7.60847	3.14086	3.29253	5.42869	6.50391	5.6397	7.16631	5.27493	6.65739	6.24845	5.09064	up	0.29565	0.257645	0.407581	no	chr8	25407983	25408940	+
circRNA10257	17.8238	18.8973	18.8351	23.7938	25.2069	27.2903	30.2272	30.4705	30.0159	29.3957	29.4799	20.9114	up	0.495443	0.0027806	0.0470826	no	chr8	26338890	26366406	+
circRNA10258	7.11389	11.7873	14.02	11.6885	14.7544	21.811	30.5185	29.4014	17.6025	14.6854	22.8037	11.8728	up	0.941608	0.0214023	0.0974194	no	chr8	26581969	26583983	+
circRNA10259	12.376	9.0716	8.31144	8.57936	9.68163	48.7799	73.7768	54.3027	36.502	48.4628	52.3648	9.60401	up	2.44689	0.00200284	0.0444105	yes	chr8	28356670	28361142	-
circRNA1026	16.9759	15.7494	19.5034	21.1816	19.6366	22.2546	20.9302	16.681	17.7992	21.2108	19.7752	18.6094	up	0.0876593	0.446309	0.589891	no	chr20	49135833	49174269	-
circRNA10260	16.6428	13.73	17.0433	15.9814	12.0822	8.13921	8.91697	7.87896	14.0227	8.05653	9.40287	15.0959	down	-0.682987	0.00577593	0.056619	no	chr8	29132308	29134210	-
circRNA10261	6.51089	7.07125	6.99168	7.03058	6.77264	7.18134	5.8216	7.91926	8.91113	7.48341	7.46335	6.87541	up	0.118378	0.312353	0.464232	no	chr8	30680904	30700135	-
circRNA10262	5.66069	6.27889	6.16607	5.43478	5.10997	5.81264	4.39127	6.29738	7.00672	5.85092	5.87179	5.73008	up	0.0352443	0.778393	0.854862	no	chr8	30689161	30703240	-
circRNA10263	2.3888	2.87154	3.39023	2.44614	3.23961	2.58563	3.51822	3.02306	3.55566	2.94449	3.12541	2.86727	up	0.124371	0.372568	0.521912	no	chr8	31080867	31100955	+
circRNA10264	3.80705	3.78916	3.64912	3.52242	4.3762	3.5693	4.00397	3.77534	4.5046	3.50228	3.8711	3.82879	up	0.015854	0.860456	0.910038	no	chr8	38110379	38121149	+
circRNA10265	2.32305	2.58453	3.1267	2.74917	3.19627	2.6902	2.85346	3.96682	3.94237	1.99918	3.09041	2.79595	up	0.14446	0.507047	0.644135	no	chr8	38247713	38252287	+
circRNA10266	2.96606	2.66302	3.52533	2.7849	3.37208	2.55874	2.89535	4.37994	4.32349	2.42233	3.31597	3.06228	up	0.114827	0.605075	0.723729	no	chr8	38247713	38253718	+
circRNA10267	7.37962	8.79168	9.06952	8.03649	10.6216	7.51892	10.6223	10.5524	13.9951	8.51862	10.2415	8.77977	up	0.222165	0.283979	0.435314	no	chr8	38295796	38305445	-
circRNA10268	38.7626	68.6647	62.5229	45.8024	49.3381	44.7651	58.3116	72.3326	58.6341	53.7706	57.5628	53.0181	up	0.118651	0.539525	0.671303	no	chr8	38825308	38836287	+
circRNA10269	11.8139	15.1675	14.5216	15.4366	17.886	38.109	36.9334	30.5036	46.7037	37.0728	37.8645	14.9651	up	1.33924	0.000376867	0.0363258	yes	chr8	38946124	38957386	+
circRNA1027	1.1971	1.46634	1.69326	1.25843	3.72066	0.957413	1.28421	0.532229	1.4307	1.51401	1.14371	1.86716	down	-0.707116	0.209611	0.355847	no	chr20	53253499	53256571	+
circRNA10270	18.4792	15.4402	22.1211	26.7543	22.2211	58.6934	41.9988	54.7111	55.4874	48.4905	51.8762	21.0032	up	1.30447	5.98038e-05	0.0293042	yes	chr8	39041946	39055772	+
circRNA10271	11.4602	16.8121	16.2937	19.4344	12.8072	51.7255	33.1967	50.7836	58.7094	32.2306	45.3291	15.3615	up	1.56112	0.00376062	0.0499718	yes	chr8	39090047	39091346	+
circRNA10272	11.6414	9.02428	8.86079	10.8597	13.2627	9.80226	10.1928	8.78695	6.92045	10.3945	9.2194	10.7298	down	-0.218872	0.188419	0.331212	no	chr8	41598292	41599304	+
circRNA10273	12.0393	14.8456	13.5681	14.2059	9.47324	12.0587	13.5195	16.0982	11.5811	11.2442	12.9003	12.8265	up	0.00828681	0.956332	0.971686	no	chr8	42401788	42403461	+
circRNA10274	16.7632	16.1979	21.1944	15.4323	17.118	6.20606	7.57839	5.96269	10.08	6.0842	7.18226	17.3411	down	-1.27169	6.15693e-05	0.0293042	yes	chr8	42444646	42463090	-
circRNA10275	8.6924	8.80294	9.53114	7.77257	9.43412	6.22262	8.50261	8.64059	9.04986	5.19782	7.5227	8.84664	down	-0.233878	0.166055	0.305009	no	chr8	42861745	42865489	-
circRNA10276	7.57165	7.61867	8.47807	9.79489	9.96319	10.7365	11.4018	11.5489	11.8094	10.8808	11.2755	8.68529	up	0.376543	0.00484774	0.054002	no	chr8	42906173	42964474	+
circRNA10277	29.067	19.2519	11.7719	18.2903	12.8844	8.60718	11.3445	8.44027	9.91747	5.82299	8.82649	18.2531	down	-1.04823	0.0347102	0.123287	yes	chr8	43178074	43182260	+
circRNA10278	32.1647	33.7969	38.4331	28.9049	40.3806	47.2859	47.5489	57.4704	51.3328	56.5291	52.0334	34.736	up	0.583005	0.000422505	0.0365628	no	chr8	47279270	47713641	+
circRNA10279	15.785	18.372	19.808	14.4749	22.3388	23.3987	25.1088	28.2585	29.396	30.5621	27.3448	18.1557	up	0.590843	0.00148711	0.0430652	no	chr8	47279862	47407961	+
circRNA1028	9.06029	4.48563	2.01265	63.5847	9.95518	28.8876	2.83187	1.02306	0	0	6.54851	17.8197	down	-1.44423	0.41447	0.561253	no	chr20	54157169	54171670	-
circRNA10280	26.9125	31.9708	34.8517	25.1031	38.6695	40.4686	44.3103	48.5721	49.5364	53.0565	47.1888	31.5015	up	0.583023	0.00155979	0.0431249	no	chr8	47293867	47396626	+
circRNA10281	8.51599	8.55812	9.63209	6.16523	11.7991	11.2591	13.5471	15.9802	14.5533	13.8991	13.8477	8.9341	up	0.632258	0.00357922	0.0495831	no	chr8	47407861	47440542	+
circRNA10282	4.48956	4.54564	5.00821	5.15571	6.38954	5.41361	6.0385	6.70909	5.9305	4.80362	5.77907	5.11773	up	0.175331	0.196089	0.340405	no	chr8	52668021	52686967	-
circRNA10283	4.87446	4.43217	4.96058	5.98549	3.06804	3.21796	3.07614	2.79765	4.60058	2.86891	3.31225	4.66415	down	-0.493804	0.0509445	0.149012	no	chr8	53769618	53772167	-
circRNA10284	10.0378	11.2683	11.2018	9.61064	11.2344	10.8265	12.5697	14.5458	12.5382	11.4119	12.3784	10.6706	up	0.214187	0.0556207	0.155612	no	chr8	53984363	54000050	-
circRNA10285	39.9448	43.2204	47.7127	47.5548	49.0807	52.1207	62.0119	53.7581	55.2692	62.3561	57.1032	45.5027	up	0.327621	0.00312587	0.0484733	no	chr8	60572046	60591969	+
circRNA10286	16.7971	18.9474	20.1094	21.3707	19.2254	24.9807	28.9388	23.8707	28.405	26.0654	26.4521	19.29	up	0.455529	0.000499893	0.0366471	no	chr8	60584208	60591969	+
circRNA10287	7.45809	7.0131	8.78114	6.76085	9.64836	5.49504	6.98832	7.02391	5.84185	5.6965	6.20912	7.93231	down	-0.353351	0.0338008	0.121816	no	chr8	60816387	60838255	+
circRNA10288	0.399932	0.488136	0.949383	1.44236	0.667849	1.59621	0.928014	1.23342	0.8962	1.32569	1.19591	0.789533	up	0.599034	0.11859	0.243705	no	chr8	66835763	66836074	+
circRNA10289	5.94295	4.44331	5.50588	6.37443	5.90847	3.5499	4.50533	4.19574	4.74364	4.36245	4.27141	5.63501	down	-0.399705	0.0103081	0.0702638	no	chr8	67076482	67095732	+
circRNA1029	0.661495	0.669603	0.623325	0.77223	0.854203	1.28274	0.881823	1.33429	0.956753	0.963347	1.08379	0.716171	up	0.59771	0.0129912	0.0769496	no	chr20	56381433	56386533	-
circRNA10290	2.87002	2.69281	2.99669	3.00021	3.36002	1.7689	2.2828	2.12858	2.36991	2.4355	2.19714	2.98395	down	-0.441599	0.00126104	0.041835	no	chr8	67103037	67137603	+
circRNA10291	6.16413	5.22075	5.54068	5.72141	5.29007	5.78416	4.45309	5.28822	7.45181	5.71117	5.73769	5.58741	up	0.0382913	0.783537	0.85823	no	chr8	67299209	67301380	-
circRNA10292	3.42308	3.51205	2.70277	3.64892	4.84988	3.12226	9.64983	37.3695	14.5216	16.6342	16.2595	3.62734	up	2.1643	0.0935563	0.210033	no	chr8	68115753	68192525	+
circRNA10293	1.07112	1.12584	1.04732	1.1633	1.49839	0.891024	3.63587	13.2701	5.2243	5.4319	5.69064	1.18119	up	2.26835	0.0939193	0.210416	no	chr8	68118550	68138517	+
circRNA10294	76.8449	88.28	107.83	74.4504	93.4862	74.6851	88.2866	78.4967	80.5595	87.8804	81.9816	88.1783	down	-0.105122	0.387705	0.536418	no	chr8	70170202	70216764	-
circRNA10295	6.2612	5.67878	7.29459	6.00752	7.83636	4.62778	5.56296	6.50918	6.94222	6.67823	6.06407	6.61569	down	-0.125604	0.377979	0.527078	no	chr8	73582770	73688813	-
circRNA10296	7.09551	7.45504	8.4108	8.7955	9.40432	8.18086	11.1847	6.33508	10.0566	12.1313	9.5777	8.23223	up	0.218396	0.283411	0.434668	no	chr8	86374030	86381629	+
circRNA10297	14.0432	15.8933	17.0355	16.2531	20.2414	16.2479	19.0244	10.8679	17.4801	18.6529	16.4547	16.6933	down	-0.020774	0.897823	0.934265	no	chr8	86398342	86411874	+
circRNA10298	6.43249	6.97315	8.43912	7.35128	5.63139	5.52172	6.91558	9.07646	11.0144	6.55949	7.81753	6.96549	up	0.16649	0.466377	0.607339	no	chr8	86528536	86532580	+
circRNA10299	4.81691	5.42817	5.35242	3.04444	4.47955	3.26212	4.42225	3.48121	2.97694	3.43986	3.51648	4.6243	down	-0.395103	0.064665	0.169541	no	chr8	91018390	91024366	-
circRNA103	18.3992	9.51425	19.0604	19.81	19.8323	13.0043	13.1499	13.6617	7.94849	15.5623	12.6653	17.3232	down	-0.451821	0.0880408	0.202346	no	chr13	95115922	95170628	-
circRNA1030	10.2018	9.26172	8.64332	9.49234	8.16964	6.28888	7.33225	6.53851	6.51249	6.8013	6.69469	9.15377	down	-0.45135	0.000799579	0.0385381	no	chr20	61997550	62014707	-
circRNA10300	1.74869	3.27119	2.49639	1.60534	2.08088	1.5122	1.78582	1.8678	1.84197	1.12052	1.62566	2.2405	down	-0.462793	0.115688	0.239627	no	chr8	91018390	91021404	-
circRNA10301	1.96889	3.51994	3.12749	2.42889	6.49442	1.72245	6.23582	2.93724	5.87302	2.63773	3.88125	3.50793	up	0.145904	0.765408	0.845502	no	chr8	91970658	92005297	-
circRNA10302	3.48591	5.21577	7.1341	6.01219	9.43991	4.04024	6.90305	8.82496	11.4646	4.7311	7.19279	6.25757	up	0.200948	0.595212	0.716235	no	chr8	93755778	93758576	+
circRNA10303	1.71497	2.85885	3.79904	2.93341	3.24445	5.13218	3.48109	3.1718	2.81929	13.9982	5.72052	2.91014	up	0.975055	0.255075	0.404684	no	chr8	94386984	94411315	-
circRNA10304	1.50034	1.67555	1.64015	1.36076	1.56679	2.02677	3.23596	2.70388	2.94786	1.70661	2.52422	1.54872	up	0.70476	0.0255613	0.10648	no	chr8	94491578	94492818	-
circRNA10305	5.43098	4.71755	5.75772	4.96335	5.52208	6.85191	6.6954	8.57585	7.07826	6.19965	7.08021	5.27834	up	0.423709	0.00734705	0.0616358	no	chr8	94495731	94499506	-
circRNA10306	3.04563	2.88145	3.04185	2.45344	2.68435	2.16359	3.57259	4.10288	3.14678	2.40318	3.0778	2.82134	up	0.125518	0.528218	0.661862	no	chr8	94761700	94766685	+
circRNA10307	2.61582	3.62909	3.12085	4.97983	2.44242	4.15926	4.17606	3.82067	2.39565	4.05523	3.72138	3.3576	up	0.148405	0.540469	0.672156	no	chr8	95252188	95263774	-
circRNA10308	10.7685	11.8407	11.6658	11.6068	13.9528	14.7628	14.2432	13.7778	15.158	15.7509	14.7385	11.9669	up	0.300543	0.00336334	0.0489219	no	chr8	97690952	97719189	+
circRNA10309	2.4344	2.05308	2.34491	3.29609	1.95733	2.47943	2.43583	1.67486	2.1072	3.3076	2.40098	2.41716	down	-0.00968871	0.965091	0.977821	no	chr8	98123336	98130226	+
circRNA1031	13.6113	13.4687	8.66568	13.5147	17.8462	7.58244	19.7744	8.9974	15.9481	8.22759	12.106	13.4213	down	-0.148807	0.657975	0.765694	no	chr20	63775678	63790790	-
circRNA10310	3.72352	3.72339	4.62419	4.18007	5.87244	3.93296	5.31908	5.72615	5.36647	6.35687	5.34031	4.42472	up	0.271336	0.142649	0.275608	no	chr8	99134632	99148010	+
circRNA10311	3.14718	4.70458	4.83648	4.51111	6.20716	5.06253	7.55749	6.79618	6.32785	7.00683	6.55018	4.6813	up	0.484624	0.0201972	0.0947272	no	chr8	99170039	99193057	+
circRNA10312	5.84934	7.28537	7.06201	5.8427	8.24185	6.47162	5.24485	5.7746	6.2529	6.94048	6.13689	6.85625	down	-0.159913	0.22771	0.376084	no	chr8	99274198	99275254	+
circRNA10313	3.34596	2.99011	3.7419	2.65286	4.96901	3.30584	4.91629	4.71723	4.01955	4.94678	4.38114	3.53997	up	0.30757	0.140159	0.272162	no	chr8	99467414	99481802	+
circRNA10314	2.40236	2.37239	2.72759	2.46698	3.10995	2.92884	3.72741	3.4109	3.64933	3.72744	3.48878	2.61585	up	0.415441	0.00284268	0.0473208	no	chr8	99502836	99511512	+
circRNA10315	6.86969	5.20259	6.92559	9.84384	8.12003	12.534	8.43344	21.0738	7.31124	10.4781	11.9661	7.39235	up	0.694851	0.137151	0.26844	no	chr8	100274953	100288267	-
circRNA10316	2.62508	2.00714	2.14318	3.03651	2.49377	4.30339	2.58713	8.0217	2.64872	3.27168	4.16652	2.46114	up	0.75952	0.168184	0.30723	no	chr8	100287501	100288267	-
circRNA10317	7.93388	7.89752	8.98745	8.51149	10.0572	9.37349	10.773	9.68344	9.95622	9.94316	9.94586	8.67751	up	0.196815	0.0312207	0.11712	no	chr8	102327742	102346395	-
circRNA10318	5.23214	5.65746	7.42511	7.96711	6.26927	7.39068	6.47072	5.94998	7.58665	6.03094	6.6858	6.51022	up	0.0383936	0.785528	0.859642	no	chr8	102838744	102843747	-
circRNA10319	16.8192	11.21	6.30317	22.3235	3.62143	8.13586	8.71371	12.8253	0	6.97798	7.33058	12.0555	down	-0.71769	0.27803	0.429039	no	chr8	104427980	104429701	-
circRNA1032	1.00186	1.77579	1.30048	1.3072	0.78909	0.954778	1.15645	1.55087	1.54796	0.884352	1.21888	1.23489	down	-0.0188178	0.943587	0.963864	no	chr21	14853274	14857708	-
circRNA10320	6.16363	7.16875	9.84653	7.45019	8.40046	6.94174	6.42331	9.96623	11.1615	13.1496	9.52848	7.80591	up	0.287679	0.270592	0.420911	no	chr8	106692728	106713985	+
circRNA10321	18.9494	22.5956	30.5514	26.7209	22.0859	32.9986	43.777	50.3657	45.6218	29.6854	40.4897	24.1807	up	0.743703	0.0101729	0.0699539	no	chr8	116655856	116658980	-
circRNA10322	0.984162	1.20129	1.27557	1.37276	1.75928	1.42802	1.89769	1.73426	1.65731	1.77143	1.69774	1.31861	up	0.364596	0.0405313	0.132934	no	chr8	119778019	119791459	-
circRNA10323	8.51165	7.5527	8.29189	7.35182	9.70374	8.83735	9.8748	8.97513	8.59868	10.355	9.3282	8.28236	up	0.171558	0.0879367	0.202236	no	chr8	123226500	123239144	-
circRNA10324	1.37737	1.26415	1.5818	1.42708	2.14645	2.15802	1.74003	1.9068	1.43275	2.13055	1.87363	1.55937	up	0.264873	0.165202	0.304296	no	chr8	123231300	123231757	-
circRNA10325	7.00372	7.62178	7.31102	7.02765	6.40991	5.45942	6.43305	4.36357	5.13994	3.2011	4.91941	7.07482	down	-0.524206	0.0132959	0.0778352	no	chr8	123253322	123267386	-
circRNA10326	0.55874	1.43316	1.55129	0.948672	2.53502	5.14238	5.27755	3.94364	2.44132	3.45243	4.05146	1.40538	up	1.52749	0.00433209	0.0522147	yes	chr8	123337625	123339446	-
circRNA10327	6.50666	7.02684	7.00207	7.57818	9.02525	13.3315	10.5057	10.3104	7.72017	14.294	11.2324	7.4278	up	0.596655	0.0280984	0.111398	no	chr8	129855611	129871496	-
circRNA10328	156.686	160.115	190.883	173.964	293.042	326.304	490.229	362.915	380.851	509.022	413.864	194.938	up	1.08614	0.00154569	0.0431249	yes	chr8	130188109	130358143	-
circRNA10329	0.688765	0.758213	0.83709	0.61588	1.57326	2.89686	1.6232	3.87709	1.36547	1.53594	2.25971	0.894642	up	1.33676	0.0460678	0.141848	yes	chr8	132170334	132186181	-
circRNA1033	135.537	110.213	114.109	215.047	154.669	154.274	129.865	123.211	221.556	156.139	157.009	145.915	up	0.105718	0.678534	0.782273	no	chr21	15014344	15043574	-
circRNA10330	7.06352	7.12983	9.0822	8.00651	7.74626	4.91491	5.67543	8.84169	7.90838	7.91661	7.05141	7.80566	down	-0.146611	0.40034	0.548722	no	chr8	132622611	132661627	-
circRNA10331	42.4931	32.294	34.4676	65.6749	33.9549	22.4175	40.1755	18.4223	22.6089	35.4749	27.8198	41.7769	down	-0.586593	0.105781	0.226651	no	chr8	134532834	134565421	-
circRNA10332	121.701	113.46	96.461	118.783	123.289	114.546	123.999	158.597	93.7851	122.289	122.643	114.739	up	0.0961139	0.520698	0.65516	no	chr8	139885879	140024079	-
circRNA10333	10.2208	10.9916	9.62193	10.8579	12.3336	7.99525	10.6376	8.34151	10.187	10.5768	9.54763	10.8052	down	-0.178508	0.12484	0.252592	no	chr8	140275658	140300614	-
circRNA10334	24.4624	22.0903	22.9488	21.6418	21.2355	16.3213	23.2322	19.3972	21.6343	22.9393	20.7049	22.4758	down	-0.118398	0.259461	0.40953	no	chr8	140300469	140311374	-
circRNA10335	28.938	24.9161	20.8942	35.3083	28.5021	32.1919	32.1764	22.3322	30.0979	24.6809	28.2959	27.7117	up	0.0300948	0.856832	0.907711	no	chr8	140562453	140585311	-
circRNA10336	4.56783	4.76283	5.35249	5.40365	4.85469	3.93022	9.00652	5.25115	5.62361	4.23696	5.60969	4.9883	up	0.169374	0.534173	0.666876	no	chr8	140700891	140702707	-
circRNA10337	7.23351	8.32979	10.0311	7.807	7.90896	5.50176	9.68233	8.01936	10.9116	7.31919	8.28684	8.26206	up	0.00431971	0.98198	0.988628	no	chr8	140800459	140830526	-
circRNA10338	9.7186	11.8866	13.757	11.0817	10.8241	6.87152	13.2983	10.3958	14.9573	10.1376	11.1321	11.4536	down	-0.0410759	0.842813	0.898299	no	chr8	140818277	140864399	-
circRNA10339	11.2632	13.4736	15.5907	12.8847	11.9845	7.70946	15.2988	11.9776	16.8674	11.2984	12.6303	13.0393	down	-0.0459766	0.825177	0.886744	no	chr8	140830472	140879637	-
circRNA1034	19.9763	25.6435	28.2016	23.444	30.9337	23.8104	23.927	17.2505	26.1576	29.2631	24.0817	25.6398	down	-0.0904471	0.584312	0.70713	no	chr21	15762891	15778027	+
circRNA10340	21.6769	11.9607	6.51995	12.7971	18.2589	21.2001	34.6654	35.6862	42.7911	10.8517	29.0389	14.2427	up	1.02776	0.0602902	0.162744	no	chr8	141426939	141427824	+
circRNA10341	1.43801	0	2.24401	2.50947	1.41729	1.66474	0	0.981368	2.58052	2.03735	1.45279	1.52175	down	-0.0669051	0.914913	0.945147	no	chrY	2961074	2961646	+
circRNA10342	1.23355	0.269802	2.08604	1.0131	0.507713	0.43177	0.0980567	0.318254	1.01512	0.141149	0.400869	1.02204	down	-1.35025	0.132506	0.262669	no	chrY	5030899	5057459	+
circRNA10343	5.22473	0.00666346	4.69792	2.61347	1.79569	0.423465	0	0.140808	2.69402	0.236981	0.699055	2.86769	down	-2.03641	0.0912062	0.206498	no	chrY	7042980	7087432	+
circRNA10344	7.24535	0.414903	10.7871	5.9331	14.6014	11.8686	0.0975715	8.52929	20.8183	15.3042	11.3236	7.79637	up	0.538459	0.428937	0.574195	no	chrY	7356135	7371889	+
circRNA10345	70.5163	0	70.7535	46.3357	23.8899	0.574635	0	0.440846	26.9511	0.126726	5.61866	42.2991	down	-2.91233	0.0530191	0.152214	no	chrY	12398680	12406937	-
circRNA10346	2.52888	0.00357931	3.72574	2.5053	3.36939	2.81514	0	1.55655	2.61312	4.26222	2.24941	2.42658	down	-0.10938	0.85849	0.908862	no	chrY	12725113	12760617	+
circRNA10347	3.99203	0.0050436	4.63328	3.9417	4.0463	4.17073	0	1.81525	3.63015	5.17515	2.95826	3.32367	down	-0.168031	0.776569	0.853619	no	chrY	12757192	12779646	+
circRNA10348	8.29952	0.00629176	10.0221	7.81672	10.8108	7.81765	0.0137905	3.67853	8.92238	10.7257	6.2316	7.39109	down	-0.246183	0.682465	0.78511	no	chrY	13297707	13326350	-
circRNA10349	9.13864	0	11.3668	8.60791	11.6528	8.58485	0.0191698	4.20758	10.5627	11.9321	7.06129	8.15325	down	-0.207443	0.729752	0.81976	no	chrY	13302877	13326350	-
circRNA1035	5.29599	6.18162	6.92419	5.38153	6.62466	4.58483	5.59592	4.45152	6.17805	5.97261	5.35659	6.0816	down	-0.183136	0.171311	0.310932	no	chr21	15777904	15833548	+
circRNA10350	2.26369	0	2.3673	2.13201	2.55244	2.11077	0.0248814	1.14035	2.30008	3.16622	1.74846	1.86309	down	-0.0916099	0.876644	0.920271	no	chrY	13323555	13326350	-
circRNA10351	4.7158	0	4.80691	5.78187	7.3466	6.19184	0	3.05489	6.55031	6.62588	4.48459	4.53024	down	-0.0146113	0.980277	0.987486	no	chrY	13366267	13369349	-
circRNA10352	5.57624	0	4.88509	4.13272	6.7252	4.27739	0	2.11439	3.98547	5.26046	3.12754	4.26385	down	-0.447126	0.465432	0.606584	no	chrY	19739528	19741857	-
circRNA10353	25.9942	21.8188	27.8384	23.1495	21.461	24.0504	21.4407	21.1984	22.934	21.5023	22.2251	24.0524	down	-0.113987	0.229836	0.378186	no	chrX	2243023	2291603	-
circRNA10354	0.301191	0.471615	1.03768	0.848634	1.22092	0.227901	0.059151	1.28216	1.05339	0.120623	0.548645	0.776009	down	-0.5002	0.485682	0.624925	no	chrX	9739485	9741455	-
circRNA10355	1.31901	1.3018	3.46741	2.00667	2.96197	0.570315	0.0941969	4.17644	2.23667	0.496232	1.51477	2.21137	down	-0.545842	0.455232	0.597411	no	chrX	9739485	9748666	-
circRNA10356	2.26147	1.83397	1.91265	1.88448	1.79754	0.368356	0.636793	1.31877	1.33161	0.650664	0.861238	1.93802	down	-1.1701	0.00314644	0.0485971	yes	chrX	9890977	9898290	+
circRNA10357	2.10072	1.60587	1.66219	1.62056	1.65403	0.322379	0.517305	1.12047	1.09904	0.528907	0.717621	1.72867	down	-1.26837	0.00146121	0.0430652	yes	chrX	9894358	9898290	+
circRNA10358	0.74445	0.747329	0.75168	0.899595	0.721532	0.770998	1.19849	1.73312	4.36172	0.68446	1.74976	0.772917	up	1.17877	0.223736	0.371852	no	chrX	10567002	10567603	-
circRNA10359	13.8424	14.0922	13.9385	14.1734	14.5783	18.0335	21.4052	18.4868	22.6665	17.7507	19.6685	14.125	up	0.477642	0.00474077	0.0536636	no	chrX	13749427	13755242	+
circRNA1036	60.3392	71.1863	85.8489	49.1642	63.0751	37.9557	62.8831	60.5939	99.8673	48.8019	62.0204	65.9227	down	-0.0880341	0.757509	0.83899	no	chr21	25954590	26000182	-
circRNA10360	2.1115	3.73413	2.89671	2.98634	4.29421	2.68521	4.29315	3.41278	3.78184	2.32133	3.29886	3.20458	up	0.0418341	0.860177	0.909822	no	chrX	16667514	16667724	-
circRNA10361	14.04	14.531	17.0603	15.1966	13.0494	17.3558	20.1309	16.6951	17.2814	12.0867	16.71	14.7755	up	0.177506	0.234323	0.382906	no	chrX	16852046	16853842	-
circRNA10362	8.00604	6.73052	10.7786	8.33408	10.4066	4.82324	4.25573	6.53745	6.82994	8.0158	6.09243	8.85118	down	-0.538852	0.0277735	0.110542	no	chrX	17006221	17029623	+
circRNA10363	17.5255	13.685	32.1546	20.5929	22.4654	8.7634	12.9834	58.4124	25.2487	39.5689	28.9954	21.2847	up	0.446006	0.459575	0.601556	no	chrX	17029526	17138961	+
circRNA10364	6.93809	6.11287	6.34297	6.53758	5.79691	6.34021	6.94682	5.57948	10.0565	5.52207	6.88902	6.34569	up	0.118523	0.557065	0.685451	no	chrX	19935809	19970298	-
circRNA10365	8.92269	8.64544	8.97675	10.846	15.3443	16.8168	17.7979	16.9509	12.5314	17.4315	16.3057	10.547	up	0.628538	0.00748031	0.061888	no	chrX	20164899	20177084	-
circRNA10366	2.37485	2.82234	4.00225	2.77014	3.37826	4.89723	3.8747	5.79715	5.1113	2.41433	4.41894	3.06957	up	0.525666	0.0862013	0.200146	no	chrX	21878042	21878692	+
circRNA10367	1.82925	2.90976	2.9549	2.81514	2.01105	1.80784	2.08217	1.38693	2.19655	2.24262	1.94322	2.50402	down	-0.365796	0.0935148	0.209985	no	chrX	24005989	24006700	-
circRNA10368	5.72583	7.78317	7.16037	6.25179	7.83855	9.25852	12.4488	10.9685	11.1549	6.90628	10.1474	6.95194	up	0.545622	0.0249075	0.105251	no	chrX	24062416	24068108	+
circRNA10369	5.56035	7.42925	6.36075	5.86653	7.11951	8.58999	11.9044	9.94657	10.8348	6.63472	9.58209	6.46728	up	0.567182	0.0235902	0.102237	no	chrX	24062416	24071727	+
circRNA1037	5.00065	4.54979	5.35758	5.86498	6.00434	9.81616	7.42875	7.14465	7.38798	8.81665	8.11884	5.35547	up	0.600261	0.00312703	0.0484733	no	chr21	29321221	29329693	+
circRNA10370	5.0703	7.71417	6.34173	5.62001	5.71006	8.06605	10.2408	9.56887	10.8246	5.86042	8.91214	6.09125	up	0.549032	0.0306274	0.116383	no	chrX	24064201	24068108	+
circRNA10371	4.45841	5.73586	4.49841	4.20502	4.58698	6.24824	8.82529	6.92834	8.1662	4.24198	6.88201	4.69694	up	0.55111	0.0499223	0.147363	no	chrX	24065998	24071727	+
circRNA10372	8.88938	12.9914	11.633	10.579	8.78711	8.49971	16.4068	10.2786	18.6159	8.23435	12.4071	10.576	up	0.230372	0.459214	0.601196	no	chrX	31134102	31182904	-
circRNA10373	4.70911	6.67259	5.541	4.84799	4.2693	4.0928	9.25786	5.38221	10.1768	3.9669	6.57531	5.208	up	0.33633	0.368922	0.518318	no	chrX	31169443	31182904	-
circRNA10374	0.394753	0.164832	0.60446	0.431421	0.317394	0.113789	0	0.560151	0	1.73903	0.482594	0.382572	up	0.33508	0.781033	0.856524	no	chrX	36098793	36104691	+
circRNA10375	9.86639	10.9495	11.1247	12.624	13.1924	13.6641	14.4647	13.7129	12.9698	14.1483	13.792	11.5514	up	0.25576	0.0165232	0.0861757	no	chrX	41144522	41151057	+
circRNA10376	9.44635	12.4573	15.7061	12.2889	9.14386	12.8823	15.9639	16.0843	13.8388	12.2991	14.2137	11.8085	up	0.267455	0.136237	0.267263	no	chrX	41214568	41217343	+
circRNA10377	15.6754	23.2494	21.2806	12.6962	11.0343	11.64	11.9652	9.30333	16.4178	7.98994	11.4633	16.7872	down	-0.550344	0.0996234	0.217928	no	chrX	47239790	47240876	+
circRNA10378	21.0686	23.1529	25.6102	21.7557	19.8706	20.6515	20.3855	17.7444	20.0995	15.1845	18.8131	22.2916	down	-0.244763	0.0417456	0.135212	no	chrX	53542443	53549505	-
circRNA10379	8.43025	14.2783	12.5426	13.3322	9.70209	10.7637	12.6528	11.9454	16.0713	9.5593	12.1985	11.6571	up	0.0654971	0.73831	0.825492	no	chrX	53561756	53562929	-
circRNA1038	4.15278	3.89389	4.56596	4.74848	4.95935	8.02825	5.89995	6.17207	6.27164	6.94846	6.66407	4.46409	up	0.578037	0.00221933	0.0452119	no	chr21	29326059	29329693	+
circRNA10380	1.76111	2.34002	2.37589	1.6469	1.67096	1.1409	1.49756	2.15471	1.90744	1.01796	1.54372	1.95898	down	-0.343694	0.16883	0.308109	no	chrX	54133773	54136590	-
circRNA10381	16.0397	19.1356	16.026	13.1472	13.1728	12.3844	9.00013	10.5524	23.759	17.4663	14.6325	15.5043	down	-0.0834923	0.775908	0.853151	no	chrX	57431918	57447039	+
circRNA10382	2.04318	2.65769	2.57583	2.52975	2.66912	2.12534	2.1208	2.3291	2.68307	2.24098	2.29986	2.49511	down	-0.117561	0.244556	0.393806	no	chrX	63697125	63706449	-
circRNA10383	12.9209	12.486	12.3207	16.9452	19.4418	13.3443	12.9958	15.0367	16.3399	17.4829	15.0399	14.8229	up	0.020968	0.900618	0.936186	no	chrX	75098942	75114834	-
circRNA10384	12.8631	12.6845	14.0874	10.6632	16.502	12.0908	17.3961	17.6423	16.293	15.6771	15.8199	13.3601	up	0.243811	0.113575	0.237104	no	chrX	77557451	77593849	-
circRNA10385	12.017	11.9138	14.8957	11.3942	14.5986	11.1089	15.9085	17.0141	15.0358	16.173	15.0481	12.9639	up	0.215083	0.143399	0.276498	no	chrX	77593696	77618981	-
circRNA10386	15.6515	15.3939	19.2124	20.859	12.7744	40.0037	53.1132	60.6686	49.6074	28.9856	46.4757	16.7783	up	1.46988	0.00444046	0.0525945	yes	chrX	78122835	78123374	+
circRNA10387	0.921852	2.21332	2.45668	1.32232	1.20445	0.996477	0.769433	0.0891886	14.7297	1.19987	3.55694	1.62372	up	1.13133	0.529248	0.662713	no	chrX	85303406	85308216	-
circRNA10388	122.741	126.683	148.816	128.302	159.235	168.124	188.725	189.687	182.267	161.382	178.037	137.156	up	0.376364	0.00231724	0.0452184	no	chrX	85978767	86027557	-
circRNA10389	0.0880135	0.294004	0.279905	0.0721415	0.530741	0.494719	0.518551	0.851524	0.398356	0.704966	0.593623	0.252961	up	1.23063	0.0192605	0.0924186	yes	chrX	101101058	101109998	+
circRNA1039	4.65472	4.56636	4.63511	4.22754	5.22235	6.76422	6.77517	5.93001	7.22948	5.57104	6.45399	4.66121	up	0.469485	0.00194046	0.0438843	no	chr21	29329487	29329693	+
circRNA10390	0.505324	0.422002	0.357124	0.414197	0.406296	0.262191	0.238178	0.312895	0.0831687	0.161901	0.211667	0.420989	down	-0.991988	0.00348916	0.0493617	no	chrX	105405798	105406060	+
circRNA10391	3.72121	7.68582	6.4121	3.81722	2.6714	0	0.0522008	0	0.0820251	0	0.0268452	4.86155	down	-7.50061	0.00669715	0.0601012	yes	chrX	105921964	105925031	+
circRNA10392	9.47918	9.00856	11.911	10.6691	13.5042	14.0582	16.4419	16.9393	17.2619	15.5204	16.0443	10.9144	up	0.555831	0.00127242	0.041835	no	chrX	111717846	111735122	+
circRNA10393	12.5354	15.346	16.0231	12.0499	16.1169	2.24778	2.127	3.17372	4.74383	3.64347	3.18716	14.4142	down	-2.17715	2.41888e-05	0.0243108	yes	chrX	117909301	117945575	-
circRNA10394	2.13862	2.47661	2.82982	3.13737	3.52379	3.27653	4.16836	2.50813	3.21761	3.91254	3.41663	2.82124	up	0.276245	0.156125	0.292919	no	chrX	118387340	118410959	+
circRNA10395	4.72984	4.08766	14.4798	4.4065	23.137	17.453	11.9274	10.8666	4.3426	17.6005	12.438	10.1682	up	0.290695	0.630447	0.742752	no	chrX	118542725	118561517	+
circRNA10396	5.42164	5.51881	6.35626	7.19577	8.33748	10.9179	6.94306	7.50429	6.74488	8.54381	8.13079	6.56599	up	0.308382	0.13821	0.269827	no	chrX	118741017	118776511	+
circRNA10397	13.3496	14.1035	12.2482	10.3194	20.8441	18.5447	14.2163	10.6785	10.2439	15.4185	13.8204	14.173	down	-0.0363437	0.885034	0.925671	no	chrX	119640692	119653040	-
circRNA10398	2.24218	3.4811	3.97783	3.18559	3.50723	4.58298	5.99401	8.38795	6.05543	5.06126	6.01633	3.27879	up	0.875721	0.0103264	0.0702658	no	chrX	120542966	120547239	-
circRNA10399	6.67416	8.08061	6.61174	8.82299	7.33463	5.21708	6.79984	7.46667	8.32243	5.2758	6.61636	7.50482	down	-0.18178	0.269363	0.419803	no	chrX	129515687	129518447	-
circRNA104	11.4338	6.04484	9.77515	12.8986	10.6899	6.91601	7.35262	6.58398	3.77479	8.75519	6.67652	10.1685	down	-0.606932	0.0414654	0.134745	no	chr13	95177707	95207925	-
circRNA1040	5.43769	5.78041	6.08612	5.80518	6.29842	9.52038	10.7262	9.92644	11.8985	8.6716	10.1486	5.88156	up	0.787013	0.000975775	0.0396187	no	chr21	33340999	33349543	+
circRNA10400	8.65051	5.6559	5.71408	8.04616	7.0591	8.0051	9.28285	8.74882	6.65293	5.31231	7.6004	7.02515	up	0.113546	0.558656	0.686653	no	chrX	129810905	129814795	-
circRNA10401	9.6624	5.86077	19.0552	8.5915	10.522	5.86362	3.40903	0.157445	7.25392	4.77938	4.29268	10.7384	down	-1.32282	0.0425495	0.136478	yes	chrX	133324145	133324536	-
circRNA10402	9.61715	7.17489	7.69036	9.82692	15.9226	13.8145	15.3586	25.0868	13.843	14.2066	16.4619	10.0464	up	0.712454	0.0463909	0.142395	no	chrX	135556168	135575226	+
circRNA10403	6.40088	6.61233	7.00812	7.06921	8.91834	6.24249	7.69368	10.2976	6.87445	8.09492	7.84064	7.20178	up	0.122618	0.464475	0.605838	no	chrX	150614589	150649901	+
circRNA10404	8.22148	8.52013	9.72706	9.02068	10.7349	11.8598	10.8581	14.996	9.87672	11.6516	11.8485	9.24486	up	0.357975	0.0363138	0.126114	no	chrX	150699195	150755865	+
circRNA10405	27.8147	27.7972	33.07	27.4949	28.1908	28.2084	35.0344	46.998	29.8219	25.3982	33.0922	28.8735	up	0.196743	0.338996	0.489928	no	chrX	150793691	150816078	-
circRNA10406	10.5731	13.6579	14.3998	11.6334	14.2952	15.6328	15.3324	27.5878	16.1514	13.6767	17.6762	12.9119	up	0.45311	0.132656	0.262862	no	chrX	155506898	155545277	-
circRNA10407	3.84243	3.8149	4.46982	4.14389	4.74925	4.10063	3.60573	4.41575	4.29868	3.88801	4.06176	4.20406	down	-0.0496776	0.557151	0.685451	no	chr13	19993063	20006586	+
circRNA10408	14.3189	15.091	18.4885	15.7686	18.6599	14.0646	16.055	17.2552	16.726	15.4894	15.918	16.4654	down	-0.0487742	0.618389	0.733861	no	chr13	20026612	20059562	+
circRNA10409	19.2958	16.6652	22.7042	18.856	21.222	17.0161	18.686	23.1809	19.3761	17.8995	19.2317	19.7486	down	-0.0382663	0.736495	0.824475	no	chr13	20064451	20083776	+
circRNA1041	4.66823	5.35737	5.1786	4.76793	5.77963	12.2788	7.69882	10.2303	9.3856	6.08237	9.13518	5.15035	up	0.826762	0.0186047	0.0908989	no	chr21	33432177	33432871	+
circRNA10410	52.0508	70.1024	69.4053	68.5266	28.0609	32.847	44.9566	40.4657	19.6013	28.4164	33.2574	57.6292	down	-0.793125	0.0377765	0.128451	no	chr13	20432102	20439754	-
circRNA10411	6.904	8.1561	10.0361	7.73262	6.73603	7.31525	9.02939	8.80464	7.22359	6.65448	7.80547	7.91297	down	-0.0197334	0.890489	0.929272	no	chr13	20631016	20644958	+
circRNA10412	2.52511	1.77579	1.03316	1.90634	2.03026	1.49405	1.51382	0.822913	1.42177	1.9161	1.43373	1.85413	down	-0.37097	0.199892	0.344459	no	chr13	21301419	21301618	+
circRNA10413	15.7779	12.373	13.4186	23.926	15.6975	8.75482	8.91809	6.30046	13.9	11.4376	9.86219	16.2386	down	-0.719447	0.0340136	0.122132	no	chr13	23590150	23626792	+
circRNA10414	0.921651	1.34331	1.11514	0.965686	1.36323	1.01506	1.6962	1.3695	1.94978	1.5809	1.52229	1.1418	up	0.414928	0.0790867	0.190333	no	chr13	24899419	24913091	-
circRNA10415	7.064	7.59711	8.01632	6.47354	9.48084	6.99634	9.14921	9.60031	9.56261	8.30882	8.72346	7.72636	up	0.175111	0.196163	0.340456	no	chr13	28256292	28280541	+
circRNA10416	7.86011	8.23155	8.81802	7.30068	10.4415	7.84762	10.3606	10.7404	10.6759	9.35081	9.79507	8.53038	up	0.199446	0.137786	0.269397	no	chr13	28260447	28280541	+
circRNA10417	16.5451	23.2919	19.0654	14.7991	18.9084	6.81589	19.2607	11.4468	25.8654	9.96285	14.6703	18.522	down	-0.336337	0.349039	0.498981	no	chr13	32078834	32117473	+
circRNA10418	13.3265	16.7649	14.15	9.476	14.6532	4.98732	12.931	8.4027	20.6019	7.24127	10.8328	13.6741	down	-0.336037	0.385312	0.533923	no	chr13	32078834	32161251	+
circRNA10419	7.59431	12.6669	11.3808	5.97562	10.1851	2.8799	8.69163	4.78186	14.4473	4.98594	7.15734	9.56054	down	-0.41767	0.350376	0.5004	no	chr13	32194143	32202527	+
circRNA1042	3.228	3.97156	4.65645	3.38481	2.64217	4.14944	3.72373	2.49845	2.34528	2.77189	3.09776	3.5766	down	-0.207363	0.360922	0.510177	no	chr21	33534579	33539356	-
circRNA10420	10.4776	11.7895	8.10628	9.94416	14.0997	16.9052	15.1079	12.1644	11.4812	15.3579	14.2033	10.8834	up	0.384097	0.0489155	0.145942	no	chr13	32415959	32420576	-
circRNA10421	7.88426	9.1177	10.4413	8.43118	10.8702	6.04427	13.091	8.4337	12.137	9.70331	9.88187	9.34892	up	0.0799842	0.716148	0.809764	no	chr13	32683878	32710106	+
circRNA10422	7.7784	9.08727	10.5208	7.23223	9.48349	7.01661	11.3737	8.25764	12.532	9.05675	9.64733	8.82044	up	0.129279	0.505456	0.643016	no	chr13	32732101	32760720	+
circRNA10423	8.07773	5.92942	4.43799	14.8634	1.71471	1.37942	3.00674	1.13399	15.8811	1.1388	4.508	7.00466	down	-0.635827	0.511604	0.648184	no	chr13	33053767	33054277	+
circRNA10424	6.32716	5.84421	7.33786	6.41709	8.13867	4.75931	6.26848	8.90985	8.83373	8.06481	7.36723	6.813	up	0.112833	0.563074	0.689641	no	chr13	35155774	35232619	+
circRNA10425	5.0683	4.49912	6.29649	5.4934	6.76239	3.50141	5.55435	6.71058	6.54923	5.49899	5.56291	5.62394	down	-0.01574	0.933176	0.957268	no	chr13	35164356	35177103	+
circRNA10426	17.192	17.4492	21.3661	23.64	21.9137	14.6922	22.8577	18.3929	19.7662	22.4884	19.6395	20.3122	down	-0.0485879	0.741083	0.827223	no	chr13	37044078	37051583	-
circRNA10427	15.7623	16.3881	21.0716	15.6899	13.2283	9.90689	11.9767	11.5346	10.2924	11.3776	11.0176	16.428	down	-0.576348	0.0110499	0.072081	no	chr13	41727194	41833531	-
circRNA10428	8.98035	9.66149	11.5919	9.22492	7.52639	5.68901	6.93193	6.81474	6.00413	6.69441	6.42684	9.39702	down	-0.548093	0.00779237	0.0627245	no	chr13	41777985	41819386	-
circRNA10429	18.4898	18.9728	28.0329	19.6512	16.1877	11.5617	14.6541	12.9884	11.763	14.9602	13.1855	20.2669	down	-0.620179	0.0217633	0.0983057	no	chr13	41777985	41868477	-
circRNA1043	5.70529	6.34144	6.92448	5.35399	7.10636	4.5835	6.61588	7.3234	7.13402	6.78313	6.48799	6.28631	up	0.0455568	0.74541	0.830449	no	chr21	39209995	39255828	-
circRNA10430	19.078	19.5482	30.1826	20.5078	16.7394	11.911	15.0768	13.125	11.8909	15.6472	13.5302	21.2112	down	-0.648644	0.0267521	0.108637	no	chr13	41811225	41868477	-
circRNA10431	3.02314	2.0362	2.68333	2.27513	4.99287	5.08642	5.47836	4.60344	4.74564	4.74173	4.93112	3.00213	up	0.715927	0.0187352	0.0911372	no	chr13	42165331	42168818	+
circRNA10432	2.53217	2.16295	3.19715	2.89308	5.86216	7.62527	7.57483	5.73567	6.49152	7.70061	7.02558	3.3295	up	1.07731	0.00229483	0.0452184	yes	chr13	42199566	42209072	+
circRNA10433	3.62803	1.84978	3.17802	3.13028	5.84944	19.2866	17.4603	16.5803	4.25839	20.1132	15.5397	3.52711	up	2.1394	0.012672	0.0760099	yes	chr13	42953948	42964139	-
circRNA10434	0	0.0297153	0.352057	0.087497	0.200265	0.215392	0.195666	0.385568	0.0878448	0.541512	0.285196	0.133907	up	1.09073	0.180235	0.321557	no	chr13	46227512	46228733	+
circRNA10435	21.3273	27.1572	25.706	26.0857	24.9503	21.9182	28.1538	17.0391	20.6651	27.6738	23.09	25.0453	down	-0.117273	0.438771	0.5829	no	chr13	46694893	46701207	+
circRNA10436	9.62256	9.512	10.7596	10.2211	10.7461	12.054	11.6967	11.6128	12.1636	11.8477	11.875	10.1723	up	0.223282	0.00166208	0.0431772	no	chr13	49168613	49188633	+
circRNA10437	4.2504	5.31283	5.47813	3.82077	4.28841	4.34417	3.87133	4.23044	3.33544	5.08243	4.17276	4.63011	down	-0.150042	0.32236	0.474116	no	chr13	49467864	49490910	+
circRNA10438	3.28767	3.04226	2.25387	3.29974	3.68808	5.42851	6.8432	4.86158	3.86925	4.71962	5.14443	3.11432	up	0.724093	0.01068	0.0710266	no	chr13	49993793	49997419	-
circRNA10439	16.1152	14.4951	16.2392	20.9068	23.4324	39.1864	56.5202	38.9053	34.8471	43.1543	42.5227	18.2377	up	1.22131	0.00135501	0.0426798	yes	chr13	49997074	50045232	-
circRNA1044	0.924385	1.05232	1.07212	0.907932	1.06117	0.811819	0.974591	1.1809	1.31525	0.778838	1.01228	1.00358	up	0.0124449	0.940117	0.961546	no	chr21	39218152	39218660	-
circRNA10440	6.8394	7.91608	8.33174	5.9828	7.28456	7.55292	7.05708	9.33989	9.60454	7.13748	8.13838	7.27092	up	0.162604	0.246315	0.395639	no	chr13	60439688	60510755	+
circRNA10441	7.44242	5.99359	3.5457	5.79307	6.37692	0.187714	1.62402	1.01435	5.67675	0.326446	1.76586	5.83034	down	-1.72321	0.0120981	0.0743672	yes	chr13	71557024	71573573	-
circRNA10442	2.11753	2.50099	2.61865	2.89829	2.62681	3.01705	2.96781	3.28238	4.31493	3.35987	3.38841	2.55245	up	0.408723	0.0225391	0.100067	no	chr13	72773684	72777493	-
circRNA10443	61.674	83.3977	68.0282	67.3674	82.9208	50.5258	84.9022	60.6866	79.8087	63.1992	67.8245	72.6776	down	-0.0997047	0.550078	0.680292	no	chr13	73764938	73846373	-
circRNA10444	8.62611	9.2384	11.7294	5.90419	6.49725	1.43729	3.37518	2.47006	3.51845	2.65713	2.69162	8.39907	down	-1.64175	0.00356852	0.0495831	yes	chr13	75336921	75362607	-
circRNA10445	7.87761	8.29016	9.43638	5.24373	5.59696	1.2722	2.99312	2.04894	3.12791	2.42425	2.37328	7.28897	down	-1.61883	0.0019684	0.0440984	yes	chr13	75349170	75362607	-
circRNA10446	6.51845	9.38101	9.67191	10.4784	10.0495	9.85089	9.84357	9.09041	11.1971	9.7579	9.94797	9.21986	up	0.109657	0.387405	0.536205	no	chr13	75560753	75569507	+
circRNA10447	25.8424	45.702	41.8515	16.7023	16.5363	6.90969	6.22393	6.74636	18.1013	7.11269	9.01879	29.3269	down	-1.70122	0.026654	0.108411	yes	chr13	75727029	75761038	+
circRNA10448	14.2958	19.9082	19.7478	11.7566	9.85634	4.72775	5.17021	2.00826	23.85	5.8488	8.32101	15.113	down	-0.860955	0.17666	0.317567	no	chr13	75817161	75834387	+
circRNA10449	8.1552	8.94179	9.49423	8.63962	13.7624	12.898	13.7821	11.9065	12.4347	15.0124	13.2067	9.79865	up	0.430616	0.0246704	0.104803	no	chr13	77139196	77225554	-
circRNA1045	1.66354	1.77194	2.40419	1.58615	1.90594	1.20255	2.24705	2.56419	1.93283	2.04748	1.99882	1.86635	up	0.0989278	0.637216	0.748144	no	chr21	39228500	39229436	-
circRNA10450	4.24706	4.71094	5.41573	4.09647	7.45868	6.63688	7.4019	6.15463	6.3651	8.20617	6.95293	5.18578	up	0.423062	0.0455588	0.141004	no	chr13	77188951	77243951	-
circRNA10451	7.87869	7.27813	7.71601	7.29672	8.89339	7.19708	8.43949	9.33517	10.2368	9.66432	8.97457	7.81259	up	0.200043	0.102354	0.222004	no	chr13	79341123	79344794	-
circRNA10452	11.0079	5.89014	9.58686	12.9062	10.8433	8.4512	7.15438	8.47464	4.81214	9.88962	7.7564	10.0469	down	-0.373287	0.155225	0.291757	no	chr13	95034605	95062859	-
circRNA10453	22.3231	11.3891	20.9772	24.5414	22.6234	15.0477	15.4247	14.9548	7.96247	19.2699	14.5319	20.3708	down	-0.487281	0.085165	0.198804	no	chr13	95071662	95207925	-
circRNA10454	3.01767	1.62136	2.85673	3.10315	2.90633	2.032	2.22422	2.1094	1.08772	2.2907	1.94881	2.70105	down	-0.470926	0.0658824	0.17133	no	chr13	95161189	95178091	-
circRNA10455	5.97947	3.13636	5.6681	6.16414	5.3461	3.953	4.01242	3.90959	2.13085	4.59261	3.7197	5.25883	down	-0.499558	0.0581913	0.159246	no	chr13	95161189	95194937	-
circRNA10456	5.92736	3.44733	5.95497	5.8087	5.43174	3.69449	4.43907	4.31393	2.12434	4.86774	3.88792	5.31402	down	-0.450807	0.0677139	0.173899	no	chr13	95170532	95188542	-
circRNA10457	6.92629	2.59145	5.34556	9.50844	6.2159	4.86768	4.93283	4.47105	2.95323	5.18369	4.4817	6.11753	down	-0.448903	0.228069	0.376557	no	chr13	95206532	95210781	-
circRNA10458	1.67226	2.65829	3.25208	2.1943	1.50966	4.23048	3.67825	3.95561	5.83048	2.74937	4.08884	2.25732	up	0.857081	0.0185711	0.0908484	no	chr13	95760040	95760798	+
circRNA10459	19.1086	17.8217	22.5183	15.6097	19.8569	13.9065	17.7646	18.0056	25.6531	12.8064	17.6272	18.9831	down	-0.106907	0.611072	0.728361	no	chr13	95832927	95859675	-
circRNA1046	8.424	9.21247	5.8425	7.64108	8.2035	6.35718	5.52013	6.54038	4.65024	7.61353	6.13629	7.86471	down	-0.358027	0.0515212	0.149923	no	chr21	44079564	44080127	+
circRNA10460	7.3126	6.70703	8.5723	7.08069	8.72044	5.63905	8.79484	8.25489	13.3883	6.92704	8.60083	7.67861	up	0.16363	0.534388	0.667024	no	chr13	95983804	95999307	-
circRNA10461	82.3866	85.1708	127.975	72.0465	65.7414	49.6246	69.9701	48.3608	99.1745	68.9166	67.2093	86.664	down	-0.36677	0.211045	0.357727	no	chr13	98343762	98412034	+
circRNA10462	14.0372	19.4893	18.1191	11.7111	11.3569	9.70487	8.44206	8.38061	16.23	9.82818	10.5171	14.9427	down	-0.506702	0.0805604	0.192259	no	chr13	98431043	98431280	+
circRNA10463	13.3972	16.3	16.7906	11.2228	18.5361	13.5897	34.8784	41.992	59.301	26.0044	35.1531	15.2493	up	1.20491	0.0595881	0.161666	no	chr13	98897488	98915503	-
circRNA10464	15.7848	15.4674	10.4823	14.7228	8.89858	10.3552	11.4794	9.61938	14.8933	9.88203	11.2459	13.0712	down	-0.216993	0.321346	0.473215	no	chr13	99866240	99871062	+
circRNA10465	16.1159	15.6348	17.538	16.3229	13.4385	10.5878	11.914	13.5003	24.1546	10.7406	14.1794	15.81	down	-0.157037	0.565623	0.691978	no	chr13	100262729	100330671	+
circRNA10466	31.1597	35.2151	34.7168	34.3124	28.0658	24.7745	23.5697	25.0351	48.1182	24.8561	29.2707	32.694	down	-0.159566	0.518954	0.654231	no	chr13	100301460	100449305	+
circRNA10467	0.376488	0.503056	0.745004	0.493751	2.39139	0.195343	0.118302	0.5828	2.54053	0.0904672	0.705489	0.901938	down	-0.354405	0.752298	0.835362	no	chr13	101124608	101144896	-
circRNA10468	3.63158	4.30601	4.08367	4.16752	5.74912	4.98482	6.36771	5.68903	6.50333	6.37034	5.98305	4.38758	up	0.447454	0.00905535	0.0661245	no	chr13	102627012	102640376	+
circRNA10469	4.48648	5.14661	6.50774	4.9914	5.4182	4.72701	5.3539	7.07861	8.22505	7.92865	6.66264	5.31009	up	0.327359	0.132451	0.262606	no	chr13	102807146	102831697	+
circRNA1047	17.4662	17.8723	15.2189	22.5983	20.6364	10.9329	17.6366	8.16429	11.5321	18.9617	13.4455	18.7584	down	-0.480413	0.0676845	0.173899	no	chr21	44094063	44098534	+
circRNA10470	28.806	30.6449	25.8416	25.7748	31.0668	25.7006	49.9278	37.9073	43.0751	30.592	37.4406	28.4268	up	0.39735	0.105018	0.22588	no	chr13	111205289	111244294	+
circRNA10471	13.978	15.918	16.1342	16.183	17.5512	16.9544	17.4859	18.5164	22.7685	18.8178	18.9086	15.9529	up	0.245226	0.0433727	0.137731	no	chr13	113233177	113244514	+
circRNA10472	3.62955	4.19851	3.84808	3.62021	4.25473	4.55292	4.32549	2.29443	5.35698	2.77935	3.86184	3.91022	down	-0.0179617	0.938041	0.960255	no	chr13	113534045	113539507	+
circRNA10473	11.5135	11.2461	11.8294	11.8942	15.8634	13.4272	15.9664	15.6656	15.5652	20.7425	16.2734	12.4693	up	0.384133	0.0358802	0.125334	no	chr12	306946	350779	-
circRNA10474	6.95693	9.91524	9.4362	6.90625	10.0094	4.67766	7.81306	8.1564	9.59478	9.46979	7.94234	8.64481	down	-0.12227	0.553988	0.683159	no	chr12	925450	933076	-
circRNA10475	33.6893	35.5102	46.4104	36.0867	36.933	27.1185	34.5571	35.8224	33.3157	41.765	34.5158	37.7259	down	-0.128301	0.351316	0.501463	no	chr12	1115866	1408247	+
circRNA10476	1.10621	1.36861	1.90902	1.5802	1.46684	0.871713	1.45331	1.30267	1.38871	1.60509	1.3243	1.48618	down	-0.166378	0.395934	0.544473	no	chr12	1180540	1190052	+
circRNA10477	77.5049	86.9507	99.2378	90.377	84.802	63.2764	80.0018	77.8516	76.5539	88.7586	77.2885	87.7745	down	-0.183548	0.0901918	0.205134	no	chr12	1289852	1371977	+
circRNA10478	0.49478	0.47886	0.368647	0.292376	0.222038	0.169157	0.167223	0.13359	0.18938	0.12903	0.157676	0.37134	down	-1.23578	0.0138579	0.079286	yes	chr12	4626496	4628805	-
circRNA10479	0.165608	0.095082	0.277967	0.593875	1.3038	1.60218	2.17097	2.41138	1.33727	1.40938	1.78624	0.487266	up	1.87414	0.00292516	0.0477288	yes	chr12	7396095	7406852	-
circRNA1048	26.9561	30.4819	27.0636	19.8899	21.3095	10.6971	18.5935	11.4795	20.039	28.2815	17.8181	25.1402	down	-0.496649	0.0951766	0.211992	no	chr7	579256	711527	-
circRNA10480	0.876342	0.613711	1.71169	2.40378	5.91425	5.68668	9.13649	7.96369	3.46669	5.17326	6.28536	2.30395	up	1.44788	0.0212416	0.0971124	yes	chr12	7403535	7433694	-
circRNA10481	10.3559	11.7233	6.42422	7.16793	9.8992	5.89063	6.13152	5.07641	9.32695	6.83333	6.65177	9.1141	down	-0.454362	0.0847651	0.198174	no	chr12	8713811	8714041	+
circRNA10482	0.471836	1.33972	1.55613	1.41807	1.20134	1.08807	2.28571	0.852129	1.03543	1.88964	1.4302	1.19742	up	0.256283	0.512026	0.648363	no	chr12	11047020	11047188	-
circRNA10483	18.4817	16.077	13.814	16.2521	8.82075	0.0762621	0.535748	0.0409545	0.667667	0.0847643	0.281079	14.6891	down	-5.70763	0.000888984	0.0390989	yes	chr12	18488449	18567057	+
circRNA10484	28.3838	34.8626	34.9078	33.1946	42.7018	33.4174	40.9351	39.5508	45.9799	48.6427	41.7052	34.8101	up	0.26072	0.0858311	0.199604	no	chr12	19500097	19514784	+
circRNA10485	3.00139	3.78629	8.2569	4.81602	6.9533	1.75965	7.49515	2.79554	5.191	3.46344	4.14096	5.36278	down	-0.373017	0.4103	0.557748	no	chr12	21906126	21915910	-
circRNA10486	10.8623	10.5137	11.6778	9.54681	13.104	8.77918	12.4412	12.5871	11.5835	13.6408	11.8064	11.1409	up	0.0836945	0.53356	0.66635	no	chr12	22482557	22518137	-
circRNA10487	12.5412	12.0127	12.8402	10.9032	14.7685	10.0543	14.3173	14.1413	12.7743	15.6737	13.3922	12.6131	up	0.0864618	0.517599	0.653274	no	chr12	22484697	22518137	-
circRNA10488	2.93314	3.91313	3.53432	3.16452	2.11303	0.917936	0.998143	1.61805	1.31557	1.27191	1.22432	3.13163	down	-1.35493	0.00175698	0.0433415	yes	chr12	26064498	26067713	+
circRNA10489	11.919	12.3727	12.6076	12.0947	8.79885	9.05463	6.04135	8.44717	4.64818	7.03735	7.04573	11.5586	down	-0.714141	0.00291127	0.0476379	no	chr12	26411320	26443650	-
circRNA1049	8.69701	9.236	7.02642	5.9497	5.09763	2.47516	5.10225	2.28364	3.99749	7.39619	4.25095	7.20135	down	-0.760484	0.0437781	0.138393	no	chr7	677229	711527	-
circRNA10490	18.2731	20.5086	20.8746	19.1062	13.4526	14.4978	11.2869	11.7806	7.90562	11.5316	11.4005	18.443	down	-0.693977	0.00360065	0.0496131	no	chr12	26427913	26477007	-
circRNA10491	15.4843	16.44	16.198	15.7079	11.725	11.9175	8.35901	9.53839	6.79415	9.71612	9.26503	15.111	down	-0.705736	0.00128592	0.041835	no	chr12	26481131	26655852	-
circRNA10492	5.0789	5.44794	5.20356	5.11153	3.57141	3.81078	2.74774	3.03105	1.98005	3.01763	2.91745	4.88267	down	-0.742962	0.00232836	0.0452184	no	chr12	26550247	26632059	-
circRNA10493	7.43308	8.41552	8.49317	7.75599	5.75058	6.05341	4.26011	4.66092	3.26013	4.60887	4.56869	7.56967	down	-0.72845	0.00209422	0.0448814	no	chr12	26599145	26655852	-
circRNA10494	8.36418	9.01393	9.35071	7.55742	6.41801	6.31609	4.40066	4.9998	3.6886	5.05336	4.8917	8.14085	down	-0.734842	0.00159358	0.0431249	no	chr12	26628033	26716242	-
circRNA10495	3.91425	4.2993	4.27427	4.33826	3.30036	3.26684	1.8617	2.15383	1.5813	2.24363	2.22146	4.02529	down	-0.857583	0.00120964	0.0414224	no	chr12	26681874	26686632	-
circRNA10496	3.30109	4.24396	4.41966	3.10155	2.38891	2.76194	2.33653	2.09526	1.78794	2.27393	2.25112	3.49103	down	-0.633011	0.026293	0.107781	no	chr12	26711173	26716242	-
circRNA10497	19.0117	15.6467	14.4674	24.5636	16.2217	17.4313	21.9025	25.8559	11.7628	26.2054	20.6316	17.9822	up	0.198283	0.445008	0.588643	no	chr12	26982773	26990627	-
circRNA10498	11.3306	9.94077	13.7981	12.3249	14.3588	7.07243	14.9202	11.1189	24.5717	17.5199	15.0406	12.3506	up	0.284282	0.42481	0.570636	no	chr12	27654722	27656730	+
circRNA10499	9.25674	12.0558	10.5917	9.86365	6.53894	6.51825	10.6133	8.13701	10.8097	10.6979	9.35524	9.66137	down	-0.046452	0.813692	0.87896	no	chr12	27719808	27724186	+
circRNA105	4.12691	3.18217	5.09076	3.97512	2.92448	1.90537	4.19438	7.45314	2.79173	2.53985	3.77689	3.85989	down	-0.0313583	0.940738	0.96204	no	chr13	95611445	95612177	-
circRNA1050	14.8855	15.2227	12.5172	13.9471	12.9032	8.6276	10.9455	15.3508	16.6145	11.0476	12.5172	13.8952	down	-0.15067	0.424277	0.570194	no	chr7	854920	857957	+
circRNA10500	13.3113	10.2404	15.8919	13.0914	15.8432	9.50063	9.26211	9.28246	16.8629	7.99556	10.5807	13.6756	down	-0.370167	0.14894	0.283512	no	chr12	31293805	31298224	-
circRNA10501	1.33379	1.13846	1.07945	1.73831	1.28862	0.929698	1.34113	1.58112	1.29465	1.38032	1.30538	1.31573	down	-0.0113875	0.948997	0.967444	no	chr12	31442775	31460381	-
circRNA10502	4.8064	5.55768	6.93415	4.69511	6.40814	4.51643	5.14681	6.2827	7.3876	4.27542	5.52179	5.68029	down	-0.0408283	0.833628	0.892306	no	chr12	31689007	31709425	-
circRNA10503	3.50139	4.04673	3.78648	4.30527	9.55818	9.56875	9.48147	8.18487	11.6394	14.4578	10.6664	5.03961	up	1.0817	0.00741728	0.0618206	yes	chr12	31970189	31987322	+
circRNA10504	1.82922	2.18389	1.76249	2.02735	4.76127	4.16115	4.63792	4.09782	5.81713	6.99384	5.14157	2.51284	up	1.03289	0.0107181	0.071135	yes	chr12	31980878	31987322	+
circRNA10505	17.9803	21.2906	25.6941	15.524	18.6936	18.1138	15.1529	24.5483	23.0467	24.1892	21.0102	19.8365	up	0.0829264	0.656677	0.764611	no	chr12	32564137	32611283	+
circRNA10506	4.97746	6.78252	10.2498	3.98538	5.55033	4.92099	4.76833	4.59962	6.23401	10.0411	6.11281	6.3091	down	-0.0455993	0.898525	0.934711	no	chr12	40028301	40048210	-
circRNA10507	2.93791	4.06634	4.24497	2.95247	4.19916	6.54754	11.2672	6.695	3.82108	12.4362	8.1534	3.68017	up	1.14763	0.0482213	0.14525	yes	chr12	40313972	40335157	+
circRNA10508	3.92068	3.64088	3.78159	4.368	3.07305	2.4321	2.79724	2.51209	2.49467	3.20031	2.68728	3.75684	down	-0.483373	0.00391831	0.0506587	no	chr12	50427762	50454417	+
circRNA10509	2.04984	2.21319	2.10611	2.35897	2.68147	1.78066	1.60743	1.43935	1.4097	2.08857	1.66514	2.28191	down	-0.454599	0.00649251	0.0592869	no	chr12	50430495	50435624	+
circRNA1051	1.78679	2.31245	2.36137	1.83332	2.90369	2.58794	2.02599	3.40533	2.17845	3.41411	2.72236	2.23953	up	0.281667	0.219766	0.367306	no	chr7	5739276	5741815	-
circRNA10510	5.16471	4.64888	4.86163	5.66504	3.9981	3.15551	3.63757	3.15753	3.21505	3.93169	3.41947	4.86767	down	-0.509458	0.00337307	0.0489219	no	chr12	50430495	50453672	+
circRNA10511	4.75262	4.30502	4.43982	5.26466	3.68779	2.93325	3.33832	2.94576	2.9865	3.61731	3.16423	4.48998	down	-0.504856	0.00394833	0.0508426	no	chr12	50430495	50454417	+
circRNA10512	12.7659	8.83377	9.35329	12.8018	8.7396	6.93223	7.04101	7.8795	5.10556	8.5541	7.10248	10.4989	down	-0.563839	0.0189969	0.0916605	no	chr12	50430495	50474167	+
circRNA10513	11.6247	11.461	13.8633	12.3228	13.2478	10.9268	11.2523	11.9755	11.7875	13.3652	11.8615	12.5039	down	-0.0760972	0.334542	0.485734	no	chr12	50780140	50814439	+
circRNA10514	22.6577	22.0259	20.5986	21.3086	18.7231	26.9384	19.6663	28.5293	22.2354	28.5354	25.181	21.0628	up	0.257639	0.0837251	0.196896	no	chr12	50981639	51005436	-
circRNA10515	2.60689	3.3296	2.13135	2.97473	2.87689	1.45869	2.36911	2.65073	2.39766	1.76052	2.12734	2.78389	down	-0.388052	0.0596914	0.161798	no	chr12	51073823	51074082	-
circRNA10516	19.9849	16.7218	19.9692	18.0888	13.8978	11.1637	7.90255	10.8123	11.4287	10.0572	10.2729	17.7325	down	-0.787553	0.00106042	0.0400953	no	chr12	51975265	51976575	+
circRNA10517	23.6134	24.7237	24.4149	20.6846	20.2278	41.7318	36.8548	41.9624	32.2147	29.9331	36.5394	22.7329	up	0.684671	0.00291273	0.0476379	no	chr12	53033806	53038411	+
circRNA10518	15.5909	19.8935	19.5492	15.6973	10.6248	13.4997	10.4941	11.8458	11.4548	14.881	12.4351	16.2712	down	-0.387902	0.0868785	0.200833	no	chr12	56282420	56283857	-
circRNA10519	21.7575	29.1828	22.2656	17.9947	19.5677	23.5188	24.4434	20.7985	28.2646	26.2973	24.6645	22.1537	up	0.154892	0.310861	0.463122	no	chr12	56611773	56612246	-
circRNA1052	3.84281	3.18435	3.02281	2.82387	2.63853	3.16242	2.81148	2.02046	2.48033	2.55706	2.60635	3.10247	down	-0.251388	0.114555	0.238146	no	chr7	6111125	6116939	+
circRNA10520	132.116	144.992	195.45	151.609	64.886	78.4154	83.2718	91.6028	92.0189	60.8761	81.237	137.811	down	-0.762477	0.0533156	0.15254	no	chr12	56639106	56640192	-
circRNA10521	0.890399	1.33294	1.84118	1.21638	1.32576	2.7187	2.43517	3.30544	2.6324	2.69426	2.7572	1.32133	up	1.06121	0.000139593	0.0309996	yes	chr12	56741435	56744123	-
circRNA10522	14.9958	17.6085	21.2601	16.6852	17.543	15.6601	19.7943	20.0954	23.4897	19.9933	19.8066	17.6185	up	0.168885	0.212705	0.359545	no	chr12	57298090	57310463	-
circRNA10523	1.83107	2.02242	3.34647	2.42075	1.94715	4.69924	4.54727	3.4288	3.19999	3.69026	3.91311	2.31357	up	0.758194	0.00452908	0.0529583	no	chr12	62384078	62384302	+
circRNA10524	22.7311	26.3432	27.2346	23.2974	26.2392	24.3211	27.7199	26.4176	30.7399	33.1567	28.471	25.1691	up	0.177841	0.11455	0.238146	no	chr12	62498919	62524639	+
circRNA10525	18.5207	21.6212	22.7691	20.1778	22.6009	20.6789	24.3375	22.4592	24.4848	28.3869	24.0695	21.1379	up	0.18737	0.0957199	0.212725	no	chr12	62498919	62526102	+
circRNA10526	22.4282	22.2075	15.5904	22.1124	14.507	6.48669	14.1537	12.46	10.9012	12.4845	11.2972	19.3691	down	-0.777788	0.00735773	0.0616358	no	chr12	63580662	63647365	-
circRNA10527	10.0812	10.559	7.27646	9.3925	7.0096	2.75306	5.19268	6.68806	5.60434	6.29178	5.30598	8.86374	down	-0.740296	0.00755181	0.0620967	no	chr12	63597809	63661481	-
circRNA10528	12.2246	12.0565	8.64236	11.0788	8.56794	3.26463	6.00826	7.79361	6.77768	7.26026	6.22089	10.514	down	-0.757123	0.00525721	0.0551342	no	chr12	63597809	63663845	-
circRNA10529	2.86981	3.83457	3.61069	2.86912	3.55536	5.19409	3.82933	4.44493	4.30416	4.63613	4.48173	3.34791	up	0.420794	0.00546788	0.0555053	no	chr12	64409962	64416754	+
circRNA1053	12.6118	11.9003	13.0309	15.0398	15.6924	12.7708	14.9045	9.36468	10.3079	14.3077	12.3311	13.655	down	-0.147131	0.345345	0.495424	no	chr7	6115323	6147892	+
circRNA10530	8.5693	5.73865	7.02471	5.07223	4.55668	1.2211	0.424131	0.985781	2.32404	4.0085	1.79271	6.19231	down	-1.78834	0.00190386	0.0436789	yes	chr12	66420720	66455564	-
circRNA10531	18.4309	13.5854	20.0299	26.3017	19.0207	40.3828	42.4948	76.4491	45.0331	62.356	53.3432	19.4737	up	1.45378	0.00648735	0.0592869	yes	chr12	68813554	68824651	+
circRNA10532	5.7457	6.40521	5.25245	5.06062	6.79067	5.45542	6.05847	4.93515	6.37746	5.70993	5.70729	5.85093	down	-0.0358617	0.737816	0.82539	no	chr12	69258590	69262562	+
circRNA10533	10.802	10.2415	13.7909	12.0167	10.9938	6.83727	5.87232	3.41041	6.73751	7.88762	6.14902	11.569	down	-0.911832	0.000627063	0.0368952	no	chr12	69755384	69784815	+
circRNA10534	12.2681	11.7675	15.6445	14.3201	11.7787	8.0504	7.50046	4.0504	8.11705	9.23792	7.39125	13.1558	down	-0.831807	0.00124956	0.041835	no	chr12	69755384	69795344	+
circRNA10535	12.7874	12.9063	17.0371	15.1067	12.4802	8.63302	8.22948	4.53614	8.73332	10.3826	8.10291	14.0635	down	-0.795447	0.00186706	0.0434304	no	chr12	69755384	69800337	+
circRNA10536	12.6135	13.27	17.6525	16.0952	12.0009	8.77679	9.58866	4.82	9.34616	11.0252	8.71137	14.3264	down	-0.717706	0.00580769	0.0567487	no	chr12	69784720	69801721	+
circRNA10537	7.50887	5.93779	6.99732	7.29856	9.29646	9.36655	9.37004	7.63766	9.8601	12.1353	9.67393	7.4078	up	0.385057	0.0386912	0.129923	no	chr12	71619315	71620315	-
circRNA10538	13.0329	7.75878	7.65662	21.2816	4.24667	8.08681	0.568086	0.532959	3.22678	3.12356	3.10764	10.7953	down	-1.79651	0.0601096	0.162446	no	chr12	79217503	79299551	+
circRNA10539	6.10825	5.24974	4.84888	6.54127	4.56341	1.00473	3.22919	0.189321	1.42579	2.5143	1.67267	5.46231	down	-1.70736	0.000646081	0.0370562	yes	chr10	60084602	60085253	-
circRNA1054	16.0663	16.5396	16.3595	15.1131	23.6799	13.2407	15.1792	15.1244	16.802	20.6208	16.1934	17.5517	down	-0.1162	0.514591	0.65074	no	chr7	8003908	8060248	+
circRNA10540	12.8877	14.8259	21.4447	15.5327	13.2596	11.2608	10.814	10.5442	14.2326	18.0273	12.9758	15.5901	down	-0.264812	0.248654	0.397944	no	chr12	81174788	81199444	+
circRNA10541	1.33291	2.02035	1.73468	1.86362	2.02712	0.923923	1.74821	1.3635	2.00291	2.21005	1.64972	1.79574	down	-0.122354	0.598075	0.718393	no	chr12	82386803	82403130	+
circRNA10542	4.48598	6.86505	6.91354	5.4303	6.53495	3.88702	6.51555	4.7849	7.16208	7.84316	6.03854	6.04597	down	-0.00177277	0.993497	0.996224	no	chr12	82386803	82438791	+
circRNA10543	7.84918	10.879	11.0933	9.02388	10.3885	6.74232	10.7165	7.90509	11.9358	13.9378	10.2475	9.84678	up	0.0575503	0.792027	0.864256	no	chr12	82386803	82456820	+
circRNA10544	89.0738	55.1129	67.1484	54.0344	56.0421	42.0451	73.0061	44.8319	92.8169	71.6925	64.8785	64.2823	up	0.0133186	0.960455	0.974689	no	chr12	82966919	83030879	+
circRNA10545	0.298832	0.267465	0.475584	0.262705	0.388834	0.1371	0.201599	0.389316	0.409609	0.400146	0.307554	0.338684	down	-0.139099	0.672062	0.776963	no	chr12	85055547	85066898	+
circRNA10546	4.84859	5.86283	3.64538	5.38539	6.50453	6.35181	8.78312	5.09244	8.25829	9.49782	7.59669	5.24934	up	0.533235	0.0449693	0.140276	no	chr12	89459638	89497342	-
circRNA10547	5.65736	6.53501	6.58943	4.08358	6.52898	6.02925	6.03168	6.60234	5.11769	7.74571	6.30533	5.87887	up	0.101033	0.528112	0.661813	no	chr12	92827912	92853025	-
circRNA10548	4.98113	4.35304	2.06935	3.68285	5.19565	4.16924	7.77806	5.43138	5.60855	5.63082	5.72361	4.05641	up	0.496724	0.0731524	0.182203	no	chr12	94578394	94582538	-
circRNA10549	19.2048	20.5627	21.1225	17.772	27.2914	21.2035	23.5141	23.1147	27.6209	28.4675	24.7841	21.1907	up	0.225987	0.13345	0.263808	no	chr12	95251940	95266632	+
circRNA1055	9.08893	9.27138	6.41693	11.2592	6.17101	2.44526	4.60869	3.11094	12.2714	3.93929	5.2751	8.44148	down	-0.678297	0.168327	0.307391	no	chr7	8218305	8236005	-
circRNA10550	2.84949	2.58525	2.89961	2.78303	5.27406	5.84656	5.16934	5.90778	5.59497	6.6597	5.83567	3.27829	up	0.831955	0.0041129	0.0515616	no	chr12	98649487	98667644	+
circRNA10551	2.12398	1.88075	1.31522	2.63077	2.14525	3.63848	2.68552	4.02376	2.23894	3.41871	3.20108	2.01919	up	0.664781	0.0190935	0.0919537	no	chr12	100047530	100051221	-
circRNA10552	5.40493	6.21369	5.13714	8.64949	7.09864	5.44285	5.86278	4.24496	1.84845	6.81554	4.84292	6.50078	down	-0.424737	0.161611	0.299652	no	chr12	101714090	101716812	+
circRNA10553	2.75067	3.00868	3.65099	3.68744	2.97535	4.52717	3.31334	3.43614	3.02796	4.35133	3.73119	3.21462	up	0.214985	0.188786	0.331544	no	chr12	101757212	101771157	-
circRNA10554	4.34656	4.48447	4.87931	5.35372	4.79777	6.6215	4.96397	4.71038	4.61091	7.12258	5.60587	4.77237	up	0.232234	0.19458	0.33864	no	chr12	101780152	101790057	-
circRNA10555	16.5992	21.0189	22.8171	15.048	9.48686	6.90024	5.57367	9.76452	11.1592	7.80062	8.23965	16.994	down	-1.04437	0.0165165	0.0861757	yes	chr12	109167896	109171914	+
circRNA10556	17.6055	20.9487	24.6264	15.2882	9.30042	6.40764	4.70049	7.71481	8.98732	5.69704	6.70146	17.5538	down	-1.38924	0.0116935	0.073595	yes	chr12	109209165	109216920	+
circRNA10557	13.1079	14.9817	20.5343	10.4195	8.85636	5.17313	4.44372	6.42997	7.82358	6.04412	5.98291	13.5799	down	-1.18256	0.0178457	0.0890789	yes	chr12	109222507	109247703	+
circRNA10558	8.38644	11.6346	13.6195	7.86004	5.76794	3.87992	3.20118	4.41762	6.0072	3.64211	4.2296	9.45371	down	-1.16036	0.0172595	0.0880309	yes	chr12	109249984	109256236	+
circRNA10559	8.91036	5.70068	6.79239	11.3266	2.90346	3.60453	2.87104	6.50304	2.6596	4.74185	4.07601	7.1267	down	-0.806076	0.105375	0.226172	no	chr12	109798614	109800758	-
circRNA1056	1.65265	2.68841	2.8753	2.31414	5.39078	6.44306	3.62611	8.81007	4.98856	6.31295	6.03615	2.98425	up	1.01626	0.0234385	0.101932	yes	chr7	13909632	13931749	-
circRNA10560	0.621215	0.724346	0.895929	0.651952	0.816019	0.531413	0.974763	1.07324	1.15684	0.924811	0.932214	0.741892	up	0.329452	0.164515	0.303357	no	chr12	110128950	110135437	+
circRNA10561	6.39176	7.83889	7.80226	10.295	7.00866	10.6188	11.175	9.45877	11.4296	12.9169	11.1198	7.86731	up	0.49919	0.00600905	0.0574449	no	chr12	110326390	110328017	+
circRNA10562	5.00611	6.70233	5.86427	7.27853	5.35078	5.23098	6.75723	4.21297	5.9506	5.31453	5.49326	6.0404	down	-0.136982	0.385124	0.533733	no	chr12	111552280	111552977	-
circRNA10563	4.83407	4.64267	4.76767	3.77791	4.32568	4.77103	4.42996	3.8452	4.90523	5.74383	4.73905	4.4696	up	0.0844539	0.48691	0.626272	no	chr12	111660600	111681835	-
circRNA10564	2.09843	2.65158	3.04082	1.67496	2.26968	2.35651	2.31142	2.06416	2.52791	2.83733	2.41946	2.34709	up	0.0438118	0.794872	0.866134	no	chr12	111672661	111679340	-
circRNA10565	56.5097	39.1461	35.7648	69.1537	33.664	42.6071	31.4902	27.2632	23.9407	48.0322	34.6667	46.8477	down	-0.434427	0.184514	0.326832	no	chr12	111781918	111783298	+
circRNA10566	3.78642	4.37165	5.62323	4.01121	6.66581	5.11782	6.07275	5.83085	5.59331	8.80837	6.28462	4.89167	up	0.3615	0.140554	0.272679	no	chr12	112068880	112093136	-
circRNA10567	5.94102	6.28716	6.67363	6.10973	6.06591	4.02195	4.81752	3.87328	4.60484	6.3173	4.72698	6.21549	down	-0.39495	0.0240206	0.103307	no	chr12	112207874	112219489	-
circRNA10568	2.48187	3.40463	2.76113	3.18598	3.04046	1.92122	2.43499	1.61688	2.58876	3.18708	2.34978	2.97482	down	-0.340272	0.0923361	0.208327	no	chr12	112239052	112240027	-
circRNA10569	7.52189	8.19228	7.80387	7.16433	8.39309	4.90139	6.82814	5.49382	6.87169	8.38814	6.49664	7.81509	down	-0.26657	0.0964675	0.213597	no	chr12	112239052	112252528	-
circRNA1057	4.1274	4.38996	5.40565	4.63297	5.50835	2.95006	4.26265	12.4075	6.88292	7.26782	6.75418	4.81287	up	0.488885	0.301265	0.453563	no	chr7	16258390	16278226	-
circRNA10570	7.57639	10.3657	10.7097	10.6291	11.7897	12.6466	11.01	13.3086	13.8551	12.84	12.732	10.2141	up	0.3179	0.0208866	0.0962292	no	chr12	112446276	112456063	+
circRNA10571	9.38308	13.0242	10.3712	8.6202	11.0203	1.55082	4.89483	0.495731	10.2251	1.02602	3.63851	10.4838	down	-1.52674	0.0158735	0.0844803	yes	chr12	114679505	114681146	-
circRNA10572	2.00929	1.70195	0.953437	2.04692	2.4233	0	0.0450979	0	0.0236213	0	0.0137438	1.82698	down	-7.05453	0.00180667	0.0434304	yes	chr12	117218046	117222863	-
circRNA10573	5.10515	4.81946	6.88964	4.45741	5.37626	6.16623	3.85058	5.46175	4.54037	7.0448	5.41275	5.32958	up	0.0223375	0.909263	0.941694	no	chr12	120510017	120522363	-
circRNA10574	12.6964	16.0572	15.7725	12.3493	11.2832	8.48375	7.65891	7.93823	9.0191	8.96354	8.41271	13.6317	down	-0.696327	0.004248	0.0520255	no	chr12	120539368	120552698	+
circRNA10575	9.03661	9.27218	8.87344	7.28173	6.80812	5.82243	4.90806	5.73475	6.13214	5.96108	5.71169	8.25442	down	-0.531248	0.00462723	0.0532553	no	chr12	120546405	120566980	+
circRNA10576	6.84758	6.23599	6.56047	5.51705	5.37762	4.50093	3.73262	4.49797	4.6568	4.61527	4.40072	6.10774	down	-0.4729	0.00172971	0.0431772	no	chr12	120554718	120563943	+
circRNA10577	4.27365	4.04287	4.41983	3.53404	3.10623	3.47852	2.77239	3.10393	3.1944	3.05043	3.11993	3.87532	down	-0.312801	0.032955	0.120597	no	chr12	120557282	120560886	+
circRNA10578	9.88592	17.4463	14.7642	10.8621	9.59828	9.59741	15.8251	14.0521	21.2658	13.4089	14.8299	12.5114	up	0.245267	0.372632	0.521912	no	chr12	120716628	120717042	+
circRNA10579	11.6932	13.7443	12.7143	14.2289	13.7712	13.2968	17.5055	15.7885	15.8655	17.2465	15.9405	13.2304	up	0.268848	0.0187508	0.0911713	no	chr12	121330583	121331428	-
circRNA1058	10.5487	16.9172	18.2563	8.80817	11.8494	9.82379	13.4723	17.9135	12.0917	18.7956	14.4194	13.2759	up	0.119195	0.661237	0.768186	no	chr7	16624983	16636455	-
circRNA10580	1.40857	1.91862	3.34508	1.7333	1.95902	1.95264	2.5312	1.36764	2.14575	3.61723	2.32289	2.07292	up	0.164257	0.631144	0.743278	no	chr12	121957074	121968169	+
circRNA10581	10.3975	10.6417	14.6411	13.6808	12.3199	15.4137	14.4934	12.6362	14.5554	19.5993	15.3396	12.3362	up	0.314366	0.0714797	0.179692	no	chr12	122216488	122218397	-
circRNA10582	7.38375	7.28756	6.75991	10.0506	7.60302	7.77387	7.17079	5.10617	4.47475	11.224	7.14992	7.81697	down	-0.128683	0.632471	0.744474	no	chr12	122340753	122352786	-
circRNA10583	14.8763	19.8577	16.8053	16.7969	13.65	16.1851	15.1045	13.3392	22.6495	15.4867	16.553	16.3972	up	0.0136432	0.937322	0.959772	no	chr12	122508218	122511188	-
circRNA10584	0.516835	0.215807	0.339169	0.0605187	0.207775	0.255393	0.116002	0.228587	0.212658	0.236555	0.209839	0.268021	down	-0.353064	0.501409	0.639204	no	chr12	122777491	122781330	+
circRNA10585	2.64871	2.87285	3.3395	3.21487	3.47619	3.06804	3.27793	3.24838	3.69872	4.42838	3.54429	3.11042	up	0.188386	0.177288	0.318374	no	chr12	123321535	123348133	-
circRNA10586	2.76519	3.1401	3.76623	3.17322	3.01314	3.54099	3.41981	3.26266	4.18465	4.76101	3.83383	3.17158	up	0.273585	0.0841254	0.197351	no	chr12	123334053	123348133	-
circRNA10587	17.6898	20.0761	14.2328	16.6048	15.6455	18.5335	23.3983	15.0259	18.626	19.5703	19.0308	16.8498	up	0.175604	0.22906	0.377506	no	chr12	124362126	124363799	-
circRNA10588	30.6988	32.4467	30.6945	26.1709	31.1071	23.2749	25.5097	29.3414	31.8996	25.4685	27.0988	30.2236	down	-0.157445	0.139409	0.271178	no	chr12	124419957	124495368	-
circRNA10589	12.9309	14.268	11.3291	11.1655	14.9302	9.28644	9.95253	11.5314	11.8622	10.0781	10.5421	12.9247	down	-0.293969	0.0341259	0.122226	no	chr12	124466173	124495368	-
circRNA1059	6.76743	10.4123	8.74786	6.37119	17.1813	14.1844	21.7995	15.8672	11.8442	18.5571	16.4505	9.89602	up	0.733213	0.0369311	0.127092	no	chr7	18762157	18874596	+
circRNA10590	5.60284	6.8679	6.6807	5.48852	8.64203	16.1194	20.0561	35.9545	12.3008	23.9573	21.6776	6.6564	up	1.70339	0.020192	0.0947272	yes	chr12	128800854	128815070	-
circRNA10591	6.32381	1.35799	2.07143	4.00521	3.00921	0.0173606	0.0473119	0.108769	3.20501	0.11256	0.698202	3.35353	down	-2.26396	0.0406488	0.13328	yes	chr12	130399679	130414306	-
circRNA10592	22.2324	18.5519	19.1557	18.1658	21.924	20.769	22.2813	20.682	23.2832	22.4084	21.8848	20.006	up	0.129497	0.105494	0.226245	no	chr12	131992173	132006877	+
circRNA10593	5.21902	5.78526	4.15665	5.35967	6.48186	5.34991	6.53552	5.53315	4.32066	6.69853	5.68755	5.40049	up	0.0747178	0.632122	0.744262	no	chr12	132780798	132784307	-
circRNA10594	7.2093	6.8008	5.10886	5.28791	10.3538	8.9242	6.90497	5.5265	4.73599	9.68257	7.15485	6.95213	up	0.0414657	0.8835	0.924624	no	chr12	132853431	132861634	-
circRNA10595	12.0662	12.6184	9.22721	9.82835	11.1647	7.55976	7.09311	6.66646	6.20064	7.09579	6.92315	10.981	down	-0.665505	0.0019405	0.0438843	no	chr11	992503	994245	+
circRNA10596	29.1674	31.6418	27.5363	30.1503	23.0657	24.8311	19.6379	20.6109	15.5552	20.4915	20.2253	28.3123	down	-0.485266	0.00467901	0.0534592	no	chr11	1286002	1295794	-
circRNA10597	16.4049	13.4869	16.9562	16.5783	11.1531	4.21399	7.60717	8.26128	5.09239	12.7074	7.57646	14.9159	down	-0.977253	0.00499088	0.0546139	no	chr11	3500466	3508396	-
circRNA10598	2.50056	3.0937	3.82895	2.71385	3.10515	3.49529	3.03383	3.17493	3.94406	3.1156	3.35274	3.04844	up	0.137269	0.314015	0.465921	no	chr11	3691347	3693375	-
circRNA10599	3.28342	4.37418	1.76798	0.833022	0.188569	0.743645	0.184238	2.96491	0	0.375705	0.853699	2.08943	down	-1.29131	0.230834	0.378959	no	chr11	8226975	8230504	-
circRNA106	7.79474	8.62506	10.404	8.73972	9.54182	12.3044	11.7653	10.844	14.9818	10.7886	12.1368	9.02107	up	0.428019	0.0112536	0.0724936	no	chr13	95757644	95763953	+
circRNA1060	17.1241	11.625	22.8932	17.7159	34.0646	11.3006	4.69162	19.1376	32.2912	16.9566	16.8755	20.6846	down	-0.293622	0.541061	0.672611	no	chr7	20367012	20380831	+
circRNA10600	7.51915	6.8902	9.4863	8.64467	7.47673	8.84186	9.86381	10.0415	10.7551	9.07801	9.71605	8.00341	up	0.279755	0.0202064	0.0947272	no	chr11	9408486	9417148	+
circRNA10601	6.28584	7.47204	8.34143	5.48349	11.7726	13.463	11.7799	14.4452	12.4916	14.3226	13.3004	7.87107	up	0.756841	0.0046533	0.0534293	no	chr11	9713466	9749183	+
circRNA10602	8.89425	8.49222	8.48525	7.61221	8.97458	7.92535	10.3595	12.3879	9.9523	6.734	9.47181	8.4917	up	0.157586	0.383143	0.531696	no	chr11	9961957	9989595	-
circRNA10603	12.808	12.3675	11.8979	14.128	17.4846	11.2673	13.0471	11.0291	13.9518	14.7662	12.8123	13.7372	down	-0.100557	0.481145	0.620907	no	chr11	11880177	11897693	+
circRNA10604	5.88524	5.42189	5.97639	5.52531	8.4419	7.04192	7.30862	7.44719	9.93738	9.19037	8.1851	6.25015	up	0.38911	0.0427437	0.13679	no	chr11	13403168	13421838	-
circRNA10605	7.08632	7.28622	8.91796	7.1579	5.8955	1.79069	3.80806	0.354704	4.69663	3.84028	2.89807	7.26878	down	-1.32662	0.00259334	0.0465657	yes	chr11	16046514	16055901	-
circRNA10606	60.0129	70.2225	77.9325	69.5426	68.8009	16.1346	28.5808	4.95424	69.4817	43.4591	32.5221	69.3023	down	-1.09148	0.0286253	0.112427	yes	chr11	16283756	16476388	-
circRNA10607	3.25146	3.53435	4.52755	3.49541	4.28469	2.37994	3.18332	3.57509	4.85125	3.19525	3.43697	3.81869	down	-0.151942	0.448157	0.5914	no	chr11	17097057	17099969	-
circRNA10608	8.32553	9.13331	9.07752	8.04658	8.94857	6.65785	9.233	9.00319	10.089	8.02774	8.60217	8.7063	down	-0.01736	0.874295	0.919284	no	chr11	17101278	17145942	-
circRNA10609	4.6933	4.84083	5.15167	5.34791	4.86265	3.77047	4.94102	5.55536	5.81627	3.83007	4.78264	4.97927	down	-0.0581289	0.676311	0.780359	no	chr11	17118645	17122813	-
circRNA1061	5.14516	4.94484	4.02486	8.31951	10.2763	6.28396	8.53742	7.08137	8.32755	9.31031	7.90812	6.54213	up	0.273575	0.336543	0.487665	no	chr7	22960256	22991139	-
circRNA10610	66.0516	83.1593	72.4339	65.0795	72.7091	73.9669	77.3737	85.9115	76.4012	71.5841	77.0475	71.8867	up	0.100023	0.240173	0.389349	no	chr11	17878208	17959636	-
circRNA10611	13.9498	14.8813	15.7139	18.3702	18.5924	20.4043	21.5418	27.7903	20.9297	20.8202	22.2973	16.3015	up	0.451858	0.00883967	0.0652863	no	chr11	18347588	18352446	+
circRNA10612	1.91725	2.22277	2.28907	2.08938	3.22319	2.04105	1.58029	1.65257	1.94828	2.00684	1.84581	2.34833	down	-0.347385	0.093681	0.210194	no	chr11	20395803	20397721	+
circRNA10613	13.6592	14.8175	15.991	15.3083	21.1479	15.5253	17.9839	15.8606	17.9012	16.1652	16.6872	16.1848	up	0.0441082	0.733447	0.822336	no	chr11	20402919	20426865	+
circRNA10614	42.6164	38.0394	44.7535	38.9343	32.71	12.8702	17.7667	12.0125	40.4654	24.3404	21.491	39.4107	down	-0.874854	0.0228643	0.10064	no	chr11	27371615	27392518	-
circRNA10615	36.8528	45.939	42.579	23.0463	21.1224	0.872634	4.8735	2.05793	5.18717	3.45442	3.28913	33.9079	down	-3.36584	0.00332001	0.0489011	yes	chr11	30504736	30580494	-
circRNA10616	26.9295	35.9886	30.9465	17.6518	17.2432	0.626632	3.29492	1.5712	3.74283	2.70858	2.38883	25.7519	down	-3.4303	0.00281751	0.0472308	yes	chr11	30535994	30580494	-
circRNA10617	2.57989	3.27075	3.57973	2.71045	3.00258	3.46449	3.64379	3.96502	4.32611	3.67644	3.81517	3.02868	up	0.333059	0.0110328	0.0720526	no	chr11	32927157	32973549	+
circRNA10618	5.96886	6.78576	7.15139	7.89292	9.67327	9.35546	6.92347	10.7556	9.74708	8.40393	9.03711	7.49444	up	0.270041	0.125713	0.253742	no	chr11	34115823	34118503	+
circRNA10619	4.88921	7.36437	6.03064	6.45767	5.39657	4.33093	5.52252	5.01658	6.55432	5.20329	5.32553	6.02769	down	-0.178681	0.247632	0.396989	no	chr11	34947506	34978182	+
circRNA1062	4.7849	4.3434	4.99889	7.23216	9.19984	7.22791	6.07182	5.93884	7.10381	6.65976	6.60043	6.11184	up	0.110954	0.632716	0.74454	no	chr7	22983944	22991139	-
circRNA10620	2.29035	3.04521	3.87622	1.33388	5.1853	3.75272	13.6361	6.34912	3.07517	4.58627	6.27988	3.14619	up	0.997131	0.183963	0.326082	no	chr11	35468001	35474744	-
circRNA10621	24.0917	27.4264	28.0138	25.3849	26.3494	25.4029	28.4797	29.2128	34.1443	27.1472	28.8774	26.2533	up	0.137443	0.160212	0.298036	no	chr11	43396709	43451265	+
circRNA10622	10.0821	11.0269	9.40137	6.19795	9.02748	7.926	9.86264	13.4344	7.35398	8.0755	9.33051	9.14716	up	0.0286315	0.897443	0.934069	no	chr11	45936494	45938312	-
circRNA10623	4.05892	4.83534	3.915	4.0137	5.09762	4.47071	3.73309	3.91583	3.34379	4.35325	3.96333	4.38412	down	-0.145571	0.223441	0.371509	no	chr11	46541945	46548500	-
circRNA10624	0.893448	2.17621	1.1576	0.915409	1.49658	0.321924	2.33953	2.24745	3.6762	0.954172	1.90785	1.32785	up	0.522859	0.398691	0.547109	no	chr11	46894589	46895291	-
circRNA10625	12.9538	15.0297	13.897	12.0997	17.2515	14.5378	16.7133	15.67	14.5858	15.5823	15.4178	14.2463	up	0.11401	0.281304	0.432551	no	chr11	47472191	47482856	-
circRNA10626	26.2886	20.8927	24.8719	29.024	23.9254	18.8773	16.4616	21.2045	13.455	18.5509	17.7098	25.0005	down	-0.497408	0.00454152	0.0530124	no	chr11	47622701	47631711	-
circRNA10627	0.241121	0.355347	0.561337	0.325522	0.42195	0.269839	0.367689	0.955089	0.210096	0.575609	0.475665	0.381055	up	0.319944	0.542315	0.673728	no	chr11	47690076	47692256	-
circRNA10628	9.26275	9.00065	9.96974	10.0445	8.00263	10.9454	9.12948	7.79274	10.337	7.05057	9.05104	9.25606	down	-0.0323147	0.812062	0.878384	no	chr11	57692611	57696873	+
circRNA10629	1.96951	2.06877	2.05828	4.00613	3.92971	3.35807	3.3398	2.61695	2.03858	4.54043	3.17876	2.80648	up	0.179704	0.573362	0.698052	no	chr11	66485173	66488007	+
circRNA1063	2.51385	2.45886	2.80774	2.60275	2.39275	2.8872	3.09072	4.71728	3.791	3.49713	3.59667	2.55519	up	0.49323	0.0298062	0.114536	no	chr7	23123777	23144025	+
circRNA10630	2.56234	2.26402	3.60303	1.42176	2.83444	0.674454	0.638009	1.11959	2.63405	1.48014	1.30925	2.53712	down	-0.954454	0.042927	0.137071	no	chr11	66759043	66762450	+
circRNA10631	8.31236	6.25761	12.594	5.3052	6.54303	1.86625	2.52266	5.31044	7.49135	3.90467	4.21907	7.80244	down	-0.887	0.0624294	0.166305	no	chr11	66800641	66816199	+
circRNA10632	5.48806	4.42001	9.07505	3.74169	5.10196	1.40991	1.66905	3.81771	5.49206	3.13297	3.10434	5.56535	down	-0.842186	0.0740145	0.183472	no	chr11	66803998	66828364	+
circRNA10633	2.26888	2.10193	3.42688	1.59107	3.29744	0.742222	0.621438	1.5205	2.48551	1.70611	1.41516	2.53724	down	-0.842299	0.0522461	0.15089	no	chr11	66821643	66822674	+
circRNA10634	10.1968	11.8507	13.8122	11.3827	15.6772	12.67	15.7794	14.8225	13.0083	14.4408	14.1442	12.5839	up	0.168628	0.211987	0.358798	no	chr11	67217731	67228163	+
circRNA10635	7.66604	6.03857	5.98162	8.58848	5.6299	3.8695	6.04595	2.58672	6.53813	4.00416	4.60889	6.78092	down	-0.557062	0.0498677	0.147318	no	chr11	68347847	68348243	+
circRNA10636	10.3547	12.3992	12.5255	10.9803	12.9644	9.44162	13.266	11.0621	14.0333	11.5338	11.8674	11.8448	up	0.00274457	0.981874	0.988616	no	chr11	68569748	68596218	+
circRNA10637	12.678	16.0801	12.8404	10.7357	11.5714	12.0085	9.54267	10.4233	9.35374	12.2339	10.7124	12.7811	down	-0.254727	0.100243	0.219069	no	chr11	70343669	70348420	+
circRNA10638	8.164	9.33656	7.62863	16.2764	12.0777	22.5784	11.5117	13.3928	11.2284	18.8345	15.5092	10.6966	up	0.535961	0.12148	0.247888	no	chr11	72712196	72714321	-
circRNA10639	53.2206	58.277	62.3357	48.0216	119.077	82.9261	112.674	92.8156	78.5406	109.451	95.2813	68.1864	up	0.482709	0.11329	0.236736	no	chr11	72984088	73083740	-
circRNA1064	2.04855	1.78902	3.26801	2.06831	3.81823	1.95971	2.62293	2.51248	0.852907	5.77496	2.7446	2.59842	up	0.0789581	0.878057	0.921388	no	chr7	24620052	24668660	+
circRNA10640	106.7	116.352	125.303	96.6942	238.058	168.992	226.412	185.578	157.371	218.772	191.425	136.622	up	0.486596	0.108692	0.230796	no	chr11	73000990	73083740	-
circRNA10641	33.6681	30.6732	36.6311	37.5378	33.9886	32.084	39.8805	42.8415	53.5658	37.4299	41.1603	34.4997	up	0.254669	0.138463	0.270076	no	chr11	73707420	73730823	-
circRNA10642	2.4178	3.88343	3.63006	2.25831	3.14593	1.9492	2.21208	2.34226	2.91595	2.59808	2.40351	3.06711	down	-0.351734	0.116168	0.240275	no	chr11	74113780	74123135	-
circRNA10643	45.829	58.7463	62.8601	50.5777	44.829	55.4986	49.7311	48.5784	70.8276	57.735	56.4741	52.5684	up	0.103394	0.485437	0.624647	no	chr11	74122988	74133557	-
circRNA10644	2.21173	3.12705	3.14399	3.04504	2.63888	2.64256	2.25293	2.84782	3.65209	3.11594	2.90227	2.83334	up	0.0346768	0.822059	0.884391	no	chr11	74132844	74139828	-
circRNA10645	35.5498	29.3445	31.0452	36.87	63.1431	47.9871	55.2876	47.9714	37.415	60.2886	49.7899	39.1905	up	0.345349	0.189555	0.332424	no	chr11	75879879	75912039	+
circRNA10646	19.6576	23.9839	23.7575	20.5052	39.0332	31.3887	40.9022	42.1623	27.9781	39.2672	36.3397	25.3875	up	0.517429	0.0424362	0.136284	no	chr11	75983387	76016980	+
circRNA10647	2.07586	2.04261	1.95236	1.55972	1.55718	1.49919	1.61359	1.37884	1.84135	1.74404	1.6154	1.83755	down	-0.185888	0.160986	0.298921	no	chr11	76458183	76464080	+
circRNA10648	3.14308	5.0409	4.79505	3.71227	3.75422	3.20312	4.40742	3.30238	4.43645	4.19588	3.90905	4.0891	down	-0.0649668	0.699522	0.797353	no	chr11	76463821	76472840	+
circRNA10649	9.00699	8.23682	9.68759	7.89116	9.87355	10.0327	11.4193	12.2688	11.4652	12.4776	11.5327	8.93922	up	0.367512	0.00213425	0.0451691	no	chr11	77675036	77693611	-
circRNA1065	1.72986	1.34305	2.18095	1.71777	2.91539	1.32453	2.00244	2.1685	0.719316	5.04153	2.25126	1.97741	up	0.187127	0.743171	0.82888	no	chr7	24623666	24650712	+
circRNA10650	4.03219	4.13185	5.66567	4.7261	5.5047	6.87693	5.79891	5.6389	6.73176	4.95743	6.00079	4.8121	up	0.318484	0.0423312	0.136132	no	chr11	78103980	78109581	-
circRNA10651	3.01952	2.7733	2.7845	3.00576	3.8323	3.90421	4.02354	3.13587	4.23245	3.3052	3.72025	3.08308	up	0.271031	0.0580852	0.159079	no	chr11	78106807	78121174	-
circRNA10652	1.77284	1.46028	1.56274	1.76418	2.14048	2.26601	2.11627	2.11421	2.65438	1.89132	2.20844	1.7401	up	0.343855	0.0263066	0.107787	no	chr11	78112650	78121174	-
circRNA10653	5.28474	5.01834	5.7625	7.85818	7.10347	7.1773	6.76261	5.63131	6.53842	6.46978	6.51588	6.20545	up	0.0704261	0.626279	0.739724	no	chr11	83161327	83164401	+
circRNA10654	2.56078	2.79163	2.88523	3.19109	3.06265	3.10243	3.06859	2.3697	3.447	2.5994	2.91743	2.89827	up	0.00950181	0.933619	0.957581	no	chr11	83163679	83169995	+
circRNA10655	5.80785	5.69113	6.3098	6.83321	6.10812	7.0845	7.43157	6.36047	8.85945	7.39067	7.42533	6.15002	up	0.271864	0.0316225	0.118074	no	chr11	83198479	83240934	+
circRNA10656	1.36186	1.18762	1.56951	1.62453	1.31683	1.66865	1.82245	1.39514	1.97315	1.79087	1.73005	1.41207	up	0.293005	0.0368041	0.126907	no	chr11	83206058	83211430	+
circRNA10657	0.768338	0.97366	0.758787	0.984287	0.771285	0.75796	0.743849	0.721669	1.29767	0.94669	0.893568	0.851271	up	0.0699579	0.738328	0.825492	no	chr11	83224855	83248087	+
circRNA10658	10.9285	9.06321	11.1383	12.1437	10.9178	12.9521	11.5451	12.2317	11.0297	10.0984	11.5714	10.8383	up	0.0944265	0.324779	0.476192	no	chr11	85981129	85982003	-
circRNA10659	11.692	10.307	12.425	12.2981	12.2709	13.5328	12.7165	12.8795	11.9389	10.4565	12.3048	11.7986	up	0.0606056	0.46553	0.606643	no	chr11	85981745	85982003	-
circRNA1066	2.14441	1.78412	3.26607	2.11471	3.79003	1.90908	2.50499	2.57018	0.857934	5.8546	2.73936	2.61987	up	0.064342	0.901348	0.936415	no	chr7	24623666	24668660	+
circRNA10660	19.7916	18.5275	21.7927	24.6333	24.3015	22.0688	23.4272	22.4729	18.2793	25.7301	22.3957	21.8093	up	0.0382728	0.740072	0.826478	no	chr11	85983866	86031611	-
circRNA10661	5.77053	8.65853	6.27046	6.46392	3.27557	4.37429	3.02674	5.29803	2.45623	3.57349	3.74576	6.0878	down	-0.700665	0.0539749	0.153435	no	chr11	86446314	86448255	-
circRNA10662	57.6679	57.0835	61.6006	54.9022	32.6281	38.3919	34.6581	48.2409	28.7328	31.3747	36.2797	52.7764	down	-0.540733	0.0321825	0.119309	no	chr11	86487337	86508867	-
circRNA10663	1.44326	1.54009	2.06831	1.47874	2.35309	3.36287	4.43273	5.02685	2.90325	3.90316	3.92577	1.7767	up	1.14378	0.00237841	0.0454716	yes	chr11	87067694	87071615	+
circRNA10664	18.7429	9.50429	7.94625	48.3268	12.4761	6.15612	22.278	17.8329	9.493	10.709	13.2938	19.3993	down	-0.545247	0.47968	0.619499	no	chr11	89421902	89444232	-
circRNA10665	12.4221	5.89664	5.84343	26.1654	8.20994	3.24063	10.9864	8.95782	5.08146	4.91415	6.63609	11.7075	down	-0.819028	0.266684	0.4171	no	chr11	89444135	89451895	-
circRNA10666	0.955896	0.864088	1.5097	1.26373	2.79329	3.01317	2.57976	2.24477	2.57417	2.81561	2.64549	1.47734	up	0.840532	0.0249886	0.105316	no	chr11	94568730	94597915	+
circRNA10667	13.8508	16.3986	12.4905	13.7431	13.9995	15.7115	22.1952	22.6236	23.7238	14.999	19.8506	14.0965	up	0.493849	0.0330824	0.120732	no	chr11	95985531	95991723	-
circRNA10668	30.3069	34.2169	37.7554	30.8912	37.6812	18.3439	28.6968	27.879	41.9975	18.2646	27.0363	34.1703	down	-0.337843	0.184214	0.326439	no	chr11	102186018	102209564	+
circRNA10669	4.73846	5.30687	5.55507	4.84043	5.78258	3.37649	5.17832	7.68029	5.97137	4.90736	5.42277	5.24468	up	0.0481742	0.818173	0.881695	no	chr11	103143268	103223086	+
circRNA1067	78.0494	88.8166	83.7825	59.4816	60.3885	46.2218	54.2171	98.2258	50.7169	82.0675	66.2898	74.1037	down	-0.160759	0.53076	0.664008	no	chr7	27629371	27649633	-
circRNA10670	12.0726	11.1469	10.8123	9.72297	11.1217	11.3415	15.3616	17.342	15.538	8.03184	13.523	10.9753	up	0.30115	0.208309	0.354474	no	chr11	103280348	103323990	+
circRNA10671	1.09804	1.30756	1.49336	1.12764	0.866406	0.569156	1.29415	2.13178	1.66688	1.13013	1.35842	1.1786	up	0.204852	0.55092	0.680923	no	chr11	103311878	103323990	+
circRNA10672	3.86357	2.20902	2.79279	3.71573	4.55008	3.02221	1.57841	2.86216	3.79288	4.90517	3.23216	3.42624	down	-0.0841244	0.785389	0.859626	no	chr11	107803001	107815965	-
circRNA10673	19.2795	21.0336	23.9337	20.2244	25.689	19.1475	24.2116	24.2168	23.6844	25.3349	23.319	22.0321	up	0.0819038	0.448222	0.5914	no	chr11	108049890	108089623	+
circRNA10674	1.10076	1.20029	1.37505	1.33646	1.43088	1.76713	1.70255	1.4157	1.62473	1.49983	1.60199	1.28869	up	0.313963	0.00760341	0.0622505	no	chr11	108172199	108173851	-
circRNA10675	2.44384	3.08133	3.41281	2.76419	3.4793	2.61313	3.61647	3.62106	4.47753	3.23814	3.51327	3.03629	up	0.210501	0.228641	0.377174	no	chr11	111844601	111857737	-
circRNA10676	2.55827	2.64594	3.16009	3.20431	1.55597	1.78439	1.90283	2.31595	2.25403	1.13609	1.87866	2.62491	down	-0.482567	0.0788753	0.190023	no	chr11	112037273	112039397	+
circRNA10677	3.86637	4.61949	4.73392	4.50162	4.1184	3.18273	3.89175	3.77322	4.0508	3.68614	3.71693	4.36796	down	-0.23285	0.018054	0.0896668	no	chr11	112045863	112051349	+
circRNA10678	3.2313	3.70608	2.74208	3.52646	3.12815	2.77177	2.98752	2.31142	3.67644	3.22341	2.99411	3.26682	down	-0.125757	0.364228	0.513316	no	chr11	113741694	113757853	-
circRNA10679	6.55325	5.7148	6.97058	5.59029	7.5916	6.22251	6.95814	7.60019	5.86654	6.61552	6.65258	6.4841	up	0.0370069	0.736379	0.824475	no	chr11	113812276	113829345	-
circRNA1068	1.18441	0.751472	1.18492	1.22298	3.72264	3.01949	2.07836	0.928635	0.316455	2.59964	1.78852	1.61329	up	0.148763	0.818153	0.881695	no	chr7	28488175	28507737	+
circRNA10680	5.67041	4.48879	6.63728	4.16369	6.26888	5.31218	5.98569	7.22335	4.66632	4.16337	5.47018	5.44581	up	0.00644184	0.973907	0.983687	no	chr11	113833420	113834335	-
circRNA10681	6.50463	9.45514	7.8968	7.08325	8.60366	6.01613	9.16168	8.95312	9.35523	7.16686	8.13061	7.90869	up	0.0399232	0.799012	0.869216	no	chr11	117238601	117246948	+
circRNA10682	13.9229	12.5721	17.714	17.1653	12.9522	16.0201	18.269	11.5778	11.0472	14.6541	14.3136	14.8653	down	-0.054559	0.758744	0.840047	no	chr11	119020150	119021886	+
circRNA10683	3.86619	2.67674	3.93777	3.23888	3.19996	3.36791	2.36718	2.81639	2.90085	2.77794	2.84605	3.38391	down	-0.249727	0.098984	0.217068	no	chr11	119179693	119182345	+
circRNA10684	5.11439	4.25076	4.70118	3.46627	7.50981	7.3573	11.2255	10.2547	6.21422	10.3086	9.07207	5.00848	up	0.857058	0.0104538	0.0706418	no	chr11	119275997	119297481	+
circRNA10685	9.53312	10.1181	8.26999	9.5043	8.7446	7.12923	10.9004	13.3226	10.3538	8.02613	9.94643	9.23403	up	0.107219	0.56271	0.689419	no	chr11	120440129	120451724	+
circRNA10686	12.5316	11.2437	10.9721	10.6029	10.6871	8.73965	14.3779	15.1807	13.3146	10.6303	12.4486	11.2075	up	0.151525	0.370733	0.520055	no	chr11	120457118	120473127	+
circRNA10687	7.84042	9.05403	13.2437	10.2978	8.48063	15.0439	16.0745	12.0825	16.2256	10.5887	14.003	9.78332	up	0.517343	0.0221744	0.099284	no	chr11	125618373	125618561	+
circRNA10688	10.3229	21.2696	22.721	9.78857	5.96973	3.60415	3.7041	5.30648	4.83749	2.00077	3.8906	14.0143	down	-1.84884	0.0380188	0.128833	yes	chr11	126406096	126413648	+
circRNA10689	42.2096	46.7046	52.1899	38.9608	29.4342	45.8303	30.0418	39.026	39.756	35.7844	38.0877	41.8998	down	-0.13762	0.436359	0.580585	no	chr11	130126700	130135715	+
circRNA1069	23.8517	38.7287	26.2855	33.3624	29.7409	30.1168	37.0902	38.7271	36.9382	39.6456	36.5036	30.3938	up	0.26426	0.0922417	0.208205	no	chr7	30550636	30562128	-
circRNA10690	17.3712	24.0762	24.0608	14.8104	16.4911	12.9708	1.4249	7.39758	28.6133	2.84984	10.6513	19.362	down	-0.862198	0.158483	0.296062	no	chr11	130190454	130194288	+
circRNA10691	5.44564	5.78574	4.60883	5.88072	4.58261	3.22131	4.41961	6.46198	3.24279	4.34576	4.33829	5.26071	down	-0.27813	0.210117	0.356544	no	chr10	413913	423033	-
circRNA10692	9.56825	10.2526	9.51421	10.2293	10.575	11.1792	10.772	11.1783	10.774	11.8257	11.1458	10.0279	up	0.152488	0.00432957	0.0522147	no	chr10	1084403	1105267	+
circRNA10693	5.58806	6.25547	7.97452	7.26225	6.76902	29.8619	27.3624	27.4655	58.8826	53.0203	39.3186	6.76986	up	2.53801	0.00894176	0.0656212	yes	chr10	3118782	3120044	+
circRNA10694	0.854359	1.21557	0.991417	1.20173	1.2687	1.27697	1.27188	0.546976	0.92007	1.34752	1.07268	1.10636	down	-0.0445926	0.849842	0.903274	no	chr10	4830675	4835809	+
circRNA10695	7.18843	7.57517	7.34478	6.40037	11.5376	25.7259	24.7258	22.1955	9.58236	30.8942	22.6248	8.00928	up	1.49816	0.0128557	0.0766046	yes	chr10	7227855	7285954	-
circRNA10696	71.9304	75.8887	52.0707	81.4851	326.545	513.964	300.716	273.263	139.026	562.67	357.928	121.584	up	1.55772	0.0410879	0.133957	yes	chr10	11165486	11257872	+
circRNA10697	4.28362	4.9952	5.71774	4.44239	5.31977	5.4216	6.45521	6.77611	6.15974	6.39565	6.24167	4.95174	up	0.333995	0.00654814	0.0595337	no	chr10	11936545	11952249	-
circRNA10698	0.912696	0.974322	0.901521	1.33515	0.768495	1.01276	0.86912	0.653625	0.442554	0.729578	0.741527	0.978437	down	-0.399978	0.119159	0.244423	no	chr10	12081472	12097996	+
circRNA10699	2.26423	1.64425	1.96296	2.09798	0.672796	5.78892	3.17071	4.87652	1.21519	3.31177	3.67262	1.72844	up	1.08734	0.0671814	0.173447	no	chr10	14825479	14828272	-
circRNA107	21.0996	23.8564	28.7258	20.5795	17.9011	11.6112	13.992	8.43062	16.8748	14.6506	13.1118	22.4325	down	-0.774721	0.00444766	0.0526234	no	chr13	98213220	98213413	+
circRNA1070	7.22673	4.87642	7.61744	7.97704	6.14211	4.3437	7.15192	7.69456	4.82247	6.78932	6.16039	6.76795	down	-0.135696	0.505919	0.643336	no	chr7	30621393	30622462	+
circRNA10700	44.9482	42.7217	49.245	47.8468	60.9694	51.9389	69.8352	64.1559	42.3694	63.9051	58.4409	49.1462	up	0.249898	0.159736	0.297415	no	chr10	16695023	16782084	-
circRNA10701	15.1155	13.1857	15.3269	12.0481	17.853	17.5054	21.1106	21.7224	12.4799	18.2467	18.213	14.7058	up	0.308579	0.113526	0.237073	no	chr10	16752539	16782084	-
circRNA10702	8.07952	5.08461	5.59302	16.2033	4.06377	2.76046	8.19507	12.0239	0.454344	6.26468	5.9397	7.80485	down	-0.393982	0.550786	0.680839	no	chr10	16869636	16904115	-
circRNA10703	9.15553	5.72827	5.9558	18.4287	4.29863	3.09042	8.94818	13.5743	0.481799	7.01469	6.62188	8.71338	down	-0.395993	0.558622	0.686653	no	chr10	16869636	16918800	-
circRNA10704	11.9583	8.00612	6.85468	22.7116	4.89683	3.8624	10.4883	10.7108	0.564642	8.90349	6.90593	10.8855	down	-0.656503	0.32575	0.476808	no	chr10	16913811	16933284	-
circRNA10705	6.32738	4.49358	3.38884	13.1494	3.14115	2.05685	4.85835	1.26522	0.365236	5.28613	2.76636	6.10007	down	-1.14084	0.161759	0.299842	no	chr10	17084271	17088345	-
circRNA10706	18.3916	8.21792	8.19658	33.3568	6.05004	3.66151	9.94186	2.30629	0.540005	8.85674	5.06128	14.8426	down	-1.55217	0.130984	0.260716	no	chr10	17105457	17111050	-
circRNA10707	4.20476	9.90728	19.6019	4.06193	6.60052	3.37639	30.996	2.08053	3.70735	3.80607	8.79328	8.87528	down	-0.0133924	0.989976	0.993556	no	chr10	17359514	17390620	-
circRNA10708	5.50912	5.32234	8.60251	4.86477	5.59395	4.78863	9.25847	8.08846	6.96396	6.50526	7.12095	5.97854	up	0.252278	0.289808	0.441293	no	chr10	21681332	21682257	+
circRNA10709	17.9426	15.7533	18.038	16.7857	21.2749	19.6026	30.7844	17.1056	18.8134	25.1013	22.2815	17.9589	up	0.311143	0.166659	0.305647	no	chr10	21882282	21920963	-
circRNA1071	7.09291	7.45628	6.50037	6.50322	10.1564	5.59413	9.41381	15.0481	7.34477	9.08231	9.29662	7.54184	up	0.30179	0.353668	0.50365	no	chr7	33146242	33177591	+
circRNA10710	5.47504	4.09797	5.11133	4.85081	13.2611	8.50656	10.6008	7.1073	6.65548	12.4501	9.06404	6.55925	up	0.466624	0.254054	0.403587	no	chr10	22607927	22609717	-
circRNA10711	35.0021	40.2981	40.8971	35.626	28.2604	19.7601	34.8142	19.6919	48.4962	24.6177	29.476	36.0167	down	-0.289125	0.318613	0.470163	no	chr10	24432995	24474060	+
circRNA10712	7.53652	8.38785	8.87143	7.2517	5.52263	3.681	6.34746	4.49578	10.149	4.27342	5.78934	7.51402	down	-0.376188	0.237845	0.386824	no	chr10	24494500	24501545	+
circRNA10713	4.07115	4.69371	4.6167	4.05011	3.09311	2.44732	3.14	4.73388	3.77132	3.9733	3.61316	4.10496	down	-0.184104	0.339121	0.490074	no	chr10	27022558	27048979	-
circRNA10714	14.8271	13.3998	16.0801	15.8945	17.0156	19.8974	23.9431	25.1423	22.5901	18.9227	22.0991	15.4434	up	0.517	0.00241103	0.0455226	no	chr10	27119294	27126786	-
circRNA10715	0.718654	0.374745	0.588961	0.566931	0.716171	1.21667	0.834894	0.720754	0.894592	1.04423	0.942228	0.593092	up	0.667819	0.0128171	0.0764836	no	chr10	27167102	27171083	+
circRNA10716	9.08257	8.76394	11.1421	6.61729	5.14429	1.08252	1.29478	1.66327	1.95727	1.20988	1.44154	8.15003	down	-2.49919	0.0026324	0.0465657	yes	chr10	28119651	28131691	-
circRNA10717	22.9873	20.4347	26.3858	14.8988	16.9648	3.94938	5.2141	6.46878	6.38913	5.99923	5.60412	20.3343	down	-1.85935	0.00151877	0.0431249	yes	chr10	28131560	28150059	-
circRNA10718	84.2615	87.281	109.425	93.5848	122.138	102.815	121.421	122.437	119.11	123.683	117.893	99.3381	up	0.247059	0.0617846	0.165087	no	chr10	28535562	28614685	+
circRNA10719	19.4209	21.3586	22.3661	19.6527	24.432	20.358	27.6452	27.2049	24.1287	24.701	24.8076	21.4461	up	0.210067	0.072546	0.181213	no	chr10	28583399	28590832	+
circRNA1072	4.30271	5.17714	5.04652	3.70518	4.99047	3.5037	6.1295	10.7052	5.72694	5.25989	6.26505	4.6444	up	0.431832	0.251346	0.400691	no	chr7	33349068	33388144	+
circRNA10720	18.4726	22.8683	23.2185	17.0896	24.9908	17.6655	21.0079	23.8947	22.9628	26.3769	22.3816	21.328	up	0.0695642	0.629395	0.741932	no	chr10	31817788	31843586	-
circRNA10721	12.7908	14.5062	15.2105	12.0897	15.7212	11.8201	13.1888	16.2853	17.2591	18.762	15.4631	14.0637	up	0.136854	0.375816	0.525028	no	chr10	31826304	31854206	-
circRNA10722	3.86025	4.0656	4.42898	4.20431	6.59375	4.46167	6.32192	4.72367	5.05367	6.59817	5.43182	4.63058	up	0.230243	0.260436	0.410624	no	chr10	32291163	32293737	-
circRNA10723	22.4352	23.2504	24.1277	29.1164	23.6898	19.567	28.628	17.388	38.8854	21.07	25.1077	24.5239	up	0.0339413	0.892738	0.931061	no	chr10	32543300	32584304	+
circRNA10724	125.42	114.828	155.88	128.368	147.309	103.814	114.655	92.7612	122.478	125.44	111.83	134.361	down	-0.264812	0.0491836	0.14632	no	chr10	34131463	34341816	-
circRNA10725	0.656298	1.18751	1.17888	1.32245	1.26058	1.11932	1.05329	0.83533	1.38021	0.883431	1.05432	1.12114	down	-0.0886619	0.675325	0.779523	no	chr10	34269657	34269899	-
circRNA10726	4.94866	4.46123	6.22732	5.21904	5.58125	4.57047	5.17573	4.65022	4.39013	4.27397	4.61211	5.2875	down	-0.19716	0.0907686	0.205932	no	chr10	34317107	34360259	-
circRNA10727	4.53079	3.91194	5.52049	4.62724	4.58162	4.18211	4.23613	3.75359	3.72543	3.4868	3.87681	4.63442	down	-0.257517	0.0404746	0.132915	no	chr10	34347965	34360259	-
circRNA10728	1.80627	1.85591	1.96397	2.40336	2.97937	1.59586	1.46893	1.0419	1.19236	1.38012	1.33583	2.20178	down	-0.720928	0.0134248	0.0780692	no	chr10	34516979	34517159	-
circRNA10729	3.36614	2.73776	3.08203	3.67216	5.42842	8.28021	5.04773	5.50477	4.93355	6.93702	6.14066	3.6573	up	0.747613	0.0159051	0.0845369	no	chr10	43154897	43176032	+
circRNA1073	2.44095	2.71235	3.12885	2.06333	2.98878	1.91863	3.72386	6.11247	2.90139	3.1124	3.55375	2.66685	up	0.414203	0.282084	0.433335	no	chr7	33357855	33388144	+
circRNA10730	1.53216	1.50496	1.49843	2.054	1.66947	0.685375	1.17864	0.984051	1.57283	1.33133	1.15045	1.6518	down	-0.521849	0.0290079	0.113151	no	chr10	45962811	45964871	-
circRNA10731	7.756	11.0871	11.8867	10.9701	6.8104	18.941	13.5996	13.2443	10.7727	13.1932	13.9501	9.70208	up	0.523913	0.0377257	0.128404	no	chr10	46010223	46013639	-
circRNA10732	5.49217	5.7089	6.37288	7.526	6.79921	4.84409	5.81592	4.84935	6.87199	5.88496	5.65326	6.37983	down	-0.174434	0.206787	0.352633	no	chr10	49857306	49934163	-
circRNA10733	14.6817	20.003	18.9704	17.3753	18.7687	16.6298	12.3746	12.2612	13.6317	17.6874	14.5169	17.9598	down	-0.307036	0.0457821	0.141338	no	chr10	49952126	49958480	+
circRNA10734	0.617084	0.958521	0.65896	0.569692	0.692527	1.2676	0.990947	0.997973	0.518503	0.686773	0.89236	0.699357	up	0.351598	0.239029	0.388068	no	chr10	50048202	50059724	-
circRNA10735	21.5458	20.1209	27.2597	20.1423	17.3127	4.95944	7.65685	1.98881	10.616	7.50838	6.5459	21.2763	down	-1.70058	0.00016154	0.0316911	yes	chr10	60138964	60279639	-
circRNA10736	0.430048	0.679436	0.540805	0.258355	0.218711	0.436857	0.547447	0.411056	0.162431	0.573108	0.42618	0.425471	up	0.00240079	0.995148	0.997207	no	chr10	68465667	68470163	-
circRNA10737	1.3274	1.36452	1.75616	0.988254	1.14871	0.444403	1.17188	1.21377	1.8162	1.0561	1.14047	1.31701	down	-0.207636	0.510529	0.647372	no	chr10	68644698	68652594	+
circRNA10738	5.72013	6.81859	7.84141	3.43476	6.56482	2.22111	6.08392	5.96863	6.92915	3.86981	5.01452	6.07594	down	-0.276996	0.378334	0.527342	no	chr10	68651846	68686707	+
circRNA10739	4.34334	5.36033	3.15802	4.35735	4.02645	4.17235	4.67537	4.06984	4.09729	4.79024	4.36102	4.2491	up	0.0375091	0.782131	0.857141	no	chr10	68786136	68786692	+
circRNA1074	10.8771	16.1224	12.7325	13.8129	21.1248	12.9831	16.7283	17.5492	16.1056	29.5932	18.5919	14.934	up	0.316077	0.31383	0.465746	no	chr7	35667434	35673278	-
circRNA10740	6.29405	6.2737	5.31353	10.3244	6.62206	8.26431	10.2992	8.99458	9.49044	8.98326	9.20637	6.96555	up	0.402395	0.0593206	0.161284	no	chr10	70206264	70209685	-
circRNA10741	18.0865	18.4606	18.0101	17.6107	23.9781	19.6293	21.2324	18.0126	23.6159	18.9569	20.2894	19.2292	up	0.0774277	0.513369	0.64955	no	chr10	70844473	70868433	+
circRNA10742	4.38749	4.80098	4.92523	5.59995	4.25455	5.54674	5.41896	4.90209	5.75071	4.59586	5.24287	4.79364	up	0.129236	0.197467	0.341921	no	chr10	73146276	73163950	-
circRNA10743	1.6757	2.07014	1.96831	2.05474	1.74609	1.66894	2.19546	1.68086	2.39577	1.87213	1.96263	1.903	up	0.0445152	0.73023	0.819944	no	chr10	73154256	73156655	-
circRNA10744	2.07101	2.39809	2.82838	1.50682	2.48524	1.39356	1.53488	1.63114	2.5969	1.46806	1.72491	2.25791	down	-0.388467	0.12846	0.257439	no	chr10	73526647	73539593	-
circRNA10745	332.328	300.352	256.658	268.531	279.875	121.656	141.048	121.128	261.758	119.623	153.042	287.549	down	-0.909875	0.0049516	0.054431	no	chr10	79118915	79162133	+
circRNA10746	3.14015	2.37351	2.82148	2.79407	2.87524	2.76933	3.58068	3.40126	3.04163	3.12723	3.18403	2.80089	up	0.184966	0.0760425	0.185931	no	chr10	86470992	86473973	-
circRNA10747	80.7058	101.5	100.31	65.7141	90.3722	54.7337	77.6374	55.407	83.4932	70.5097	68.3562	87.7204	down	-0.35984	0.0604486	0.16297	no	chr10	86838865	86876085	+
circRNA10748	2.51791	3.53062	4.27326	3.19197	2.85092	3.00087	3.1926	2.87806	2.50159	3.45054	3.00473	3.27294	down	-0.123351	0.461174	0.602664	no	chr10	87151350	87158155	+
circRNA10749	23.4731	28.3231	27.8168	29.6391	29.2419	19.8937	19.5037	19.8641	24.3812	26.5053	22.0296	27.6988	down	-0.330381	0.0151765	0.082911	no	chr10	87784470	87814612	-
circRNA1075	13.2203	12.9339	15.05	11.5796	11.8074	7.42048	8.05618	10.0434	12.7882	8.89876	9.4414	12.9182	down	-0.452335	0.0182006	0.0899658	no	chr7	35781209	35794022	-
circRNA10750	14.7191	25.1063	45.9369	23.983	15.3103	1.15854	10.4951	32.97	2.60187	21.8508	13.8153	25.0111	down	-0.856305	0.212892	0.359696	no	chr10	89441108	89443859	-
circRNA10751	5.38856	6.9769	6.81727	6.34183	9.13686	7.48905	8.53564	7.9047	7.41572	7.9697	7.86296	6.93228	up	0.181742	0.212643	0.359488	no	chr10	91827017	91842391	+
circRNA10752	10.6554	12.6714	13.8451	11.1454	14.9568	13.719	14.2166	14.3286	11.2486	15.1651	13.7356	12.6548	up	0.118229	0.331982	0.483212	no	chr10	91840561	91851336	+
circRNA10753	7.46837	6.81416	6.66805	9.17743	8.85786	11.9326	10.34	9.99003	10.114	11.0984	10.695	7.79717	up	0.455915	0.00241029	0.0455226	no	chr10	91942422	91957293	+
circRNA10754	1.88409	1.88407	2.10469	2.22886	3.12843	2.08853	2.8664	2.9893	2.38877	3.3161	2.72982	2.24603	up	0.281429	0.166365	0.305308	no	chr10	92008829	92011415	+
circRNA10755	34.535	41.5474	46.8488	26.4851	21.7854	13.7509	14.8398	15.8959	20.4249	18.6489	16.7121	34.2403	down	-1.03481	0.0170822	0.0875886	yes	chr10	92081320	92181019	-
circRNA10756	42.078	52.2586	55.2818	32.2395	27.2126	17.0559	18.2345	19.6464	25.8537	24.1861	20.9953	41.8141	down	-0.993922	0.0161083	0.0851036	no	chr10	92111076	92192636	-
circRNA10757	9.1369	8.45778	11.2443	10.6815	8.23567	21.4205	10.639	10.7648	7.05514	17.6703	13.51	9.55122	up	0.500266	0.208282	0.354457	no	chr10	97656285	97664984	+
circRNA10758	7.31121	9.03763	8.72293	5.73582	5.13175	3.72604	4.38322	2.83096	7.9884	3.84882	4.55549	7.18787	down	-0.657958	0.0577417	0.158767	no	chr10	99884011	99900066	-
circRNA10759	7.15044	6.87521	6.85402	6.6455	8.23063	7.99191	9.3108	9.08869	9.25056	8.29978	8.78835	7.15116	up	0.297415	0.0029991	0.047871	no	chr10	101792839	101800400	-
circRNA1076	5.67329	6.64157	7.68411	6.2853	8.09872	4.92818	6.61286	7.63091	8.14268	7.93884	7.05069	6.8766	up	0.0360705	0.820835	0.883741	no	chr7	39987599	40002031	+
circRNA10760	1.54345	1.63265	1.69986	1.97608	2.17464	1.80302	2.9914	2.73497	2.79612	2.15908	2.49692	1.80533	up	0.467883	0.0327304	0.120255	no	chr10	101806045	101807901	-
circRNA10761	5.4484	6.77543	7.15472	4.51456	4.50351	5.284	5.92009	5.28115	6.32735	5.54681	5.67188	5.67932	down	-0.00189242	0.99043	0.993915	no	chr10	102699373	102705489	-
circRNA10762	24.8851	21.2644	15.8963	21.8815	11.4289	6.5514	8.61439	14.1625	12.1307	7.71375	9.83454	19.0712	down	-0.955468	0.0143517	0.0808229	no	chr10	103068629	103076270	+
circRNA10763	3.67929	4.0746	4.92966	4.7809	5.62141	4.76393	4.81937	4.02101	4.06532	4.60972	4.45587	4.61717	down	-0.0513026	0.686761	0.788179	no	chr10	103417792	103427391	+
circRNA10764	7.47132	7.18984	6.99659	7.67078	7.15951	5.1005	9.48107	5.92369	6.54679	6.54499	6.71941	7.29761	down	-0.11909	0.481383	0.621158	no	chr10	110100625	110130486	+
circRNA10765	7.28662	7.19604	7.91288	8.74644	6.49024	4.75707	8.98157	5.55955	6.40789	6.38611	6.41844	7.52644	down	-0.229746	0.216765	0.364073	no	chr10	110119211	110132400	+
circRNA10766	7.33494	5.83708	7.49223	6.80588	8.86573	10.6972	14.0806	12.7659	9.94063	12.889	12.0747	7.26717	up	0.732518	0.00120901	0.0414224	no	chr10	110885253	110890670	+
circRNA10767	3.37788	3.50302	4.71086	4.31877	6.13308	4.45941	6.1673	4.95034	5.4353	4.99686	5.20184	4.40872	up	0.238662	0.213708	0.360655	no	chr10	111000415	111004794	+
circRNA10768	20.3259	25.157	24.4644	15.7633	17.5998	4.59708	20.3276	8.47117	19.4287	9.14216	12.3933	20.6621	down	-0.737421	0.0613558	0.164384	no	chr10	114331803	114333295	-
circRNA10769	35.8017	44.9987	38.248	27.7645	35.6186	19.5454	16.8439	25.2845	14.359	18.7796	18.9625	36.4863	down	-0.944206	0.00117339	0.0412806	no	chr10	114487958	114491878	-
circRNA1077	2.63319	3.46129	3.13924	3.21863	3.69562	2.83979	4.15982	4.30064	4.47678	4.40265	4.03594	3.22959	up	0.321551	0.0588724	0.160477	no	chr7	39997494	40002031	+
circRNA10770	2.987	2.92741	3.03944	2.61573	3.90831	3.52815	5.05612	3.59069	3.72497	4.13073	4.00613	3.09558	up	0.372002	0.0355643	0.124928	no	chr10	114843741	114848737	+
circRNA10771	0.896257	1.64883	2.33661	0.797433	1.52201	0.999322	0.147159	0.072822	0.382696	0.111817	0.342763	1.44023	down	-2.07101	0.0133517	0.0780074	yes	chr10	115120185	115165645	+
circRNA10772	1.66855	2.73083	4.6179	2.02847	2.58888	1.90851	0.193129	0.109487	0.690726	0.125525	0.605475	2.72693	down	-2.17114	0.0106592	0.0710266	yes	chr10	115120185	115394752	+
circRNA10773	1.21026	1.76158	3.04503	1.42029	1.56562	1.20241	0.0883874	0.0437036	0.460564	0.0438968	0.367792	1.80055	down	-2.29148	0.00805488	0.0631063	yes	chr10	115215697	115286397	+
circRNA10774	0.85798	1.31033	2.157	1.05132	1.31309	0.780435	0.0563283	0.0285696	0.361415	0.0407881	0.253507	1.33794	down	-2.39992	0.00479027	0.053817	yes	chr10	115281355	115334419	+
circRNA10775	2.02384	2.54943	1.98832	2.00291	2.08833	2.05561	2.03514	2.0888	1.79337	1.58443	1.91147	2.13057	down	-0.156554	0.166405	0.305328	no	chr10	119898427	119898959	+
circRNA10776	1.79607	2.12565	2.58735	2.37861	1.99816	2.37232	2.67835	2.19274	2.35116	1.83462	2.28584	2.17717	up	0.0702714	0.594084	0.715209	no	chr10	119902799	119904277	+
circRNA10777	15.5748	17.9246	17.9394	14.916	18.3135	17.8576	17.4631	20.0928	17.9309	17.8488	18.2386	16.9337	up	0.107103	0.165974	0.304934	no	chr10	120852524	120883888	+
circRNA10778	20.7713	24.9783	24.442	21.4586	25.7508	22.4381	22.017	22.7537	23.6473	22.7714	22.7255	23.4802	down	-0.0471323	0.499195	0.637192	no	chr10	120890716	120903232	+
circRNA10779	28.3447	48.2168	61.5258	20.4361	25.3813	24.6531	10.7811	33.4609	31.6732	13.5283	22.8193	36.7809	down	-0.688704	0.169978	0.309321	no	chr10	121515123	121565704	-
circRNA1078	8.48835	5.25458	4.22454	15.9148	2.49616	0.434846	1.51675	0.13326	0.223771	0.572854	0.576297	7.27568	down	-3.6582	0.0470724	0.143372	yes	chr7	43450828	43509121	+
circRNA10780	1.60999	1.78847	1.52246	1.75331	1.84054	1.21713	1.93747	1.18833	1.27133	1.42339	1.40753	1.70295	down	-0.274876	0.102785	0.222661	no	chr10	121910906	121913893	-
circRNA10781	8.96873	13.3456	9.81365	12.2567	15.0778	9.94154	14.5927	9.93933	11.1939	9.81776	11.097	11.8925	down	-0.0998775	0.597828	0.718263	no	chr10	121959324	121961517	-
circRNA10782	2.77455	3.72597	5.12143	4.1558	11.2359	21.026	10.9279	47.0437	6.78771	10.3731	19.2317	5.40274	up	1.83172	0.13333	0.263808	no	chr10	124012333	124046724	-
circRNA10783	43.1351	48.2542	53.2982	42.7254	52.1708	45.931	55.4882	53.6504	61.5009	46.5211	52.6183	47.9168	up	0.135036	0.236815	0.385737	no	chr10	124774675	124790338	-
circRNA10784	4.13556	4.99626	5.10359	3.57474	4.35324	1.94617	3.51845	3.39537	4.221	2.73987	3.16417	4.43268	down	-0.48635	0.0312052	0.117104	no	chr10	126970702	127037816	+
circRNA10785	6.20612	7.6544	8.15948	5.65783	6.75444	3.22801	5.63301	5.09196	6.64024	4.25067	4.96878	6.88645	down	-0.47087	0.0337872	0.121809	no	chr10	126970702	127110354	+
circRNA10786	4.7401	5.49754	6.84506	4.94561	5.11626	2.62009	4.34548	4.25867	5.54326	3.51545	4.05659	5.42891	down	-0.420396	0.0574529	0.158454	no	chr10	127042625	127061776	+
circRNA10787	57.688	46.1055	54.0321	56.5146	60.95	52.2829	62.4899	54.0555	57.2869	45.7592	54.3749	55.058	down	-0.0180124	0.859219	0.909315	no	chr10	130145211	130160997	+
circRNA10788	4.59977	1.93754	2.69659	2.17337	2.82219	0.90879	1.68287	1.11374	3.80522	1.06838	1.7158	2.84589	down	-0.730001	0.152518	0.288124	no	chr17	319420	321415	-
circRNA10789	3.92507	2.44547	2.26054	3.34186	3.55432	3.20919	2.83565	2.31008	2.84076	2.32295	2.70373	3.10545	down	-0.199853	0.313024	0.464947	no	chr17	653291	655953	-
circRNA1079	2.87895	1.38943	1.15059	3.13905	0.699812	0.144744	0.416379	0.129552	0	0.0536271	0.14886	1.85156	down	-3.63671	0.0241526	0.103682	yes	chr7	43492075	43501322	+
circRNA10790	1.6757	3.42611	3.32136	2.32076	3.62381	1.44908	2.08803	4.47235	5.61099	1.99015	3.12212	2.87355	up	0.119693	0.790848	0.863557	no	chr17	819439	826078	-
circRNA10791	22.0122	22.4941	27.9061	22.7468	16.3624	26.8513	28.6811	22.9948	31.2561	17.0703	25.3707	22.3043	up	0.185842	0.350534	0.500582	no	chr17	1361092	1365058	-
circRNA10792	1.65157	1.93359	1.86155	1.29601	2.35853	2.64631	2.51045	3.12081	2.19777	3.43889	2.78284	1.82025	up	0.612424	0.00989865	0.0690649	no	chr17	1799857	1804715	-
circRNA10793	3.87475	3.08464	1.81705	3.95367	2.88977	3.6952	2.19992	2.6518	2.45107	2.1464	2.62888	3.12398	down	-0.248937	0.335034	0.486057	no	chr17	2394043	2395454	-
circRNA10794	4.02437	3.94878	3.93424	4.08173	3.80525	4.8417	4.41925	4.01542	2.98848	3.74498	4.00197	3.95887	up	0.015619	0.898335	0.934648	no	chr17	4049708	4051043	-
circRNA10795	9.58235	10.3261	8.21416	9.31448	8.56817	10.7737	11.8363	8.46222	7.82233	10.6866	9.91622	9.20106	up	0.107991	0.431172	0.5763	no	chr17	4066447	4075429	-
circRNA10796	1.48078	2.36504	2.09301	3.45918	3.21461	0.640262	0.348974	0.859589	0.548357	1.6605	0.811536	2.52252	down	-1.63614	0.00576148	0.0565627	yes	chr17	4952795	4953845	+
circRNA10797	3.19542	3.75288	3.11643	3.53535	3.53295	3.63501	3.58546	3.21611	3.20055	3.92908	3.51324	3.4266	up	0.0360229	0.646035	0.755628	no	chr17	5346790	5361675	+
circRNA10798	1.56227	1.61238	1.50781	1.40645	1.66194	1.41577	1.49271	1.39476	1.82664	1.2779	1.48156	1.55017	down	-0.0653094	0.530638	0.663896	no	chr17	5361208	5363016	+
circRNA10799	6.673	8.93345	6.3621	8.74145	8.1173	4.34706	7.35573	5.53301	9.53986	7.18629	6.79239	7.76546	down	-0.193152	0.378053	0.527127	no	chr17	5394891	5399650	-
circRNA108	6.79064	8.19763	9.75146	6.33214	6.32935	4.67336	5.04278	4.6082	9.9863	5.47136	5.9564	7.48024	down	-0.328645	0.251048	0.40042	no	chr13	98409338	98412034	+
circRNA1080	14.3895	8.80813	11.2166	9.14253	9.603	8.77585	9.36937	16.6133	6.62474	10.5042	10.3775	10.632	down	-0.0349497	0.901068	0.9364	no	chr7	43965867	43973323	-
circRNA10800	12.1427	9.26219	8.59841	10.2664	11.9156	6.05936	5.89606	5.10621	5.82241	6.96902	5.97061	10.4371	down	-0.805766	0.00159823	0.0431249	no	chr17	7321865	7322866	-
circRNA10801	29.424	28.2567	21.3358	37.3871	22.1627	21.9449	9.45199	25.5679	17.5077	13.4048	17.5755	27.7133	down	-0.657015	0.0382098	0.129228	no	chr17	8144751	8144993	-
circRNA10802	10.4884	8.15902	10.357	10.599	5.54495	9.31841	12.3589	14.0118	9.22228	7.94058	10.5704	9.02965	up	0.227285	0.332893	0.484197	no	chr17	10725011	10726264	-
circRNA10803	1.80892	4.62444	1.53931	1.99712	3.14631	0.957725	1.43552	1.00959	2.27848	1.0645	1.34916	2.62322	down	-0.959275	0.0910578	0.206314	no	chr17	12705128	12723008	+
circRNA10804	5.18944	5.70788	5.30744	4.28818	5.29191	0.547271	3.50491	3.34064	3.73236	0.608285	2.34669	5.15697	down	-1.1359	0.0150777	0.0825885	yes	chr17	12943588	12944196	+
circRNA10805	42.1189	42.1762	45.626	36.8024	34.9834	38.6261	43.1271	39.5277	46.7289	44.951	42.5922	40.3414	up	0.078328	0.393283	0.542042	no	chr17	16034765	16048988	-
circRNA10806	5.03531	5.85438	6.17864	4.49643	5.18136	4.1173	5.11588	4.42348	4.52208	5.4965	4.73505	5.34923	down	-0.175951	0.1554	0.291903	no	chr17	16057514	16086442	-
circRNA10807	8.45909	11.3952	11.0322	9.08237	10.736	7.91755	10.9088	9.80727	10.4362	12.5163	10.3172	10.141	up	0.0248567	0.857108	0.907865	no	chr17	16137311	16165161	-
circRNA10808	1.42047	1.59665	1.54711	1.63768	1.5055	1.37726	1.62882	1.14201	1.92462	1.63769	1.54208	1.54148	up	0.000559787	0.996711	0.997765	no	chr17	18865469	18865952	+
circRNA10809	3.80914	7.34306	6.03626	3.94747	3.96662	6.22521	5.02235	3.93533	11.5995	4.43541	6.24356	5.02051	up	0.314536	0.464172	0.60558	no	chr17	19328711	19329647	+
circRNA1081	91.5749	98.4312	115.264	89.1133	134.271	91.181	130.138	184.555	101.766	158.542	133.236	105.731	up	0.333592	0.206381	0.3522	no	chr7	44404440	44427703	-
circRNA10810	1.9633	4.66648	4.0558	8.29382	6.61778	6.00755	6.82169	4.85098	3.97697	4.41525	5.21449	5.11944	up	0.0265409	0.939886	0.961452	no	chr17	19843121	19845377	-
circRNA10811	2.03909	1.94392	2.47101	2.51112	3.67541	2.53894	3.92615	3.4224	2.18786	2.42449	2.89997	2.52811	up	0.197978	0.434832	0.579434	no	chr17	20204333	20227620	+
circRNA10812	23.1715	23.0312	24.3437	25.3972	22.0118	20.9161	25.0521	19.2204	24.4419	17.2792	21.3819	23.5911	down	-0.141847	0.224468	0.372521	no	chr17	21017942	21021226	-
circRNA10813	31.6613	45.3368	39.1516	39.3393	37.3052	31.2293	40.3833	33.2218	65.794	42.1599	42.5577	38.5588	up	0.142358	0.567862	0.693791	no	chr17	27550568	27558187	+
circRNA10814	5.52809	5.48354	5.62901	5.52846	6.87273	5.67555	7.71691	6.1257	6.11973	6.81327	6.49023	5.80836	up	0.160139	0.167401	0.306318	no	chr17	29451455	29498521	+
circRNA10815	5.80731	5.5249	7.44652	8.67629	8.38327	9.7915	10.5679	8.15954	6.98341	10.3103	9.16253	7.16766	up	0.354244	0.0676601	0.173899	no	chr17	29635968	29672129	-
circRNA10816	5.48681	4.87628	4.8184	5.31107	5.10248	5.97251	7.48105	5.95373	7.20328	6.85297	6.69271	5.11901	up	0.386726	0.00490208	0.0541313	no	chr17	30266885	30272899	-
circRNA10817	10.0266	12.4042	12.7826	9.47886	12.4134	11.8742	11.9851	10.4326	13.2181	10.7017	11.6423	11.4211	up	0.0276802	0.802329	0.871645	no	chr17	30785919	30793672	-
circRNA10818	10.3343	10.8807	12.8684	12.3936	11.561	10.4588	14.9803	13.4284	13.5395	11.5863	12.7986	11.6076	up	0.140919	0.240787	0.389858	no	chr17	31155983	31206371	+
circRNA10819	6.56775	6.57593	5.91286	5.83302	7.40366	5.90449	7.15838	7.72428	7.66204	5.61285	6.81241	6.45864	up	0.0769338	0.523808	0.657999	no	chr17	31223444	31227606	+
circRNA1082	3.10878	2.68272	3.84727	2.74635	2.83977	2.50913	2.9577	3.70953	2.62225	4.24421	3.20856	3.04498	up	0.0754954	0.691932	0.791714	no	chr7	44425900	44427703	-
circRNA10820	3.77437	3.66573	3.24976	2.47207	3.99641	3.44781	3.22949	3.86358	4.11219	2.36319	3.40325	3.43167	down	-0.0119967	0.945749	0.965031	no	chr17	31226435	31226684	+
circRNA10821	10.3627	9.32874	7.4477	8.73389	8.66145	3.03772	2.8515	3.62517	3.37254	3.65775	3.30893	8.9069	down	-1.42856	0.000115195	0.0299572	yes	chr17	31517651	31517877	+
circRNA10822	3.43253	4.25081	4.07418	2.41674	3.71519	3.69136	5.12789	3.47422	4.12842	3.27809	3.94	3.57789	up	0.139086	0.454832	0.597112	no	chr17	31993865	31994721	+
circRNA10823	1.82412	5.07782	3.43773	3.13273	5.72692	3.1799	5.59538	9.27794	10.6508	8.6273	7.46625	3.83987	up	0.959329	0.0548259	0.154525	no	chr17	32030656	32031458	+
circRNA10824	3.61823	5.83148	8.4764	6.04554	2.847	4.38581	4.39106	5.88821	2.86301	3.05045	4.11571	5.36373	down	-0.382096	0.312078	0.464071	no	chr17	34942484	34958694	-
circRNA10825	10.2797	9.18448	10.9538	10.7883	10.9784	9.81088	11.0802	10.8579	13.6972	9.49449	10.9881	10.4369	up	0.0742442	0.52544	0.659652	no	chr17	35624397	35641975	+
circRNA10826	2.68316	4.69155	6.51837	4.32986	5.66303	4.02426	3.58983	4.64024	4.10557	5.37286	4.34655	4.77719	down	-0.136291	0.571214	0.696292	no	chr17	37246826	37253036	-
circRNA10827	5.2268	5.4137	6.39767	6.79239	8.56192	5.84801	6.98372	4.95469	6.98634	8.46863	6.64828	6.47849	up	0.0373218	0.845317	0.90023	no	chr17	37411269	37442652	+
circRNA10828	1.9433	1.92623	2.08615	2.29003	2.96347	2.21937	3.22717	2.5076	2.41458	2.79608	2.63296	2.24184	up	0.232004	0.170964	0.310559	no	chr17	37437738	37440662	+
circRNA10829	15.9037	15.4863	15.32	17.9256	19.3409	23.675	25.7872	19.3099	18.7341	26.5415	22.8095	16.7953	up	0.441577	0.0164306	0.0859323	no	chr17	37535979	37539245	-
circRNA1083	17.7411	18.1404	15.6349	22.3222	11.9051	12.7394	12.5585	14.2092	13.952	15.7931	13.8504	17.1487	down	-0.30817	0.126995	0.255484	no	chr7	44645327	44647759	+
circRNA10830	3.29366	3.93876	3.69428	4.04209	4.98515	5.16483	5.04673	4.8637	4.18066	6.53345	5.15787	3.99079	up	0.370103	0.0422291	0.135974	no	chr17	37553115	37577613	-
circRNA10831	8.20189	8.2177	8.05207	6.85107	9.71079	10.7648	9.07273	9.17166	8.19479	13.7137	10.1835	8.2067	up	0.311363	0.118678	0.243772	no	chr17	37576341	37586549	-
circRNA10832	1.98155	4.46514	5.87204	1.73622	5.30159	2.30445	4.42834	3.75494	5.08879	3.79461	3.87423	3.87131	up	0.00108674	0.997694	0.998499	no	chr17	37625895	37628672	-
circRNA10833	10.293	10.6578	11.0327	10.4294	10.6675	8.1331	10.0835	11.574	8.48539	8.74752	9.4047	10.6161	down	-0.1748	0.12934	0.25858	no	chr17	38361711	38395998	+
circRNA10834	2.15514	2.16775	2.30911	1.81678	2.19773	2.06539	2.01736	1.93848	2.17615	1.90436	2.02035	2.1293	down	-0.0757758	0.295668	0.448053	no	chr17	39415026	39432016	-
circRNA10835	0.943612	1.46128	1.47982	1.02857	1.20592	1.38806	1.17521	1.34374	1.51492	1.51287	1.38696	1.22384	up	0.18051	0.240514	0.389598	no	chr17	39423327	39427790	-
circRNA10836	15.2479	16.1525	19.4556	19.8901	19.463	16.9312	16.0952	17.3889	28.0741	18.6287	19.4236	18.0419	up	0.106466	0.588353	0.710528	no	chr17	40126183	40126406	+
circRNA10837	2.78742	1.20547	0.809081	3.10073	0.760398	0	0	0	0	0	0	1.73262	down	-Inf	0.0261855	0.107489	yes	chr17	40495987	40496520	-
circRNA10838	15.1192	13.6993	16.5932	12.7089	15.0039	14.7057	16.3774	13.4571	19.4561	13.5447	15.5082	14.6249	up	0.0846055	0.520516	0.655129	no	chr17	40632195	40637572	-
circRNA10839	9.2006	8.35287	8.89005	14.2684	11.8307	33.0237	37.8778	30.011	23.5402	24.842	29.8589	10.5085	up	1.5066	0.000806314	0.0385381	yes	chr17	41871689	41884274	-
circRNA1084	22.1062	28.1068	19.1102	35.1608	13.4892	18.5476	17.8826	17.7721	19.0038	16.0202	17.8453	23.5947	down	-0.402919	0.199108	0.343563	no	chr7	44700141	44701615	+
circRNA10840	10.9884	12.3402	15.783	11.8856	13.4634	15.6253	14.3428	10.4946	12.7007	12.3754	13.1078	12.8921	up	0.0239307	0.862393	0.910738	no	chr17	41996311	42003557	-
circRNA10841	0.993647	1.38071	1.16064	1.02033	1.33376	0.637631	0.739375	0.764805	0.991618	0.899794	0.806645	1.17782	down	-0.546109	0.00670567	0.0601517	no	chr17	42727662	42730918	-
circRNA10842	10.4796	10.3428	15.7213	13.6968	9.5749	10.4629	9.05562	7.30004	11.6815	8.16497	9.333	11.9631	down	-0.358176	0.105457	0.226234	no	chr17	42838731	42839380	+
circRNA10843	2.96727	3.76936	4.49928	5.09271	3.90909	9.28813	7.28841	11.9253	9.38904	10.6785	9.71387	4.04754	up	1.263	0.000726683	0.0379186	yes	chr17	43090944	43099880	-
circRNA10844	6.6979	6.55027	6.56677	6.09682	7.4544	6.15789	7.95704	6.16639	7.89066	6.94606	7.02361	6.67323	up	0.0738266	0.466292	0.607331	no	chr17	43521369	43522226	+
circRNA10845	4.14887	3.159	4.51463	2.96437	3.19645	3.28975	2.78906	5.28009	4.01688	2.21564	3.51828	3.59666	down	-0.0317881	0.902277	0.937069	no	chr17	47361378	47391580	+
circRNA10846	10.543	9.88903	11.6869	10.3953	9.68561	9.2819	8.42532	13.0122	11.4652	8.02195	10.0413	10.4399	down	-0.0561663	0.710218	0.80534	no	chr17	47370437	47429961	+
circRNA10847	4.12258	3.93967	4.41577	4.38901	4.18045	5.20288	4.44593	7.64212	8.94865	4.65304	6.17852	4.20949	up	0.553615	0.0929992	0.209233	no	chr17	47599676	47601747	+
circRNA10848	4.00348	5.01173	5.90501	5.01534	5.0189	7.10957	7.74865	5.79758	5.83392	5.36571	6.37109	4.99089	up	0.352242	0.0385285	0.129696	no	chr17	47664159	47670832	+
circRNA10849	3.33618	5.00886	4.52225	5.1553	5.45273	5.95918	2.87856	4.78339	3.66356	3.94258	4.24546	4.69507	down	-0.145225	0.506779	0.643951	no	chr17	48112031	48113401	+
circRNA1085	14.2222	15.6368	16.9239	17.4743	19.1402	13.5212	21.4006	17.5661	15.7593	18.2188	17.2932	16.6795	up	0.0521308	0.704904	0.801229	no	chr7	45736787	45759174	-
circRNA10850	2.82612	3.401	3.04506	3.06312	3.26417	2.57026	3.00254	2.81536	3.4302	2.66649	2.89697	3.11989	down	-0.106952	0.25918	0.409231	no	chr17	49298106	49312845	-
circRNA10851	3.9706	2.27454	7.39794	3.65802	9.18169	33.2011	16.9436	69.3622	15.1943	32.928	33.5258	5.29656	up	2.66215	0.0434543	0.137838	yes	chr17	50667554	50669528	+
circRNA10852	3.32154	3.96572	3.90282	4.52871	3.64937	3.87253	5.51776	4.77548	3.20241	4.47626	4.36889	3.87363	up	0.173578	0.305334	0.457641	no	chr17	50989677	50993935	-
circRNA10853	7.88571	7.87059	8.51929	9.02029	8.44836	8.23135	10.8842	8.20487	6.49346	9.49615	8.662	8.34885	up	0.0531232	0.699813	0.797532	no	chr17	51014232	51021365	-
circRNA10854	4.35019	5.87929	6.75518	4.28538	7.82968	8.16799	8.1985	8.50508	6.28394	7.2405	7.6792	5.81994	up	0.399951	0.0555127	0.15543	no	chr17	58703196	58720812	+
circRNA10855	1.86689	1.71705	2.11031	1.62453	2.38077	1.61954	2.06108	1.94122	1.8833	2.00217	1.90146	1.93991	down	-0.0288813	0.814713	0.879651	no	chr17	59012328	59028723	-
circRNA10856	2.90923	3.48846	3.27055	2.85578	3.88996	2.70086	3.89804	3.3434	3.38357	3.73869	3.41291	3.2828	up	0.0560787	0.656533	0.76453	no	chr17	59047683	59084089	-
circRNA10857	1.15445	1.66709	1.14444	1.05682	1.52575	0.492871	1.33142	1.04195	1.19778	1.63813	1.14043	1.30971	down	-0.19967	0.475828	0.615902	no	chr17	59079754	59084089	-
circRNA10858	1.4347	2.16454	1.96813	1.79989	2.37091	1.68827	2.02421	2.12071	2.79993	1.45543	2.01771	1.94763	up	0.0509988	0.808852	0.876186	no	chr17	59874539	59891041	-
circRNA10859	18.0668	21.6525	22.3037	23.6707	32.4471	33.9927	29.6668	34.3584	23.8322	32.6337	30.8968	23.6282	up	0.386948	0.0474891	0.143969	no	chr17	60271350	60288682	-
circRNA1086	0.0983926	0.919509	3.1192	0.126734	0.715763	0	0.0220839	0.00362645	0.954285	1.40169	0.476337	0.99592	down	-1.06405	0.439417	0.583386	no	chr7	48219354	48249351	+
circRNA10860	13.0787	11.985	13.249	16.5766	13.5407	13.6542	14.6553	18.5212	18.3982	16.0436	16.2545	13.686	up	0.248138	0.0746643	0.184124	no	chr17	60623521	60648082	+
circRNA10861	9.01354	10.9869	9.94646	9.42384	10.0618	6.14461	17.0622	11.7992	9.9125	8.054	10.5945	9.88652	up	0.0997808	0.727304	0.818114	no	chr17	60989971	61040892	+
circRNA10862	10.4257	11.5874	12.5292	9.46488	12.5058	6.75998	15.2586	11.2678	10.4232	7.75634	10.2932	11.3026	down	-0.134969	0.556447	0.685151	no	chr17	61034666	61084564	+
circRNA10863	13.7119	11.8474	11.6038	10.9798	10.1061	6.65847	10.5921	10.6946	11.8481	5.66043	9.09073	11.6498	down	-0.357839	0.111591	0.234389	no	chr17	61362733	61367704	-
circRNA10864	2.31322	2.1542	2.56961	2.62172	2.64956	2.07808	2.68008	1.93652	2.43668	2.18195	2.26266	2.46166	down	-0.121611	0.263673	0.414096	no	chr17	61960867	61962971	-
circRNA10865	3.27452	3.44755	3.42695	3.41115	3.93455	3.10606	3.80607	3.42045	3.75145	3.44665	3.50614	3.49895	up	0.00296155	0.967278	0.979319	no	chr17	61972727	61983114	-
circRNA10866	10.4599	9.80747	10.7199	11.5232	12.1564	9.83294	10.9406	8.48405	10.4026	10.1599	9.96401	10.9334	down	-0.13394	0.134325	0.264858	no	chr17	62010550	62063301	-
circRNA10867	12.0208	10.2673	11.604	12.7486	12.7543	10.8803	11.8488	9.15435	10.9141	10.8893	10.7374	11.879	down	-0.145776	0.10938	0.231781	no	chr17	62029541	62063301	-
circRNA10868	8.08409	11.4402	12.9769	9.12588	13.1303	11.3132	14.4285	15.4074	13.4255	12.5926	13.4334	10.9515	up	0.294702	0.08445	0.197689	no	chr17	62586135	62602180	+
circRNA10869	20.5117	28.5875	21.3672	19.5344	22.3868	43.7789	37.9448	32.4402	58.4538	32.9113	41.1058	22.4775	up	0.870859	0.0148819	0.0820337	no	chr17	63193991	63267873	+
circRNA1087	1.7264	0.960252	0.847051	1.69806	0.89249	1.24325	4.35917	3.17152	3.26791	2.01206	2.81078	1.22485	up	1.19837	0.0394614	0.131346	yes	chr7	50703821	50705323	-
circRNA10870	6.67801	10.61	9.61508	6.77185	6.09089	16.0358	11.9573	13.2794	19.8424	11.9346	14.6099	7.95317	up	0.877344	0.00770469	0.0625143	no	chr17	63340101	63355390	+
circRNA10871	35.8932	33.4046	42.3783	40.4334	45.9096	38.679	39.7207	34.2497	41.0333	41.6751	39.0716	39.6038	down	-0.0195204	0.843872	0.899197	no	chr17	63710728	63728413	-
circRNA10872	16.9311	18.257	17.5267	17.7364	28.2753	57.0896	89.888	117.449	57.1221	56.0417	75.518	19.7453	up	1.93531	0.00967437	0.0683179	yes	chr17	64369750	64378117	-
circRNA10873	14.3284	18.3696	21.0538	16.4577	16.9117	11.9481	18.0374	20.1292	21.7259	17.3554	17.8392	17.4243	up	0.0339533	0.841732	0.897422	no	chr17	64886086	64892600	-
circRNA10874	10.8917	12.1589	15.4085	11.3996	14.6661	14.1217	24.1178	25.4089	21.3323	21.4674	21.2896	12.905	up	0.722223	0.00909142	0.0662293	no	chr17	66062963	66132763	-
circRNA10875	176.409	172.532	177.521	194.818	212.473	96.7624	84.6537	47.6402	134.035	105.267	93.6717	186.75	down	-0.995427	0.00106112	0.0400953	no	chr17	66496201	66742760	+
circRNA10876	4.5969	4.4344	4.00677	5.39694	4.001	2.07288	2.11544	0.951141	3.43332	2.01112	2.11678	4.4872	down	-1.08394	0.00157682	0.0431249	yes	chr17	66687111	66688436	+
circRNA10877	13.1359	16.9016	17.2518	18.1226	21.5753	20.5954	22.286	33.7037	20.964	25.2964	24.5691	17.3974	up	0.497969	0.0401722	0.132339	no	chr17	67166478	67195470	-
circRNA10878	16.7683	17.7752	20.9029	21.9286	24.293	30.8268	27.1036	46.1014	32.7816	28.5252	33.0677	20.3336	up	0.701557	0.0163328	0.0856271	no	chr17	67193967	67195470	-
circRNA10879	23.0441	24.594	28.468	23.0839	29.8947	23.9412	29.5926	28.0903	35.1321	29.5294	29.2571	25.817	up	0.180469	0.172938	0.31323	no	chr17	67874817	67894165	+
circRNA1088	2.68407	2.2959	0.858205	3.09728	1.10418	1.75771	5.12746	5.12226	4.13893	2.30641	3.69055	2.00793	up	0.878131	0.0845689	0.197856	no	chr7	50755887	50756056	-
circRNA10880	8.3006	9.19333	9.89191	7.80399	6.09042	10.4336	9.78393	14.6222	11.0611	8.61771	10.9037	8.25605	up	0.401295	0.0649004	0.169903	no	chr17	68250188	68251178	+
circRNA10881	17.0872	12.5151	14.1351	19.8934	14.97	30.5377	26.0159	16.0664	17.9799	23.054	22.7308	15.7201	up	0.532033	0.0552669	0.155054	no	chr17	68444493	68452992	-
circRNA10882	7.10168	9.31408	7.79026	6.92739	8.39862	7.07345	7.93455	7.18614	7.7689	7.24163	7.44094	7.90641	down	-0.0875379	0.366613	0.515666	no	chr17	73199865	73206817	+
circRNA10883	13.9049	13.8108	11.1602	10.6866	11.7377	11.1791	12.465	12.3567	12.3335	10.5397	11.7748	12.26	down	-0.0582565	0.553979	0.683159	no	chr17	75485428	75489368	+
circRNA10884	0.352418	0.68989	0.606745	0.313028	0.519304	0.11356	0.195642	0.158683	0.26339	0.186754	0.183606	0.496277	down	-1.43453	0.00975496	0.0685811	yes	chr17	76287192	76294021	-
circRNA10885	7.33706	7.32855	7.47244	6.83319	8.65399	8.71375	10.6268	10.7452	10.3597	8.9015	9.86938	7.52504	up	0.39126	0.00305898	0.0480518	no	chr17	76741969	76776541	+
circRNA10886	14.1787	14.9444	12.5374	14.8997	22.3131	22.1936	23.768	23.9391	20.3221	23.2313	22.6908	15.7747	up	0.524498	0.0116362	0.073536	no	chr17	78414879	78419725	+
circRNA10887	13.9254	14.695	13.7268	12.2026	13.2257	18.5989	11.0849	9.31925	10.4007	14.6033	12.8014	13.5551	down	-0.0825351	0.686294	0.787774	no	chr17	80222655	80227960	+
circRNA10888	19.4516	17.2668	17.8916	22.6022	22.346	22.4746	21.6313	18.9607	12.9673	23.2098	19.8487	19.9117	down	-0.00456566	0.977715	0.985569	no	chr17	81567417	81572088	-
circRNA10889	9.60137	12.6687	12.4749	9.59004	12.2703	8.51398	8.53742	7.51188	6.59921	8.87733	8.00797	11.3211	down	-0.499501	0.005823	0.0567948	no	chr17	82563354	82571870	+
circRNA1089	35.7554	34.2242	41.5404	34.6572	28.3048	21.7175	22.9671	39.1201	43.687	25.8359	30.6655	34.8964	down	-0.18646	0.428387	0.573721	no	chr7	55978126	55981567	+
circRNA10890	2.76773	2.13206	2.31508	2.47061	3.07664	2.20443	2.11264	2.21298	2.19276	2.07265	2.15909	2.55242	down	-0.241442	0.0779622	0.188631	no	chr17	82763965	82772507	+
circRNA10891	14.1684	12.6166	13.9842	12.6783	15.0724	12.5187	22.6698	18.918	21.0774	16.3712	18.311	13.704	up	0.418117	0.0604005	0.162915	no	chr17	82884145	82893632	+
circRNA10892	14.6411	17.1315	12.9843	12.6562	16.76	11.9696	12.3896	14.3412	13.3872	12.456	12.9087	14.8346	down	-0.200624	0.111344	0.234111	no	chr16	1385208	1390694	-
circRNA10893	12.5138	9.62539	9.40623	7.05659	13.0497	9.66201	8.72784	9.19319	9.25263	7.23482	8.8141	10.3303	down	-0.229002	0.253117	0.402558	no	chr16	1397178	1403344	-
circRNA10894	6.27009	7.93262	6.82499	5.54777	5.2	8.27611	5.58845	5.91832	6.94547	5.75398	6.49647	6.3551	up	0.0317414	0.844852	0.899909	no	chr16	2262278	2263287	-
circRNA10895	69.0846	49.9333	55.6782	60.8173	58.2586	58.4758	35.0733	45.6176	41.1834	42.0412	44.4783	58.7544	down	-0.401596	0.0223482	0.099655	no	chr16	2557703	2566453	+
circRNA10896	25.7157	23.3854	23.8572	22.6281	17.5921	18.8742	15.4056	10.1192	12.6557	12.6788	13.9467	22.6357	down	-0.698678	0.00263249	0.0465657	no	chr16	3476222	3479600	+
circRNA10897	9.24363	10.7783	13.4974	13.1572	11.388	11.3291	12.1073	11.3878	14.2455	14.7285	12.7596	11.6129	up	0.135858	0.313693	0.465628	no	chr16	8915254	8917156	-
circRNA10898	9.43062	10.4556	11.8607	8.14944	10.1922	7.70704	6.28126	5.76399	10.4245	6.86251	7.40786	10.0177	down	-0.435428	0.0363039	0.126101	no	chr16	11020193	11051641	+
circRNA10899	15.0408	21.1672	21.5968	17.9817	16.9562	25.1876	18.3901	16.3843	17.5675	23.8715	20.2802	18.5485	up	0.128766	0.450945	0.593769	no	chr16	11684165	11688445	-
circRNA109	10.5429	9.31089	11.0452	11.6891	10.6827	9.85287	14.2507	10.7126	17.6575	9.67068	12.4289	10.6542	up	0.222278	0.321686	0.473525	no	chr13	99238427	99244624	+
circRNA1090	2.50306	1.59263	4.21183	3.71254	2.324	1.23688	3.8858	10.5632	1.93721	1.43206	3.81103	2.86881	up	0.409727	0.627913	0.740709	no	chr7	64068891	64069609	+
circRNA10900	13.9759	15.1742	17.1181	17.8727	14.3621	21.2417	14.8375	13.778	17.7952	15.6938	16.6693	15.7006	up	0.0863693	0.547667	0.678191	no	chr16	11886471	11898035	-
circRNA10901	2.09941	1.94109	1.61618	1.72081	2.20042	3.17711	1.45043	2.2633	1.6351	1.74163	2.05352	1.91558	up	0.100312	0.693858	0.793133	no	chr16	13934192	13935743	+
circRNA10902	8.09188	8.13762	10.2519	8.32075	11.2098	12.0348	9.03423	9.87884	10.5274	11.5903	10.6131	9.20238	up	0.20577	0.134631	0.265215	no	chr16	14593301	14610809	-
circRNA10903	4.09531	4.73869	5.09885	3.99398	4.74002	4.58261	4.65875	3.74447	3.01325	4.23444	4.0467	4.53337	down	-0.163837	0.229663	0.37804	no	chr16	18828031	18830369	-
circRNA10904	9.90247	14.2665	17.1491	7.1878	6.76605	6.30896	5.836	6.4805	4.11231	5.71592	5.69074	11.0544	down	-0.957931	0.0558525	0.155941	no	chr16	19173430	19224838	+
circRNA10905	10.2202	9.40576	10.5776	9.53271	9.78282	13.2713	11.3547	12.3583	7.64407	10.5396	11.0336	9.90381	up	0.155846	0.311416	0.463617	no	chr16	19608178	19627805	+
circRNA10906	4.18749	4.38292	5.03263	3.94008	4.43261	5.84172	5.51598	6.06354	3.94117	5.09074	5.29063	4.39515	up	0.267528	0.0769345	0.187036	no	chr16	19644886	19669299	+
circRNA10907	3.92483	4.15389	3.62513	3.04983	2.85105	2.65475	2.67109	2.30091	3.8854	2.45893	2.79421	3.52095	down	-0.33352	0.0897941	0.204542	no	chr16	19733698	19735450	+
circRNA10908	25.0379	23.3577	31.7262	31.9768	25.4831	30.3002	35.6676	29.0017	20.9526	28.0942	28.8033	27.5164	up	0.0659428	0.677271	0.78125	no	chr16	21612645	21625115	+
circRNA10909	50.0002	60.228	67.8896	60.5219	40.9361	60.2225	43.3323	48.4948	52.634	32.1709	47.3709	55.9152	down	-0.239238	0.234698	0.383368	no	chr16	21957235	21965505	+
circRNA1091	4.95635	5.67753	4.88476	4.81753	5.44859	4.28606	4.80661	4.46424	6.37071	3.84695	4.75491	5.15695	down	-0.117101	0.425347	0.570931	no	chr7	65757983	65760556	+
circRNA10910	7.45164	6.67203	5.86345	6.49137	9.82086	7.3075	6.90981	8.02697	5.43673	6.90693	6.91759	7.25987	down	-0.0696744	0.685229	0.787202	no	chr16	23079946	23082557	-
circRNA10911	6.56298	6.4628	9.56631	9.07781	45.0411	43.5186	53.8119	18.615	8.91137	43.9412	33.7596	15.3422	up	1.13779	0.142743	0.275635	no	chr16	23988508	24035547	+
circRNA10912	14.5019	19.2341	17.7519	15.8352	16.9454	17.4667	15.0794	18.3323	15.4594	15.036	16.2748	16.8537	down	-0.0504283	0.599148	0.719061	no	chr16	24776933	24791817	+
circRNA10913	1.36009	0.941115	1.18091	0.700743	1.21853	1.14255	0.885276	1.14293	0.383743	0.622513	0.835403	1.08028	down	-0.370859	0.232395	0.380741	no	chr16	25246707	25247390	-
circRNA10914	0.643294	1.48863	1.14538	0.900055	1.42096	0.878254	0.646031	0.773305	0.432426	0.569997	0.660003	1.11966	down	-0.762522	0.0416474	0.135053	no	chr16	29364684	29365059	+
circRNA10915	9.77208	10.5719	7.29123	9.45403	10.3285	11.5542	6.50416	7.10973	5.89236	9.11749	8.03558	9.48354	down	-0.239024	0.265805	0.416283	no	chr16	30664215	30666541	+
circRNA10916	26.9504	14.6665	11.5373	37.3614	12.3801	11.1428	6.0838	13.9717	2.30998	3.40551	7.38277	20.5791	down	-1.47895	0.0571329	0.158005	no	chr16	46897648	46922416	+
circRNA10917	2.91997	2.77641	4.7152	3.39161	4.97386	8.05679	5.06606	5.77979	4.30293	5.99908	5.84093	3.75541	up	0.637227	0.0302308	0.115403	no	chr16	50068780	50084651	+
circRNA10918	1.16236	1.70368	2.39084	1.83744	2.49378	3.45396	2.38526	2.68138	2.28153	3.19919	2.80026	1.91762	up	0.546247	0.0293976	0.113871	no	chr16	50078741	50086351	+
circRNA10919	3.89179	2.07452	4.27642	2.64699	3.66173	6.69513	3.8866	5.89626	3.33892	6.63239	5.28986	3.31029	up	0.676273	0.0485075	0.145406	no	chr16	50100230	50102435	+
circRNA1092	10.797	8.58425	10.9185	9.79303	10.1768	10.5308	8.09752	11.2438	13.1461	12.7878	11.1612	10.0539	up	0.15074	0.312134	0.464121	no	chr7	66127704	66134374	+
circRNA10920	6.06255	7.69946	7.38524	7.4438	7.75563	7.0493	8.49405	6.92415	9.00442	8.90395	8.07518	7.26934	up	0.15167	0.185058	0.327517	no	chr16	53235185	53250066	+
circRNA10921	1.38406	1.64694	2.1293	1.66637	2.13284	2.04877	2.35679	1.83853	2.51769	1.902	2.13276	1.7919	up	0.251227	0.122784	0.249841	no	chr16	53273626	53274302	+
circRNA10922	3.3791	3.77615	4.3333	3.43471	3.68875	3.80664	3.75685	3.07457	4.16562	3.38097	3.63693	3.7224	down	-0.0335126	0.744468	0.829889	no	chr16	53296956	53306397	+
circRNA10923	1.48954	1.56894	1.81339	1.82715	1.50959	1.54714	1.70915	1.23451	1.49448	1.26145	1.44935	1.64172	down	-0.17981	0.137908	0.269524	no	chr16	53306237	53308854	+
circRNA10924	3.82793	4.23672	4.37258	3.93666	4.45201	4.54913	5.32699	5.10395	4.78657	5.04711	4.96275	4.16518	up	0.25276	0.00235301	0.0452184	no	chr16	53442658	53454842	+
circRNA10925	4.72148	6.02028	5.74921	5.18895	6.59824	6.62617	7.53128	7.26985	7.30991	7.16138	7.17972	5.65563	up	0.344239	0.00620084	0.0581801	no	chr16	53442658	53461850	+
circRNA10926	11.1417	13.41	16.6465	13.797	11.0675	10.013	6.88086	6.10864	7.93327	5.53539	7.29424	13.2125	down	-0.857079	0.00214901	0.0451812	no	chr16	56401733	56414344	-
circRNA10927	48.6537	35.4257	32.6238	49.3879	28.6095	54.3151	24.7484	31.7591	20.5499	23.176	30.9097	38.9401	down	-0.333198	0.317434	0.469288	no	chr16	57650253	57651622	+
circRNA10928	1.37525	1.52663	1.58073	1.88153	1.76115	2.60012	2.51484	1.84319	1.57678	2.05525	2.11804	1.62506	up	0.382236	0.0644374	0.169179	no	chr16	68174374	68191775	+
circRNA10929	6.55562	6.86823	8.42365	8.30436	6.61261	8.03974	8.04313	8.21068	8.33738	8.68783	8.26375	7.3529	up	0.168484	0.0936838	0.210194	no	chr16	68557998	68558568	+
circRNA1093	17.6884	18.1152	20.0614	20.2778	17.7938	7.70864	10.6271	10.968	24.481	12.416	13.2401	18.7873	down	-0.504842	0.129842	0.259286	no	chr7	66240325	66286709	+
circRNA10930	1.50809	2.49261	1.43481	2.89288	2.3611	2.75188	2.45049	2.46767	1.80739	2.83411	2.46231	2.1379	up	0.203818	0.370564	0.519888	no	chr16	68900434	68907575	+
circRNA10931	7.38335	6.81596	6.45173	7.40585	8.16512	11.7762	9.06288	6.6823	4.96888	7.06859	7.91177	7.2444	up	0.127135	0.604903	0.723729	no	chr16	69260050	69270285	+
circRNA10932	9.9117	11.3375	14.6938	10.097	13.8157	8.47683	7.57096	7.76613	9.46329	9.40902	8.53725	11.9711	down	-0.487718	0.0205443	0.0953972	no	chr16	69653236	69670288	+
circRNA10933	3.46775	6.35292	10.1109	4.59843	6.35004	4.17631	2.72414	4.40545	7.32847	4.95893	4.71866	6.17601	down	-0.388298	0.317294	0.469147	no	chr16	69695136	69695379	+
circRNA10934	12.6859	13.5093	13.5528	15.3789	15.5998	14.6701	10.2094	8.76454	10.5419	20.4978	12.9367	14.1454	down	-0.128854	0.60935	0.727135	no	chr16	69982350	69986509	-
circRNA10935	3.80095	5.3503	4.68533	4.54762	3.44503	5.64292	4.09254	4.76672	3.82784	3.44897	4.3558	4.36585	down	-0.00332416	0.984867	0.990816	no	chr16	70258980	70262524	-
circRNA10936	7.24671	9.70167	9.14939	7.88008	11.584	14.7342	12.1288	11.0745	12.2556	11.1587	12.2704	9.11237	up	0.42928	0.0140903	0.079913	no	chr16	70541669	70548442	+
circRNA10937	2.64896	2.25353	2.14113	2.43268	2.15553	1.76515	2.05791	1.22487	1.45253	1.85519	1.67113	2.32636	down	-0.477252	0.00783591	0.0627936	no	chr16	71652790	71658815	-
circRNA10938	1.45008	1.69307	1.79108	1.55358	1.89097	1.4877	1.39766	1.10304	1.32765	1.34694	1.3326	1.67576	down	-0.330572	0.0104103	0.0705299	no	chr16	71658233	71681905	-
circRNA10939	1.23523	1.64156	1.78248	1.4388	1.96308	1.42513	1.3187	1.0673	1.34067	1.24104	1.27857	1.61223	down	-0.334528	0.0580437	0.159079	no	chr16	71658233	71676649	-
circRNA1094	8.16521	6.36012	8.47899	5.41065	5.70648	5.06566	6.88171	9.07628	6.94466	8.17161	7.22798	6.82429	up	0.0829141	0.674734	0.779144	no	chr7	66427949	66439304	-
circRNA10940	1.53184	1.43559	1.56029	1.40706	1.49879	1.35383	1.27949	1.03796	1.05652	1.22986	1.19153	1.48671	down	-0.319312	0.00582925	0.0567948	no	chr16	71676447	71681905	-
circRNA10941	15.6121	21.3171	18.0069	15.6719	11.0431	17.7446	10.1167	8.34895	11.14	10.5526	11.5806	16.3302	down	-0.495837	0.075742	0.18558	no	chr16	71738942	71739341	-
circRNA10942	7.06496	9.86089	10.7308	9.36803	6.19685	12.1905	8.46942	7.06793	8.3056	7.75883	8.75846	8.64431	up	0.0189266	0.928935	0.954141	no	chr16	71745144	71745614	-
circRNA10943	19.8201	21.7131	20.7523	15.4765	20.7238	17.5891	21.7024	23.3491	28.5064	17.5921	21.7478	19.6972	up	0.142883	0.4084	0.556305	no	chr16	72793255	72950965	-
circRNA10944	11.9819	10.8572	13.2149	11.4641	9.93541	14.4019	14.8121	12.7439	12.8678	9.88481	12.9421	11.4907	up	0.171606	0.201512	0.346391	no	chr16	74457874	74467848	-
circRNA10945	7.87558	10.1121	9.60109	9.1585	9.4983	10.6414	8.39079	11.277	9.07339	9.77761	9.83203	9.24912	up	0.0881734	0.392413	0.541099	no	chr16	74885653	74886396	-
circRNA10946	7.83437	7.22335	6.57657	6.28854	7.42099	6.92056	6.814	8.065	7.33107	7.95096	7.41632	7.06876	up	0.0692447	0.388869	0.537421	no	chr16	74915870	74942826	-
circRNA10947	2.56674	4.58078	3.74457	3.31944	2.70579	4.61188	4.33513	4.79444	3.75676	3.86052	4.27174	3.38346	up	0.336324	0.0768169	0.186842	no	chr16	75411825	75414695	-
circRNA10948	0.498822	0.119021	0.335742	0.311517	0.210083	2.03356	0.447835	3.53911	0.117283	1.21766	1.47109	0.295037	up	2.31792	0.12791	0.256714	no	chr16	77353733	77367723	-
circRNA10949	17.6665	19.565	12.4787	18.1556	13.2024	7.27029	7.36624	7.76643	6.82241	8.54523	7.55412	16.2136	down	-1.10187	0.00301344	0.047871	yes	chr16	81854444	81870935	+
circRNA1095	11.6081	12.3743	11.205	10.479	9.46554	11.4919	7.95935	11.6024	10.115	11.7051	10.5747	11.0264	down	-0.0603374	0.619531	0.734881	no	chr7	66797374	66805396	+
circRNA10950	16.5985	18.2817	11.6564	24.0463	13.8633	6.71798	6.93191	7.04077	5.1676	7.96532	6.76471	16.8892	down	-1.32	0.00767935	0.0625143	yes	chr16	81895807	81905507	+
circRNA10951	10.0274	8.76323	7.89951	10.62	12.5765	13.5117	11.0482	7.95642	11.929	10.4326	10.9756	9.97733	up	0.137571	0.436927	0.581154	no	chr16	88598178	88609051	+
circRNA10952	2.62539	2.42959	2.45035	2.30072	2.97471	2.41683	1.90948	1.44156	1.41146	1.98487	1.83284	2.55615	down	-0.479888	0.0143656	0.0808313	no	chr16	89100662	89102759	+
circRNA10953	55.1786	48.0173	48.4785	52.4548	57.9304	64.0971	57.3546	61.3244	56.8565	61.9552	60.3176	52.4119	up	0.202683	0.0115429	0.0734137	no	chr16	89531904	89544772	+
circRNA10954	19.531	20.1679	19.6301	19.1332	20.9054	22.0087	22.7175	23.1802	21.8694	19.0206	21.7593	19.8735	up	0.130783	0.0583347	0.159471	no	chr16	89544648	89550609	+
circRNA10955	18.8078	18.0687	19.7124	12.9102	21.5015	11.0205	13.6303	19.4848	13.4933	18.6835	15.2625	18.2001	down	-0.253958	0.214895	0.361983	no	chr15	22572929	22579723	+
circRNA10956	1.44006	2.00775	1.74652	1.63551	1.88396	0.96564	1.45242	1.25628	0.647765	1.02638	1.0697	1.74276	down	-0.704171	0.00477766	0.0537971	no	chr15	23289303	23293667	-
circRNA10957	56.9209	68.5305	59.4865	52.7384	37.9377	21.9978	25.8792	23.0248	37.5834	21.4942	25.9959	55.1228	down	-1.08437	0.0019466	0.0438843	yes	chr15	24975358	24977029	+
circRNA10958	8.06559	9.0831	10.8963	7.10877	6.06799	2.95931	4.03071	4.23816	6.10991	3.81425	4.23047	8.24434	down	-0.962587	0.00501168	0.0546139	no	chr15	25082589	25111894	+
circRNA10959	8.82979	10.1432	9.52838	11.0061	11.4596	11.9358	12.1032	11.4188	11.1645	11.5012	11.6247	10.1934	up	0.189556	0.0370344	0.127259	no	chr15	25360383	25371812	-
circRNA1096	3.40598	4.50349	3.54948	2.56048	2.4275	4.66081	6.52883	4.6251	7.07668	8.54142	6.28657	3.28938	up	0.934455	0.0119333	0.074098	no	chr7	70762870	70771644	+
circRNA10960	8.45779	10.1328	10.2051	10.9837	11.3328	11.3403	11.4762	10.8324	11.8945	10.6979	11.2483	10.2224	up	0.137964	0.112082	0.235142	no	chr15	25370566	25411971	-
circRNA10961	6.80073	7.08687	7.17843	7.09781	7.80647	4.77393	6.66551	6.19848	7.35391	5.96418	6.1912	7.19406	down	-0.216587	0.0780091	0.188723	no	chr15	28245881	28263169	-
circRNA10962	8.97282	10.1367	7.45523	7.13336	8.92665	2.86253	5.86722	5.71732	11.1328	3.95354	5.90668	8.52495	down	-0.529344	0.144584	0.278109	no	chr15	29708559	29711000	-
circRNA10963	32.2608	27.7209	24.7826	31.4591	35.2447	14.2835	29.1223	26.7881	33.3667	19.2481	24.5617	30.2936	down	-0.302601	0.191159	0.334532	no	chr15	29732433	29762438	-
circRNA10964	8.11989	5.60498	6.90047	10.1111	8.37472	2.36083	5.9755	7.68554	8.74045	4.10582	5.77363	7.82222	down	-0.4381	0.183228	0.325356	no	chr15	29741331	29742781	-
circRNA10965	6.82495	5.77002	4.86549	6.64211	8.04084	2.405	4.54556	5.54391	8.02196	2.89007	4.6813	6.42868	down	-0.457613	0.175614	0.316534	no	chr15	29761139	29762438	-
circRNA10966	4.95836	6.64392	7.07085	4.76793	5.72676	2.94347	2.61403	5.21005	5.03773	2.99492	3.76004	5.83356	down	-0.63363	0.0216303	0.097858	no	chr15	30910614	30914091	+
circRNA10967	27.2955	34.8626	49.4456	20.1489	26.6046	18.4349	14.5728	20.5207	24.9946	16.5549	19.0156	31.6715	down	-0.736	0.0635188	0.167762	no	chr15	30954763	30974456	-
circRNA10968	4.12384	5.06796	6.12015	5.68642	6.33984	5.98893	7.18603	7.26006	7.98457	4.66214	6.61635	5.46764	up	0.275115	0.148246	0.282749	no	chr15	34932318	34938813	-
circRNA10969	1.772	3.46701	3.50649	2.8219	5.08838	5.07868	7.47714	7.01436	7.53069	4.54186	6.32854	3.33116	up	0.925851	0.00720507	0.0613035	no	chr15	38299373	38299547	+
circRNA1097	3.03492	2.31989	2.67415	2.60799	1.81045	2.64565	2.60235	2.42795	2.94918	2.72006	2.66904	2.48948	up	0.100475	0.451833	0.594788	no	chr7	72831602	72833928	+
circRNA10970	4.53069	5.40639	6.16714	5.66887	6.44498	9.69111	10.8397	5.2583	8.72895	14.7485	9.85331	5.64362	up	0.803988	0.050613	0.148347	no	chr15	38502312	38508001	-
circRNA10971	1.40859	1.33043	1.2344	1.31159	1.65951	0.944022	1.90324	1.19518	1.12439	1.66416	1.3662	1.3889	down	-0.0237805	0.91098	0.9427	no	chr15	39713444	39741900	-
circRNA10972	6.17173	10.1184	10.1951	7.69674	10.371	10.6414	9.1909	8.32291	9.78233	8.45128	9.27776	8.91061	up	0.0582527	0.711687	0.806077	no	chr15	40985338	40987974	-
circRNA10973	1.22832	2.32063	1.96386	1.07283	2.04807	1.41047	2.03154	1.96117	2.53831	2.48728	2.08575	1.72674	up	0.272516	0.293241	0.44512	no	chr15	41073428	41074565	-
circRNA10974	2.03376	2.62171	2.59811	2.23493	3.41142	2.77303	2.45721	2.35458	2.27202	3.01481	2.57433	2.57999	down	-0.00316641	0.98413	0.990266	no	chr15	41696075	41713496	+
circRNA10975	1.61021	1.51139	1.4883	1.43353	1.67754	1.6793	2.02091	2.11457	1.52567	1.8075	1.82959	1.54419	up	0.244667	0.0553958	0.155235	no	chr15	42810614	42817097	-
circRNA10976	10.1909	10.439	10.4127	8.90506	14.0506	14.3021	14.949	17.8254	11.5493	14.5391	14.633	10.7997	up	0.438239	0.0200725	0.0943788	no	chr15	42829938	42878684	-
circRNA10977	6.71036	5.69194	7.30186	5.40504	6.63816	6.79868	8.68533	7.85563	8.20966	7.74054	7.85797	6.34947	up	0.30752	0.0124491	0.0753459	no	chr15	42950262	42970607	-
circRNA10978	2.30072	2.42746	3.43133	2.56073	3.12133	2.41314	3.26898	3.18469	3.50115	3.20606	3.1148	2.76831	up	0.170134	0.259105	0.409144	no	chr15	43002555	43022801	-
circRNA10979	2.65605	3.30046	3.19603	2.49519	3.13941	3.92203	3.72263	3.72263	4.16999	3.83071	3.8736	2.95743	up	0.389331	0.00225442	0.0452184	no	chr15	43148755	43160794	+
circRNA1098	12.3247	14.4293	13.838	14.3979	11.9218	14.4615	13.2741	21.771	15.056	17.7203	16.4566	13.3823	up	0.298335	0.114003	0.237498	no	chr7	72926262	72930111	+
circRNA10980	8.67544	6.96236	7.86466	7.43035	5.97492	4.50486	5.20611	5.94432	6.6554	5.07608	5.47735	7.38155	down	-0.430444	0.0121936	0.074659	no	chr15	43446387	43447485	-
circRNA10981	8.24736	9.3064	9.9129	8.01275	10.0306	7.7666	9.12852	10.2802	12.1943	9.51793	9.77751	9.102	up	0.103283	0.450164	0.593041	no	chr15	44328685	44338317	+
circRNA10982	7.39556	8.07176	9.52174	6.01686	7.83021	10.4637	7.9696	7.19766	7.39657	7.86643	8.1788	7.76723	up	0.07449	0.62757	0.740519	no	chr15	44569398	44570658	-
circRNA10983	3.27991	3.57331	4.0637	3.40688	4.06286	4.966	4.55565	4.56602	4.63958	5.17068	4.77959	3.67733	up	0.378227	0.000862565	0.0390989	no	chr15	44592331	44610985	-
circRNA10984	1.90402	3.11653	2.74505	2.8716	4.77637	3.3589	2.45299	3.36003	4.59612	2.86713	3.32703	3.08271	up	0.110036	0.69131	0.791418	no	chr15	45175219	45178306	-
circRNA10985	4.70544	6.17419	6.76173	3.48568	2.41384	0.334008	0.558356	0.638055	2.18858	0.567962	0.857391	4.70818	down	-2.45714	0.00607727	0.0576106	yes	chr2	164692221	164695836	-
circRNA10986	13.1425	13.2929	11.672	15.2862	5.6566	4.4907	2.40734	1.32547	1.90614	2.8539	2.59671	11.81	down	-2.18526	0.00341217	0.0490279	yes	chr15	57437985	57461892	+
circRNA10987	14.7162	19.2262	18.7836	11.7981	8.22101	1.48293	2.81772	1.16137	5.14189	1.12631	2.34604	14.549	down	-2.63262	0.00267254	0.0466751	yes	chr4	90308244	90313047	+
circRNA10988	2.4805	2.42368	2.71895	2.24372	2.12695	2.52631	2.55997	3.39328	2.36386	3.62049	2.89278	2.39876	up	0.270168	0.12967	0.259042	no	chr15	48741601	48769081	-
circRNA10989	12.7838	14.6547	18.156	11.4114	22.977	16.8093	14.7733	17.9702	17.0809	15.8407	16.4949	15.9966	up	0.044253	0.826865	0.888258	no	chr15	49625113	49634794	+
circRNA1099	2.6451	3.08446	3.1779	2.53826	2.64546	2.37665	3.45471	3.96143	4.07029	3.15215	3.40305	2.81824	up	0.272033	0.134849	0.26539	no	chr7	74356410	74357477	+
circRNA10990	9.64001	7.72901	9.18722	10.9079	8.80217	9.42009	12.4276	11.6745	11.7676	11.4872	11.3554	9.25325	up	0.295347	0.0202974	0.0949386	no	chr15	50459000	50465191	+
circRNA10991	4.42835	5.78438	5.9844	5.9231	6.71264	6.44196	6.22724	6.77154	7.28084	6.57041	6.6584	5.76657	up	0.207461	0.0756004	0.185402	no	chr15	50471633	50477499	+
circRNA10992	3.61463	3.98104	5.05918	2.61809	3.0663	0.749524	2.03003	2.31072	0.871764	2.10843	1.61409	3.66785	down	-1.18421	0.00539672	0.0554125	yes	chr15	50529797	50538851	-
circRNA10993	5.06417	6.5465	4.74735	6.05904	4.14534	3.1325	3.38604	4.0559	3.02437	3.94832	3.50943	5.31248	down	-0.59815	0.0106666	0.0710266	no	chr15	50631417	50648885	-
circRNA10994	6.20458	8.23544	8.03935	6.08459	5.38405	9.19268	5.80927	6.1008	5.70481	4.60323	6.28216	6.7896	down	-0.112066	0.611847	0.729048	no	chr15	50747495	50749746	-
circRNA10995	5.21571	6.13684	5.72572	7.07993	5.438	16.0258	8.70378	11.037	3.85994	10.1655	9.95841	5.91924	up	0.750504	0.108086	0.229886	no	chr15	51498552	51503033	-
circRNA10996	3.37388	3.12905	3.3832	4.08435	3.56713	10.6402	5.92827	6.55446	2.3133	7.23981	6.53522	3.50752	up	0.897783	0.0852825	0.198965	no	chr15	51507134	51547408	-
circRNA10997	24.6241	18.6793	19.699	42.8511	15.4116	4.8677	11.0823	0.288461	14.1847	11.1926	8.32317	24.253	down	-1.54296	0.0273284	0.109566	yes	chr15	53597079	53665768	-
circRNA10998	3.91825	4.03114	3.30364	7.86263	2.46975	0.806975	1.71507	0	2.46442	1.40122	1.27754	4.31709	down	-1.75669	0.0268995	0.108895	yes	chr15	53665572	53665768	-
circRNA10999	31.1534	31.772	40.4739	29.9246	29.3769	29.3696	22.5225	22.5958	29.4235	24.7988	25.742	32.5401	down	-0.338094	0.0303699	0.115806	no	chr15	55365188	55432602	-
circRNA11	0.712541	0.742015	0.713829	0.867934	0.711119	0.782002	1.17436	1.75408	4.2146	0.734067	1.73182	0.749488	up	1.20831	0.203669	0.348803	no	chrX	10566888	10567603	-
circRNA110	6.77138	7.2051	7.83944	7.37176	5.17427	4.2659	5.99341	6.00732	9.14272	4.90388	6.06265	6.87239	down	-0.180865	0.428236	0.573626	no	chr13	100257595	100273346	+
circRNA1100	3.00256	2.42526	2.40027	3.75216	2.59884	3.06472	2.00683	3.5812	2.85569	2.24727	2.75114	2.83582	down	-0.0437357	0.829315	0.889651	no	chr7	75057529	75058769	-
circRNA11000	1.21555	2.71975	2.82102	1.44271	2.34996	0.913343	1.06524	1.1545	1.94904	1.55533	1.32749	2.1098	down	-0.668404	0.0826451	0.19542	no	chr15	55434905	55450367	-
circRNA11001	0.888965	0.371193	2.26171	2.40456	1.35803	0.0768743	0.977673	0.275222	4.77337	0.142408	1.24911	1.45689	down	-0.221994	0.839313	0.895623	no	chr15	55637170	55638676	-
circRNA11002	0.808247	1.11316	1.51344	1.24951	1.34525	1.07306	1.78882	1.71223	3.05671	1.1297	1.7521	1.20592	up	0.538953	0.208084	0.354284	no	chr15	56391243	56394834	+
circRNA11003	22.0916	25.7768	34.8054	24.8909	38.5404	31.2719	39.1722	37.5599	46.9758	49.1542	40.8268	29.221	up	0.482509	0.0337182	0.121722	no	chr15	58665097	58682314	-
circRNA11004	3.75588	8.95936	5.96522	4.5468	4.27424	3.148	3.24553	4.1742	6.24104	6.98866	4.75949	5.5003	down	-0.208704	0.562728	0.689419	no	chr15	58886975	58887540	-
circRNA11005	4.5628	5.45543	5.69839	5.80255	6.77892	7.17946	7.34381	7.27256	6.21537	7.93108	7.18846	5.65962	up	0.344978	0.010241	0.0700649	no	chr15	59030804	59084254	+
circRNA11006	9.0997	7.87715	4.55949	6.10355	7.79194	6.0315	7.19395	8.58962	11.753	5.05893	7.72539	7.08637	up	0.124563	0.664023	0.77015	no	chr15	59153590	59214720	-
circRNA11007	3.36272	3.10818	1.83066	2.14828	3.17408	2.55042	2.82245	3.31133	4.37655	2.12952	3.03806	2.72478	up	0.157006	0.543857	0.674918	no	chr15	59171897	59178537	-
circRNA11008	14.5346	13.2578	13.0565	12.5237	15.2445	19.3717	20.6621	18.2019	17.0659	15.7512	18.2105	13.7234	up	0.408134	0.00337027	0.0489219	no	chr15	59668892	59678087	-
circRNA11009	7.23696	7.40456	7.9111	8.16524	8.7574	8.58975	8.28569	8.60335	11.2811	9.07972	9.16793	7.89505	up	0.215647	0.0820309	0.194497	no	chr15	63529014	63537156	+
circRNA1101	6.39891	6.76438	6.58387	7.15545	4.52217	7.62424	7.41501	15.2223	8.44674	6.86474	9.11461	6.28496	up	0.536279	0.143796	0.27697	no	chr7	75474704	75475188	-
circRNA11010	4.10361	4.91172	4.68943	4.77022	6.25804	4.47186	7.26308	5.59594	5.26136	6.28427	5.7753	4.9466	up	0.223458	0.20155	0.346427	no	chr15	63698728	63716473	-
circRNA11011	3.35318	2.85719	3.64296	4.85453	3.85777	5.63437	5.02083	4.72648	5.72073	5.12779	5.24604	3.71313	up	0.498594	0.00616005	0.0579182	no	chr15	64118117	64118854	+
circRNA11012	4.88117	4.78672	5.51524	4.42819	5.48046	4.47816	5.8008	6.93544	7.15335	6.0951	6.09257	5.01836	up	0.279836	0.0886379	0.202947	no	chr15	64203082	64216713	-
circRNA11013	15.2123	16.8535	17.128	15.5134	14.4489	22.7604	20.1166	20.9865	17.5638	17.8388	19.8532	15.8312	up	0.326599	0.0106482	0.0710266	no	chr15	64965320	64974747	-
circRNA11014	2.3774	2.85695	2.74707	2.55216	3.28134	2.85704	4.25074	3.20946	3.16084	3.32368	3.36035	2.76299	up	0.282384	0.0719306	0.180189	no	chr15	65463761	65485160	-
circRNA11015	2.19187	2.67338	2.56731	2.46238	3.05361	2.56226	3.8669	3.04516	2.82765	3.13302	3.087	2.58971	up	0.253415	0.0983622	0.216069	no	chr15	65463761	65480399	-
circRNA11016	3.54266	4.4481	4.29466	3.77837	4.97105	4.37782	5.59555	4.75109	5.02593	5.37546	5.02517	4.20697	up	0.256391	0.0401165	0.132261	no	chr15	65474209	65500779	-
circRNA11017	3.82769	5.14043	5.32519	4.99518	5.18111	4.85163	6.97308	5.05486	4.90712	5.36184	5.4297	4.89392	up	0.149883	0.300887	0.453224	no	chr15	65497864	65507355	-
circRNA11018	4.11771	6.56357	5.37466	5.45143	6.51923	5.21122	6.47853	5.96415	5.85336	6.80019	6.06149	5.60532	up	0.112876	0.416416	0.563083	no	chr15	65507243	65512564	-
circRNA11019	1.53859	1.42545	1.35658	1.36346	1.61209	2.76893	2.04827	1.94101	2.34181	2.04409	2.22882	1.45924	up	0.611068	0.00500802	0.0546139	no	chr15	65690415	65691511	-
circRNA1102	25.3583	24.3738	23.2216	17.2997	23.1168	48.5399	43.87	36.3025	19.5198	46.0592	38.8583	22.674	up	0.777182	0.0345276	0.122902	no	chr7	77374070	77387448	-
circRNA11020	1.68915	1.33071	1.5189	1.62185	1.64933	3.05879	3.25054	3.09875	3.77381	2.71252	3.17888	1.56199	up	1.02513	0.000293118	0.0346622	yes	chr15	65696366	65697383	-
circRNA11021	3.11754	2.84912	2.9145	3.06832	3.51261	5.87117	5.42963	4.57432	4.70202	4.26711	4.96885	3.09242	up	0.684177	0.00172082	0.0431772	no	chr15	65696366	65756472	-
circRNA11022	3.38057	2.51067	2.18524	3.03941	2.96188	4.89367	4.37729	4.10819	4.69718	3.36879	4.28902	2.81555	up	0.607231	0.00279449	0.0470826	no	chr15	65756140	65761438	-
circRNA11023	7.19045	8.26378	8.27941	6.81745	6.95574	7.08381	8.26171	7.55354	8.16508	7.68977	7.75078	7.50137	up	0.0471883	0.538078	0.669962	no	chr15	66294988	66329399	+
circRNA11024	2.30059	1.61248	2.03235	1.81837	1.40052	2.84209	2.00089	2.44839	2.70459	2.50083	2.49936	1.83286	up	0.447459	0.0140944	0.0799141	no	chr15	66532247	66546705	+
circRNA11025	17.4739	11.9208	11.3056	11.7003	15.039	15.1108	14.1135	18.4774	20.6582	10.2901	15.73	13.4879	up	0.221852	0.333474	0.484706	no	chr15	67769602	67772752	+
circRNA11026	18.9534	22.0968	23.9468	20.0147	27.1438	28.3288	30.6071	28.5304	29.9058	36.0638	30.6872	22.4311	up	0.452135	0.00359132	0.0495831	no	chr15	68145816	68173892	+
circRNA11027	14.5477	18.8805	21.7167	13.76	12.2564	0.834316	0.871592	2.27757	6.74859	0.463665	2.23915	16.2323	down	-2.85784	0.000304741	0.0346622	yes	chr15	71242649	71256715	+
circRNA11028	3.62983	5.19547	6.78404	3.09316	3.32166	2.79708	3.62596	4.08319	6.46895	4.37851	4.27074	4.40483	down	-0.0446019	0.888817	0.928052	no	chr15	71878040	71904039	-
circRNA11029	4.89799	7.14874	9.41857	4.15914	4.87735	3.8586	5.17736	5.44537	8.97061	6.14026	5.91844	6.10036	down	-0.0436769	0.891268	0.929809	no	chr15	71888004	71916492	-
circRNA1103	5.38961	5.06241	6.32213	7.30675	10.2698	10.1907	16.2425	16.0874	16.0727	13.0844	14.3356	6.87015	up	1.06119	0.00136077	0.0427235	yes	chr7	77581427	77600806	+
circRNA11030	15.9828	19.7574	27.3266	12.3059	15.3245	11.6855	17.5309	17.2886	26.2158	20.397	18.6236	18.1394	up	0.0380005	0.893541	0.931483	no	chr15	71904926	72021017	-
circRNA11031	31.825	35.4791	48.3853	24.4894	25.0478	22.9648	30.3769	30.7676	48.2534	31.9566	32.8639	33.0453	down	-0.0079435	0.976716	0.985057	no	chr15	71916370	71938927	-
circRNA11032	10.0145	12.155	16.6132	7.71118	9.40368	7.21377	10.8806	10.6675	15.8717	12.5861	11.4439	11.1795	up	0.0337248	0.902122	0.937048	no	chr15	71916370	72046634	-
circRNA11033	3.78484	5.30297	7.50184	2.88352	4.22011	2.7245	4.55652	4.72183	6.44711	5.05484	4.70096	4.73865	down	-0.0115217	0.970687	0.981578	no	chr15	71959901	72010447	-
circRNA11034	4.81807	6.22477	8.74294	3.56418	5.01768	3.329	5.65446	5.61202	7.96006	6.09674	5.73046	5.67353	up	0.0144037	0.961606	0.975647	no	chr15	71959901	72032588	-
circRNA11035	3.98171	5.10901	6.94673	2.97077	4.14939	2.67468	4.3925	4.32781	6.3294	4.90066	4.52501	4.63152	down	-0.0335653	0.907847	0.940835	no	chr15	71959901	72046634	-
circRNA11036	1.74221	1.86268	3.05664	1.40317	1.64543	1.20045	1.74643	2.19112	2.97637	2.06887	2.03665	1.94203	up	0.0686344	0.823179	0.885212	no	chr15	71991103	71999940	-
circRNA11037	7.79787	8.07466	7.95229	8.86401	8.25208	8.46966	9.87333	7.95633	8.7395	8.57303	8.72237	8.18818	up	0.0911772	0.191417	0.334843	no	chr15	72563394	72572165	+
circRNA11038	8.61503	7.26144	7.4009	7.63283	7.57041	8.41713	9.04135	7.70318	9.30886	7.48751	8.3916	7.69612	up	0.124815	0.149863	0.284555	no	chr15	75384264	75396496	-
circRNA11039	2.01985	2.0592	1.72631	1.77283	1.99184	1.85643	1.93572	1.62801	1.87752	1.9491	1.84936	1.91401	down	-0.0495733	0.491886	0.630945	no	chr15	75400040	75413045	-
circRNA1104	5.35682	6.39322	7.25896	7.01973	9.28684	9.65242	16.6512	18.4514	16.5114	14.6247	15.1782	7.06311	up	1.10363	0.00344452	0.0491778	yes	chr7	77610765	77627675	+
circRNA11040	1.57187	1.95306	1.56208	1.21333	1.41724	1.42907	1.35615	1.2592	1.5516	1.41031	1.40127	1.54351	down	-0.139487	0.322801	0.474421	no	chr15	75407055	75413045	-
circRNA11041	3.83934	4.30866	4.3519	4.05871	4.6737	5.49488	6.75737	6.11633	8.24902	5.71159	6.46584	4.24646	up	0.606576	0.00899271	0.065879	no	chr15	75517259	75524298	-
circRNA11042	11.4706	10.1936	12.4926	10.5458	16.6282	13.4999	18.8883	13.4632	20.2682	16.8277	16.5895	12.2662	up	0.435585	0.0443887	0.139442	no	chr15	75859878	75891014	+
circRNA11043	12.0711	12.3087	13.7728	11.0588	12.2092	12.6279	13.5092	18.6217	14.7234	15.6698	15.0304	12.2841	up	0.291091	0.0550475	0.154806	no	chr15	76701758	76771954	-
circRNA11044	3.75619	3.8989	4.16775	3.41079	4.10364	3.61704	4.54772	6.11082	4.56403	4.63378	4.69468	3.86745	up	0.279642	0.108943	0.231137	no	chr15	76753808	76767088	-
circRNA11045	38.6556	42.5021	39.1246	41.1615	57.1963	66.8133	121.395	87.8	72.0386	83.0064	86.2106	43.728	up	0.979307	0.00857543	0.064249	no	chr15	77283883	77365225	-
circRNA11046	9.07885	10.0935	12.9015	11.6808	14.2582	14.2805	16.6135	18.0198	14.6547	14.2446	15.5626	11.6026	up	0.423639	0.0114809	0.0732104	no	chr15	78488647	78497311	+
circRNA11047	0.0679218	0.236343	0.144006	0.129904	0.100121	0.264313	0.165999	0.267236	0.149052	0.344556	0.238231	0.135659	up	0.812378	0.0575777	0.158567	no	chr15	79456098	79458445	+
circRNA11048	0	0.581952	0.422129	0.48959	0.240126	0.0860877	0.0782034	0.166946	0.245768	0	0.115401	0.346759	down	-1.58728	0.0894016	0.204025	no	chr15	82640657	82641682	-
circRNA11049	4.8521	4.7856	5.44731	5.87058	5.93134	3.41164	3.09769	19.138	13.0067	4.08134	8.54707	5.37739	up	0.668526	0.382019	0.530588	no	chr15	83858766	83870959	+
circRNA1105	5.77318	4.78576	4.27921	6.92996	4.86958	3.6535	0.921619	10.1768	5.01817	2.80306	4.51463	5.32754	down	-0.238862	0.640773	0.751049	no	chr7	80789306	80810701	-
circRNA11050	43.4526	36.2709	35.6247	37.0062	35.4741	47.8386	54.8655	49.8215	50.0128	41.44	48.7957	37.5657	up	0.377338	0.00364312	0.0498029	no	chr15	85097948	85117839	+
circRNA11051	13.769	12.7161	15.5626	19.3369	25.1068	29.6342	35.6293	31.4888	28.422	34.219	31.8787	17.2983	up	0.881962	0.00108043	0.0403015	no	chr15	85664563	85708086	+
circRNA11052	12.2071	11.8155	12.6971	14.1972	19.8623	26.5716	32.7111	27.253	24.1836	32.3609	28.616	14.1558	up	1.01543	0.000211436	0.0346622	yes	chr15	85710579	85719326	+
circRNA11053	3.62659	2.74853	2.89272	2.09657	3.55947	8.42231	6.1381	5.76621	5.15187	5.79767	6.25523	2.98477	up	1.06744	0.00217831	0.0452119	yes	chr15	90067110	90068595	+
circRNA11054	7.5457	7.76333	7.44742	7.78674	9.31272	12.3952	11.2027	10.0154	11.2459	10.536	11.0791	7.97118	up	0.474971	0.000393479	0.0365628	no	chr15	90441506	90449643	+
circRNA11055	9.35244	9.54248	10.1991	9.33627	12.0753	14.9256	15.4493	14.0037	16.1078	13.4924	14.7958	10.1011	up	0.550667	0.000160284	0.0316911	no	chr15	90441506	90467592	+
circRNA11056	4.9363	3.51698	5.36707	4.66859	5.88401	5.70157	4.68225	9.53831	5.2837	5.05982	6.05313	4.87459	up	0.312401	0.274285	0.424814	no	chr15	90638446	90641199	+
circRNA11057	11.3564	19.3735	19.5964	8.56207	18.4715	17.7832	25.757	11.6564	19.5954	15.5782	18.074	15.472	up	0.224261	0.450071	0.593031	no	chr15	92094881	92128489	+
circRNA11058	8.97692	10.2795	11.3475	12.1883	12.5607	12.8684	12.892	13.8583	12.1295	16.3987	13.6294	11.0706	up	0.299988	0.0329838	0.120597	no	chr15	92955423	93009323	+
circRNA11059	1.79486	2.1111	1.82443	1.43843	1.99436	2.24229	1.60668	2.14436	2.02997	3.45399	2.29546	1.83264	up	0.324863	0.218509	0.365939	no	chr15	93000512	93002317	+
circRNA1106	9.16145	8.1497	9.39689	10.0623	10.6195	5.4998	21.3646	5.6985	6.42821	3.81463	8.56116	9.47797	down	-0.146773	0.791829	0.864131	no	chr7	82032797	82066524	-
circRNA11060	38.3646	41.6324	51.2829	40.4938	52.2855	48.7771	66.8256	67.6047	59.2921	65.1428	61.5284	44.8119	up	0.457373	0.00664712	0.0598564	no	chr15	99632978	99706855	+
circRNA11061	5.75533	5.64605	6.16117	5.21212	5.8201	6.6176	8.50549	9.39325	6.7833	6.97288	7.65451	5.71895	up	0.420558	0.022002	0.0990017	no	chr15	99671323	99675458	+
circRNA11062	11.0519	10.0697	8.20003	9.21531	3.52461	2.36025	2.41711	4.89483	2.40813	4.81771	3.37961	8.4123	down	-1.31565	0.0144083	0.0809667	yes	chr15	100096356	100155320	-
circRNA11063	35.3464	35.4103	23.4926	28.8312	12.227	9.10566	7.39658	14.9098	7.78952	16.7089	11.1821	27.0615	down	-1.27505	0.0173867	0.0883333	yes	chr15	100152612	100331054	-
circRNA11064	9.29288	11.0874	6.91164	5.95948	6.2319	8.91342	5.72216	9.86239	8.24843	7.8334	8.11596	7.89665	up	0.0395209	0.860873	0.910278	no	chr14	24266430	24268619	-
circRNA11065	37.3546	53.3319	54.135	29.0311	47.1323	12.2382	31.6654	15.7079	30.0627	25.1313	22.9611	44.197	down	-0.944755	0.00961183	0.0681588	no	chr14	29624152	29725674	-
circRNA11066	0.874664	0.223191	0.721169	0.517784	0.468838	0.147073	0.190862	0.300882	0.199939	0.564359	0.280623	0.561129	down	-0.999699	0.0753614	0.185048	no	chr14	30877572	30880734	+
circRNA11067	9.03782	7.42144	10.3609	9.05554	10.9834	9.56529	11.0365	12.7335	10.0056	10.7111	10.8104	9.37183	up	0.206016	0.119171	0.244424	no	chr14	30902536	30913657	-
circRNA11068	17.2698	19.9965	24.753	22.98	25.003	25.4294	28.5921	30.7854	22.3722	22.9042	26.0166	22.0004	up	0.241902	0.105406	0.226172	no	chr14	30935163	30956242	-
circRNA11069	5.93875	6.23135	8.21644	6.47896	5.8038	6.59052	7.2129	9.04519	8.69345	5.87755	7.48392	6.53386	up	0.195858	0.242706	0.391938	no	chr14	31102916	31112543	-
circRNA1107	2.02137	2.4243	2.0616	1.65685	1.18476	0.245047	0.148403	1.16243	0.562251	0.582561	0.540138	1.86978	down	-1.79146	0.0013991	0.0429001	yes	chr7	83134250	83135656	-
circRNA11070	1.0293	0.997118	0.829021	0.801441	1.3248	0.831722	0.853559	0.763317	0.744364	0.895047	0.817602	0.996335	down	-0.285232	0.130243	0.259837	no	chr14	31345087	31347907	-
circRNA11071	6.49247	9.48227	8.439	10.1131	11.3234	9.26592	8.55632	7.22599	6.28683	5.53265	7.37355	9.17005	down	-0.314572	0.132697	0.262868	no	chr14	31380467	31383771	-
circRNA11072	1.47537	1.94731	2.04409	1.36885	1.1539	0.828121	1.34401	2.05487	1.01871	1.05727	1.2606	1.5979	down	-0.342075	0.256258	0.406066	no	chr14	32821402	32824815	+
circRNA11073	2.73748	2.13861	1.06093	0.940956	2.48502	5.42181	4.49747	2.15297	4.72348	13.5096	6.06106	1.8726	up	1.69453	0.0967723	0.213953	no	chr14	33774337	33778572	+
circRNA11074	1.99351	2.55886	2.56924	2.64265	2.43394	3.53294	4.1288	4.99082	3.59401	3.89753	4.02882	2.43964	up	0.72369	0.00196982	0.0440984	no	chr14	34608030	34609742	-
circRNA11075	5.69573	7.12337	9.31459	7.14948	7.16797	6.92417	7.78148	6.38908	8.49121	5.5539	7.02797	7.29023	down	-0.0528559	0.7438	0.829455	no	chr14	35775006	35775745	-
circRNA11076	1.21015	0.685771	1.00033	0.283405	0.375299	0.373746	0.441372	0.393058	0.711329	0.623121	0.508525	0.71099	down	-0.48351	0.333387	0.484682	no	chr14	37308056	37308519	+
circRNA11077	2.58787	2.64423	3.08647	2.62529	2.66521	2.60258	3.17914	3.52319	3.22277	2.9236	3.09026	2.72182	up	0.183158	0.0828689	0.195815	no	chr14	45008913	45054549	+
circRNA11078	2.0701	2.26521	2.5889	2.1181	2.21749	2.2642	2.59114	2.81871	2.60372	2.37783	2.53112	2.25196	up	0.168594	0.0686669	0.175137	no	chr14	45025783	45052562	+
circRNA11079	1.29239	2.00268	2.1842	1.54779	2.78253	5.3614	4.67015	4.34352	4.66921	5.49789	4.90844	1.96191	up	1.323	2.90156e-05	0.0243108	yes	chr14	45242034	45247377	-
circRNA1108	10.0455	10.0407	7.91182	17.614	12.6996	9.98057	13.6746	20.0992	6.09282	13.3673	12.6429	11.6623	up	0.116473	0.740936	0.827103	no	chr7	90747681	90790652	+
circRNA11080	2.74282	3.02917	3.72051	3.14255	3.31658	2.73642	3.34909	3.41504	3.32443	3.38885	3.24276	3.19033	up	0.0235207	0.806079	0.874542	no	chr14	50129961	50153173	-
circRNA11081	2.33259	2.41021	2.80582	2.62088	2.69839	2.01913	2.49943	2.7633	2.5687	2.46773	2.46366	2.57358	down	-0.0629736	0.489485	0.62888	no	chr14	50134123	50150230	-
circRNA11082	7.65729	7.422	7.41626	8.30066	8.92681	6.02044	7.59596	7.37598	7.28056	7.55493	7.16557	7.9446	down	-0.148893	0.0968167	0.214006	no	chr14	50156999	50204409	-
circRNA11083	5.23996	3.81902	5.02856	5.5912	3.07351	3.08022	3.77224	5.09312	2.99153	2.95775	3.57897	4.55045	down	-0.346464	0.159599	0.297373	no	chr14	50265358	50303017	-
circRNA11084	15.5362	20.8295	22.0423	19.7922	12.7926	5.66542	6.96623	6.592	6.31555	8.99576	6.90699	18.1986	down	-1.3977	0.00183566	0.0434304	yes	chr14	50338947	50341232	-
circRNA11085	3.21298	3.6589	4.64458	4.42917	4.34469	5.05174	6.42471	5.76491	7.09082	6.08285	6.083	4.05806	up	0.583992	0.00180315	0.0434304	no	chr14	50476128	50476306	-
circRNA11086	3.73766	4.42077	3.81569	3.54579	7.47949	12.6946	8.55659	10.8473	6.00896	11.9209	10.0057	4.59988	up	1.12115	0.00756285	0.0621629	yes	chr14	53058477	53091932	-
circRNA11087	0.21665	0.295694	0.393545	0.345973	0.26519	0.718643	0.782376	0.603169	0.463013	0.591042	0.631649	0.30341	up	1.05785	0.00179458	0.0434304	yes	chr14	54981540	55000992	-
circRNA11088	6.92604	6.91429	7.57533	8.64533	9.26213	11.0972	10.8557	9.42142	8.85391	11.783	10.4023	7.86462	up	0.403448	0.00809828	0.0632007	no	chr14	57229734	57247712	-
circRNA11089	8.55968	6.75116	7.90657	11.2626	8.51225	8.5059	10.1649	8.89165	15.437	7.83839	10.1676	8.59846	up	0.241824	0.35195	0.502201	no	chr14	58211292	58213698	+
circRNA1109	2.7567	3.55979	3.10712	2.68498	3.11948	2.5081	2.66904	4.48978	3.48354	4.38655	3.5074	3.04562	up	0.20367	0.344121	0.494284	no	chr7	91992158	92003235	+
circRNA11090	19.1915	21.6017	21.663	18.7062	23.9051	11.0882	12.1499	13.0929	17.7229	11.5476	13.1203	21.0135	down	-0.679516	0.00100336	0.039757	no	chr14	59263441	59340180	+
circRNA11091	2.41502	2.9881	3.08891	2.95712	3.49634	1.25561	1.3152	1.72587	3.19139	1.25412	1.74844	2.9891	down	-0.773643	0.0248987	0.105236	no	chr14	59324128	59326991	+
circRNA11092	18.5338	20.6077	22.7459	18.8811	21.8372	14.8278	20.8437	22.073	21.7604	13.3767	18.5763	20.5211	down	-0.143645	0.37692	0.526146	no	chr14	60808325	60879835	+
circRNA11093	2.89245	3.85211	11.2375	5.01619	4.43091	6.10838	6.43869	4.76027	7.71706	6.42601	6.29008	5.48583	up	0.197368	0.627584	0.740519	no	chr14	61776095	61778910	+
circRNA11094	23.3836	23.9013	27.8114	24.8902	25.8743	16.2751	19.8378	19.9663	21.9369	16.3327	18.8698	25.1721	down	-0.415752	0.00222962	0.0452184	no	chr14	63909098	63942143	+
circRNA11095	9.3889	9.66957	11.2673	9.63186	9.40554	6.29069	8.03755	8.39549	9.28753	6.45125	7.6925	9.87264	down	-0.359982	0.0157609	0.0842038	no	chr14	63909098	64190237	+
circRNA11096	6.54433	7.06968	8.00483	6.89849	6.52497	4.49379	5.77899	6.05468	6.8881	4.94707	5.63253	7.00846	down	-0.315316	0.0291959	0.113449	no	chr14	63998914	64126807	+
circRNA11097	2.46433	3.12312	3.58667	2.53644	2.76888	1.79966	2.06369	2.83611	2.77996	2.14637	2.32516	2.89589	down	-0.316677	0.0863469	0.200267	no	chr14	64048000	64049876	+
circRNA11098	4.80648	3.8594	4.7567	4.11913	4.63113	2.31312	2.49886	3.27413	2.92226	1.91624	2.58492	4.43457	down	-0.778673	0.000344473	0.0360369	no	chr14	64137787	64140073	+
circRNA11099	13.7411	12.7195	14.8516	10.3001	11.1255	6.77203	8.26224	9.43304	10.8861	7.84426	8.63954	12.5476	down	-0.538384	0.00746344	0.061888	no	chr14	64162072	64167639	+
circRNA111	15.135	14.7129	16.3429	15.2493	12.429	9.92882	11.4102	12.7871	22.3947	10.1557	13.3353	14.7738	down	-0.147795	0.578566	0.70213	no	chr13	100257595	100340259	+
circRNA1110	5.595	4.53483	5.56122	6.75339	3.17979	1.58074	2.76357	4.44914	3.03692	3.05721	2.97752	5.12485	down	-0.7834	0.0231073	0.101269	no	chr7	92126253	92131872	-
circRNA11100	25.5521	24.6646	31.3323	24.0599	25.3949	17.085	20.4583	20.9261	24.8474	15.9924	19.8618	26.2008	down	-0.399611	0.0151217	0.0827422	no	chr14	64165285	64202963	+
circRNA11101	6.22425	6.05321	7.95228	5.64191	5.97474	9.49487	9.75412	8.03741	5.98447	6.01562	7.8573	6.36928	up	0.302904	0.15367	0.289571	no	chr14	64448217	64449622	+
circRNA11102	4.54216	4.98737	6.6777	6.44639	6.96592	2.47311	2.80827	5.013	5.39912	1.21272	3.38124	5.92391	down	-0.808996	0.0307964	0.116633	no	chr14	67557269	67562035	+
circRNA11103	6.54054	7.00211	7.51505	7.06313	7.32324	4.70957	5.23444	7.52679	6.79501	3.84123	5.62141	7.08881	down	-0.334612	0.0955173	0.212543	no	chr14	69209424	69237931	+
circRNA11104	6.71545	7.71756	8.77069	6.30107	7.68094	8.17949	8.17037	8.25857	9.24058	6.51561	8.07292	7.43714	up	0.118343	0.331699	0.482868	no	chr14	69441832	69455866	+
circRNA11105	12.7616	12.4957	13.8074	11.7693	18.9827	11.6257	15.7616	12.0195	10.8919	11.2274	12.3052	13.9633	down	-0.182375	0.325614	0.476704	no	chr14	70988567	71089342	+
circRNA11106	5.33564	5.6055	5.86748	5.16723	7.12907	4.95376	6.87554	5.29335	4.93447	4.80125	5.37167	5.82099	down	-0.115892	0.411856	0.559131	no	chr14	71009634	71036157	+
circRNA11107	3.13054	2.88019	2.76113	2.70267	3.21557	3.20306	3.12827	3.10135	1.76337	2.33026	2.70526	2.93802	down	-0.119076	0.47473	0.614861	no	chr14	71587571	71589370	+
circRNA11108	6.866	7.00776	5.39353	7.35071	5.74007	5.59525	6.62663	8.4487	7.11863	5.41681	6.64121	6.47161	up	0.0373196	0.807578	0.875353	no	chr14	72978861	72993357	-
circRNA11109	9.89069	10.7258	11.6266	13.2573	18.3078	10.7426	13.9099	12.2803	14.2518	8.80837	11.9986	12.7616	down	-0.0889479	0.685295	0.787235	no	chr14	73282359	73292874	-
circRNA1111	2.48647	3.17369	3.26153	3.11893	3.32365	3.10077	3.2764	3.88244	3.10333	4.69057	3.6107	3.07285	up	0.2327	0.16704	0.30589	no	chr7	92213195	92226682	-
circRNA11110	6.09885	6.19549	4.41659	9.58766	3.2935	2.51895	3.53964	3.73411	4.30725	2.62479	3.34495	5.91842	down	-0.823228	0.0718573	0.180097	no	chr14	74055584	74057258	+
circRNA11111	4.67279	5.19646	6.02498	4.40307	5.57935	4.54566	5.37994	5.932	6.54597	4.21637	5.32399	5.17533	up	0.0408559	0.78365	0.858304	no	chr14	75764615	75793100	+
circRNA11112	27.5768	21.6424	16.2018	33.2248	18.9669	22.1235	27.1966	22.6301	21.8734	12.774	21.3195	23.5226	down	-0.141871	0.585323	0.707732	no	chr14	76058642	76059373	+
circRNA11113	15.7996	17.3375	17.3646	17.7133	18.3269	20.4725	19.6736	18.2649	17.1145	16.8477	18.4747	17.3084	up	0.0940778	0.201225	0.346022	no	chr14	76166663	76195972	+
circRNA11114	12.7002	15.9905	16.8548	12.5313	15.1379	14.3034	16.2191	12.7434	22.5624	12.9851	15.7627	14.6429	up	0.106309	0.597952	0.718287	no	chr14	77562396	77576915	-
circRNA11115	2.7979	6.54237	6.3934	7.64447	5.54901	6.21009	7.25316	6.71324	7.29112	5.82673	6.65887	5.78543	up	0.202852	0.360156	0.509613	no	chr14	77675656	77679970	-
circRNA11116	5.58311	5.36904	3.86488	4.48506	3.94465	1.90877	2.08366	1.60793	3.1215	1.32969	2.01031	4.64935	down	-1.20961	0.000536549	0.0368952	yes	chr14	88478920	88480352	-
circRNA11117	30.2395	27.3939	29.0579	27.2996	27.3833	20.7424	31.2191	18.0446	32.6251	16.054	23.737	28.2748	down	-0.252378	0.258711	0.408699	no	chr14	90744792	90786328	-
circRNA11118	11.9557	11.7851	14.0785	13.037	10.986	10.7542	10.7476	9.95593	7.94996	13.5093	10.5834	12.3685	down	-0.224863	0.133412	0.263808	no	chr14	91196375	91199905	+
circRNA11119	0.720718	0.866707	1.75216	0.647458	2.41063	2.10658	0.543522	1.38342	2.91803	2.54002	1.89831	1.27953	up	0.5691	0.291886	0.443647	no	chr14	91693126	91708236	-
circRNA1112	3.6997	3.52976	4.33911	4.28424	4.27261	3.59541	5.59794	4.12576	3.6762	5.726	4.54426	4.02509	up	0.175027	0.342449	0.492797	no	chr7	92294889	92352642	+
circRNA11120	16.834	16.833	28.4472	21.5371	25.7345	5.84212	2.04453	0.600041	9.80504	3.54833	4.36801	21.8771	down	-2.32438	0.000431228	0.0365628	yes	chr14	91891221	91895072	-
circRNA11121	4.25653	4.85973	5.19444	4.18872	3.97593	3.23341	3.50559	3.72823	4.88705	3.71628	3.81411	4.49507	down	-0.236997	0.0995632	0.217834	no	chr14	92003419	92007852	-
circRNA11122	5.39208	4.68984	3.39485	4.92402	8.1761	4.82732	7.35908	7.08892	8.60599	4.61462	6.49919	5.31538	up	0.290086	0.314128	0.466021	no	chr14	92093252	92096137	-
circRNA11123	38.5847	23.733	21.8184	78.8038	23.0289	214.049	84.4314	95.5842	43.6092	135.85	114.705	37.1938	up	1.62479	0.0525224	0.151336	no	chr14	92709672	92712871	-
circRNA11124	9.34829	10.2527	9.9059	9.475	9.50916	9.22452	10.4184	8.08254	13.7676	11.0916	10.5169	9.6982	up	0.116923	0.446352	0.589891	no	chr14	93248476	93263993	-
circRNA11125	5.65267	7.52734	7.81626	6.64463	7.13287	6.61925	7.03404	5.99931	6.94014	7.08071	6.73469	6.95475	down	-0.0463885	0.626938	0.740293	no	chr14	95129472	95133503	-
circRNA11126	4.31926	4.162	4.33615	3.48588	4.9688	2.41347	3.65405	3.39452	6.58388	3.77897	3.96498	4.25442	down	-0.101649	0.710735	0.805658	no	chr14	96313065	96313435	-
circRNA11127	19.3954	21.1771	21.7138	18.8892	21.6765	15.0148	19.0621	18.5259	20.2649	18.5507	18.2837	20.5704	down	-0.170012	0.067512	0.173702	no	chr14	96332305	96344756	-
circRNA11128	29.9989	42.3036	44.3075	35.9323	43.0521	33.2289	42.0128	48.848	41.8447	47.3367	42.6542	39.1189	up	0.124824	0.385029	0.533673	no	chr14	96560649	96562893	+
circRNA11129	4.4424	3.53751	3.46667	3.77664	8.02996	5.55891	7.63795	5.69444	7.12294	7.79441	6.76173	4.65063	up	0.539965	0.0741427	0.183637	no	chr14	96833467	96860735	+
circRNA1113	3.2352	3.29045	3.61112	3.4678	3.70721	3.32783	4.63975	3.55644	3.25654	4.63845	3.8838	3.46236	up	0.165715	0.255287	0.404958	no	chr7	92294889	92327900	+
circRNA11130	16.3666	15.4343	15.4709	14.8419	19.794	19.483	20.1227	16.7767	18.2618	20.2255	18.9739	16.3816	up	0.211947	0.0490263	0.146131	no	chr14	101882161	101917947	+
circRNA11131	13.0528	14.4675	15.1807	13.2073	14.5161	16.8722	16.7316	15.7365	15.5079	14.3296	15.8356	14.0848	up	0.169025	0.0223118	0.0996093	no	chr14	102007008	102030282	+
circRNA11132	5.27831	9.39844	8.39223	8.23183	13.7927	7.23796	7.70054	7.10565	9.13717	7.36844	7.70995	9.01871	down	-0.2262	0.404572	0.55303	no	chr14	102193463	102195120	+
circRNA11133	1.41148	1.58091	1.53661	1.30566	0.942568	1.01206	1.12701	1.04385	1.1089	1.06167	1.0707	1.35545	down	-0.340214	0.065901	0.171338	no	chr14	102325985	102331846	+
circRNA11134	5.56837	6.80352	5.75755	4.51923	4.16837	3.41579	4.42171	6.14637	5.23132	2.70244	4.38353	5.36341	down	-0.291058	0.243911	0.393159	no	chr14	102443647	102445947	+
circRNA11135	40.1226	37.7886	31.6743	40.1425	41.431	29.1549	38.2657	34.1862	45.2058	28.6804	35.0986	38.2318	down	-0.12336	0.408124	0.556059	no	chr14	102999565	103012188	-
circRNA11136	62.6669	78.1767	130.731	68.3287	85.0427	59.337	70.2793	81.4329	80.515	73.9114	73.0951	84.9893	down	-0.217507	0.393794	0.542447	no	chr14	103451918	103457212	+
circRNA11137	27.5817	30.6485	30.118	24.1803	27.1081	23.6157	24.615	23.3739	25.663	29.0584	25.2652	27.9273	down	-0.144527	0.125598	0.253632	no	chr14	103462405	103468186	+
circRNA11138	22.6712	29.7953	22.7329	20.542	31.645	18.9376	25.086	15.5148	30.148	22.9022	22.5177	25.4773	down	-0.17815	0.402039	0.550361	no	chr14	103654564	103657776	+
circRNA11139	2.03492	0.721864	0.854286	3.22152	1.82437	0.0583979	0.0106099	0	0.155603	0.594994	0.163921	1.73139	down	-3.40086	0.0238371	0.102751	yes	chr19	756890	760039	+
circRNA1114	3.63205	3.43354	4.10626	4.08347	4.15459	3.41922	5.29076	3.87862	3.50268	5.30893	4.28004	3.88198	up	0.140831	0.415469	0.56209	no	chr7	92294889	92345066	+
circRNA11140	0.961473	1.34686	1.07404	1.37279	1.52117	2.44069	1.4375	2.1365	2.34813	1.44086	1.96074	1.25527	up	0.643401	0.0283171	0.111774	no	chr19	4408903	4409759	+
circRNA11141	38.3406	34.4951	39.8791	31.0635	39.2957	41.8027	49.6694	51.0742	61.9195	40.3966	48.9725	36.6148	up	0.419544	0.0290693	0.113253	no	chr19	5047476	5144902	+
circRNA11142	37.8228	42.6623	36.6725	43.597	33.535	30.1893	30.0643	28.6972	27.867	36.4832	30.6602	38.8579	down	-0.34184	0.01021	0.0699709	no	chr19	5609995	5613527	-
circRNA11143	13.9172	15.0426	10.9437	11.2769	12.7267	8.41937	10.8155	11.5192	12.8946	12.0085	11.1315	12.7814	down	-0.199406	0.166736	0.305665	no	chr19	6742967	6743836	+
circRNA11144	14.3933	12.5927	13.9781	15.9929	14.0013	18.0177	48.2631	46.6091	26.3172	25.6731	32.976	14.1916	up	1.21638	0.0363795	0.126162	yes	chr19	7120620	7152927	-
circRNA11145	11.9452	11.0708	11.434	13.0928	11.6148	15.4026	40.5907	38.3974	24.0466	22.3152	28.1505	11.8315	up	1.25052	0.0282238	0.111715	yes	chr19	7126584	7184637	-
circRNA11146	21.6639	19.1488	23.6959	21.4942	18.8413	22.6048	17.8855	22.2456	24.0784	23.7495	22.1128	20.9688	up	0.0766346	0.446817	0.590238	no	chr19	10772479	10777216	+
circRNA11147	13.9751	15.6055	18.0585	16.0219	17.2879	15.0866	17.8667	19.2708	25.1995	6.87717	16.8602	16.1898	up	0.0585344	0.837088	0.894441	no	chr19	11169877	11170248	-
circRNA11148	36.2977	33.0103	24.4407	19.7158	20.6484	6.91522	9.92798	3.90038	22.9696	9.65882	10.6744	26.8226	down	-1.32929	0.00854956	0.0641917	yes	chr19	11397244	11417059	-
circRNA11149	9.17726	7.39419	5.96495	5.55614	5.74085	1.79888	2.72801	1.21755	6.52593	2.21548	2.89717	6.76668	down	-1.2238	0.0118756	0.0738721	yes	chr19	11411253	11417059	-
circRNA1115	4.16234	3.76365	4.86452	4.95989	4.76723	3.9321	6.17134	4.60812	3.81401	6.4145	4.98801	4.50353	up	0.147411	0.452012	0.594986	no	chr7	92319330	92362273	+
circRNA11150	12.246	12.8188	11.6484	11.2865	9.34706	10.1507	12.7232	12.6232	10.2401	10.6224	11.2719	11.4694	down	-0.025053	0.817245	0.88138	no	chr19	12679457	12680325	-
circRNA11151	2.53144	0.808306	1.54347	2.19698	4.13056	3.99186	3.07063	4.2644	2.14445	2.14689	3.12365	2.24215	up	0.478347	0.253009	0.402448	no	chr19	13804792	13805148	+
circRNA11152	13.9441	11.8852	13.0162	13.3808	16.996	18.0535	22.8121	27.1537	17.4815	15.6322	20.2266	13.8445	up	0.546946	0.0349518	0.123863	no	chr19	14458031	14458375	+
circRNA11153	28.633	42.7133	28.1412	21.403	31.4486	25.3587	73.9446	54.7745	78.5254	25.571	51.6348	30.4678	up	0.761058	0.139203	0.270921	no	chr19	15184295	15185679	-
circRNA11154	28.0013	23.9169	27.0215	26.8984	31.644	27.3424	27.4999	29.2582	23.9653	32.0644	28.026	27.4964	up	0.0275228	0.77795	0.854575	no	chr19	16647120	16654125	-
circRNA11155	10.9378	12.7356	15.2938	13.5926	13.7116	6.71255	8.48455	5.91696	13.3563	7.46562	8.3872	13.2543	down	-0.660199	0.0165986	0.08638	no	chr19	21405129	21405856	+
circRNA11156	30.6218	29.8564	35.4674	28.3314	32.5199	32.3232	35.5323	30.7292	34.5483	34.4285	33.5123	31.3594	up	0.0957942	0.194662	0.338726	no	chr19	34196634	34215300	+
circRNA11157	5.29835	8.09969	9.65241	10.2057	9.65608	5.2309	9.521	9.05615	14.8245	10.0791	9.74233	8.58246	up	0.182876	0.535304	0.667759	no	chr19	37089039	37096115	+
circRNA11158	4.79458	6.55033	6.08982	5.86775	5.80912	4.64294	4.32186	3.53996	2.34552	4.56593	3.88324	5.82232	down	-0.584333	0.00731012	0.0615583	no	chr19	38917724	38918813	-
circRNA11159	3.52266	3.87785	2.94219	1.4437	2.57484	2.21546	1.88677	1.23933	1.71297	2.1803	1.84697	2.87225	down	-0.637022	0.0717822	0.179994	no	chr19	39453356	39453521	+
circRNA1116	1.84403	1.90073	2.33596	1.79454	1.83331	1.14864	1.86655	2.5558	1.83453	1.57952	1.79701	1.94171	down	-0.111735	0.585686	0.708005	no	chr7	92501507	92511703	-
circRNA11160	8.34017	5.54933	5.31915	3.50144	4.68858	0.234545	0.0532661	0	4.6174	0.108622	1.00277	5.47973	down	-2.45012	0.00611417	0.0577209	yes	chr19	42005723	42006810	-
circRNA11161	6.55054	8.88945	7.74537	6.29854	4.86169	6.20933	6.7292	8.09263	11.9215	5.44861	7.68025	6.86912	up	0.161029	0.563299	0.689762	no	chr19	44228446	44229816	+
circRNA11162	10.6947	11.5537	9.63815	9.99819	9.57099	10.657	11.6991	10.4254	9.72348	8.07039	10.1151	10.2911	down	-0.0248956	0.811037	0.877777	no	chr19	45258989	45271708	+
circRNA11163	3.10351	2.17375	1.86432	2.25663	5.35286	2.94352	2.97541	2.16964	1.44175	3.12734	2.53153	2.95021	down	-0.22081	0.577574	0.701317	no	chr19	49476145	49480620	+
circRNA11164	26.72	30.6006	30.1014	24.5027	26.5182	14.218	23.296	42.9033	108.486	22.8464	42.35	27.6886	up	0.613071	0.442295	0.586222	no	chr19	51860904	51877377	-
circRNA11165	12.7841	12.7606	9.3447	13.99	15.1876	14.6138	15.4306	20.9557	15.9692	12.8501	15.9639	12.8134	up	0.317159	0.0996271	0.217928	no	chr18	216486	224179	-
circRNA11166	6.23283	6.09592	7.32323	6.0521	11.3082	8.12266	11.4083	9.91582	6.72373	9.14695	9.06349	7.40246	up	0.292061	0.232315	0.380642	no	chr18	2762105	2770108	+
circRNA11167	4.30446	3.37903	3.95342	2.09782	4.58572	4.71495	4.1352	4.94192	4.14295	4.51083	4.48917	3.66409	up	0.292995	0.137937	0.26953	no	chr18	2769694	2770108	+
circRNA11168	1.28949	3.2306	1.58744	2.63214	2.70902	0.755389	3.05526	1.14293	1.95114	1.16612	1.61417	2.28974	down	-0.504391	0.253676	0.403115	no	chr18	3187480	3193958	-
circRNA11169	25.318	20.7107	18.652	33.968	26.875	29.4543	29.0497	36.742	10.9228	25.9288	26.4195	25.1048	up	0.0736439	0.801569	0.871153	no	chr18	6171828	6312056	-
circRNA1117	5.56036	6.44415	7.55577	5.19435	6.96649	3.93605	6.64373	4.35779	11.7727	4.61021	6.2641	6.34422	down	-0.0183359	0.960067	0.974405	no	chr7	94598775	94629841	-
circRNA11170	6.52481	5.83075	6.73027	7.58179	8.27343	9.56912	12.9332	19.3282	23.4677	26.0344	18.2665	6.98821	up	1.38621	0.0213625	0.0973873	yes	chr18	8069686	8143779	+
circRNA11171	10.0571	10.8806	11.4523	10.7827	15.5343	15.0339	16.108	21.4997	14.7717	15.4491	16.5725	11.7414	up	0.497185	0.0170901	0.0875886	no	chr18	9195551	9211784	+
circRNA11172	5.76807	4.81603	5.59348	6.31259	6.87799	6.65215	6.04499	6.2726	8.89644	6.3907	6.85138	5.87363	up	0.222141	0.162272	0.300364	no	chr18	9557221	9595153	-
circRNA11173	2.92483	2.68317	3.16904	3.63129	3.70698	3.33766	3.33201	3.24154	4.69125	3.22087	3.56467	3.22306	up	0.145335	0.35446	0.504467	no	chr18	9577064	9595153	-
circRNA11174	5.21122	6.15843	6.17247	5.55726	4.18381	5.24148	4.32137	10.4979	3.57141	3.9904	5.52451	5.45664	up	0.0178332	0.961278	0.97538	no	chr18	12348273	12363856	-
circRNA11175	24.5031	28.7352	25.6348	20.9011	20.3376	38.2415	40.9929	46.2693	34.7751	32.9975	38.6553	24.0224	up	0.686286	0.00130521	0.0419346	no	chr18	12506477	12535601	-
circRNA11176	21.3773	18.7466	19.8071	23.3973	26.5853	31.8011	22.846	21.8808	20.7462	27.0797	24.8708	21.9827	up	0.17808	0.279679	0.430977	no	chr18	12814203	12859254	-
circRNA11177	1.62193	1.83044	1.50449	1.45909	2.30233	1.52573	1.90942	2.17031	1.77783	2.0289	1.88244	1.74366	up	0.110484	0.486256	0.625585	no	chr18	13048859	13073185	+
circRNA11178	3.22919	3.96716	3.75457	3.94776	5.83097	3.68992	4.84911	5.70017	4.51069	4.58851	4.66768	4.14593	up	0.17101	0.370798	0.520076	no	chr18	13099476	13103588	+
circRNA11179	58.9278	54.2932	63.3221	58.4488	88.1337	89.1892	127.416	187.401	71.9865	84.0014	111.999	64.6251	up	0.793315	0.0864821	0.20039	no	chr18	13387341	13438384	+
circRNA1118	4.06552	5.30649	6.86566	4.48145	5.54247	2.99267	5.53788	3.64086	10.0128	3.5442	5.14568	5.25232	down	-0.0295907	0.941279	0.962262	no	chr7	94618758	94629841	-
circRNA11180	1.02292	2.13695	1.95198	1.43425	2.29311	1.66173	2.47082	2.5341	2.47626	2.84302	2.39719	1.76784	up	0.439353	0.0755023	0.185269	no	chr18	20986950	20992937	-
circRNA11181	3.2273	2.76597	3.25108	3.04503	3.3734	1.82345	2.6853	2.74465	3.07002	1.96931	2.45855	3.13255	down	-0.349534	0.0456913	0.141232	no	chr18	21765772	21791557	+
circRNA11182	0.493277	0.285191	0.628169	0.32268	0.457627	1.0295	1.12524	0.772399	0.460574	1.05614	0.888771	0.437389	up	1.0229	0.0170368	0.0875077	yes	chr18	24311984	24318809	-
circRNA11183	6.57465	12.6512	8.14764	7.47209	4.8877	2.19074	3.8807	1.94005	2.98815	3.45438	2.89081	7.94666	down	-1.45888	0.0152397	0.0830601	yes	chr18	31630959	31666372	-
circRNA11184	6.12522	12.2359	9.24146	7.67833	5.11346	2.33256	3.61322	2.2762	3.29719	3.33078	2.96999	8.07887	down	-1.4437	0.0136394	0.0786433	yes	chr18	31638644	31666372	-
circRNA11185	4.47706	4.71079	5.40591	5.75456	6.35122	4.3564	5.24972	5.62859	5.24669	5.78582	5.25344	5.33991	down	-0.023552	0.843396	0.898819	no	chr18	31890735	31913522	-
circRNA11186	3.11083	3.4494	3.87097	3.51977	3.85048	3.14452	3.29279	3.9081	3.63888	3.18494	3.43385	3.56029	down	-0.0521706	0.551908	0.681457	no	chr18	31907460	31917667	-
circRNA11187	5.36765	6.52427	6.30574	6.57431	5.82763	5.31141	8.43196	0.605212	7.20797	5.87256	5.48582	6.11992	down	-0.157806	0.662792	0.769322	no	chr18	32287031	32310323	-
circRNA11188	7.89665	9.59034	10.278	6.18535	6.80657	1.06268	4.2726	11.1262	14.5421	5.71256	7.34321	8.15138	down	-0.150633	0.764494	0.844794	no	chr18	33607594	33627070	+
circRNA11189	19.4052	22.4855	26.5639	13.7934	16.4544	2.67908	9.87363	26.6886	30.5425	13.0982	16.5764	19.7405	down	-0.252026	0.60043	0.719976	no	chr18	33607594	33646353	+
circRNA1119	3.30434	3.58403	3.51449	3.1546	3.06579	2.33994	2.67882	4.00505	2.55936	3.68973	3.05458	3.32465	down	-0.122228	0.473195	0.61333	no	chr7	98190728	98194572	+
circRNA11190	2.18538	1.76769	2.31812	2.31443	3.15371	2.74218	3.50967	5.25368	3.24776	2.88935	3.52853	2.34787	up	0.587717	0.0588577	0.160458	no	chr18	36144939	36146381	+
circRNA11191	1.87448	1.50278	1.54994	1.21379	1.46192	0.453873	0.0294504	1.82805	0.678722	1.32124	0.862267	1.52058	down	-0.818417	0.109142	0.231423	no	chr18	36198690	36200324	+
circRNA11192	28.5864	22.8643	25.594	32.8053	16.8223	6.64038	8.7117	25.1411	5.43871	8.13514	10.8134	25.3345	down	-1.22828	0.0137459	0.0789704	yes	chr18	36658075	36709391	+
circRNA11193	239.685	351.02	388.665	264.984	355.877	172.177	244.708	196.178	337.441	178.282	225.757	320.046	down	-0.503508	0.0551278	0.154831	no	chr18	44701175	44869283	+
circRNA11194	63.749	90.9353	97.9014	72.3479	89.3698	46.5907	64.5179	52.4542	89.2185	45.4961	59.6555	82.8607	down	-0.474033	0.0565584	0.15709	no	chr18	44701175	44953340	+
circRNA11195	2.44516	2.63882	1.69416	2.71412	3.34736	2.26637	2.01948	2.9031	1.99011	2.20523	2.27686	2.56792	down	-0.17356	0.384617	0.533244	no	chr18	45910521	45913828	-
circRNA11196	2.33003	2.61727	1.69463	2.85356	3.61833	2.60875	2.03627	3.02775	1.9821	2.3917	2.40931	2.62276	down	-0.122464	0.582934	0.705917	no	chr18	45910521	45912456	-
circRNA11197	3.23915	3.34153	3.83774	4.00204	3.14057	4.629	3.72047	6.92397	3.77786	4.09679	4.62962	3.51221	up	0.398516	0.135652	0.266466	no	chr18	45943161	45946768	-
circRNA11198	6.29795	6.34108	5.05513	5.93932	8.51671	6.76386	5.71438	7.19394	5.4428	6.71244	6.36548	6.43004	down	-0.0145576	0.925214	0.951915	no	chr18	46215811	46216595	+
circRNA11199	46.4125	50.0341	55.4668	47.865	57.2812	54.1769	64.7269	79.8875	55.1854	65.6222	63.9198	51.4119	up	0.31416	0.0524012	0.151191	no	chr18	49097402	49333853	-
circRNA112	5.27973	4.96866	5.99051	5.64741	4.40551	3.80141	4.26305	4.83302	7.60915	4.05933	4.91319	5.25836	down	-0.097953	0.662697	0.769254	no	chr13	100301460	100340259	+
circRNA1120	3.09457	3.49378	3.39357	3.13045	2.83119	2.24106	2.44768	3.83264	2.53386	3.40191	2.89143	3.18871	down	-0.141191	0.407034	0.555264	no	chr7	98191614	98194572	+
circRNA11200	17.4385	16.3372	21.4334	21.7504	16.2658	10.5988	7.93838	6.06517	22.2825	6.73393	10.7238	18.6451	down	-0.797984	0.0550757	0.154806	no	chr18	49912062	49937397	-
circRNA11201	17.1104	15.2802	18.7506	15.6605	13.5678	8.96822	5.79796	4.40397	18.8813	6.45861	8.90202	16.0739	down	-0.852515	0.0485417	0.145416	no	chr18	49929512	49954435	-
circRNA11202	2.97731	3.52714	3.67152	3.05667	4.41413	8.88016	5.9725	8.47415	4.07817	8.97598	7.27619	3.52935	up	1.04378	0.0159823	0.0847269	yes	chr18	50918110	50940386	+
circRNA11203	16.0298	17.5697	19.885	16.0632	18.8262	15.1084	17.9345	22.4915	23.3313	17.688	19.3108	17.6748	up	0.127709	0.382549	0.531135	no	chr18	51046920	51067187	+
circRNA11204	50.8039	57.3238	65.2414	56.303	90.2675	83.3601	96.0648	94.6411	107.505	100.751	96.4645	63.9879	up	0.592198	0.00595375	0.0572629	no	chr18	54159765	54205157	-
circRNA11205	14.5015	14.7288	14.0256	14.3979	27.7596	28.6239	66.8848	61.9796	58.5362	38.3595	50.8768	17.0827	up	1.57447	0.00758068	0.0622505	yes	chr18	55269831	55279656	-
circRNA11206	5.45561	7.21303	7.15998	6.23991	7.75632	6.50332	8.48768	9.16749	6.26015	8.89818	7.86336	6.76497	up	0.217064	0.180914	0.322347	no	chr18	56731383	56781656	+
circRNA11207	38.8285	36.8369	36.1046	30.6596	14.0489	6.5973	9.32411	7.74569	23.6146	5.73636	10.6036	31.2957	down	-1.56141	0.00710196	0.061303	yes	chr18	58341038	58351045	+
circRNA11208	56.9901	51.86	54.9768	49.0889	22.8413	10.3015	14.9387	12.9088	39.5892	9.93029	17.5337	47.1514	down	-1.42717	0.00775684	0.0626104	yes	chr18	58341038	58367867	+
circRNA11209	2.32113	2.90294	2.96783	2.07389	2.97587	3.00405	4.71367	7.24054	4.44791	3.10124	4.50148	2.64833	up	0.765316	0.0717395	0.179937	no	chr18	58934433	58939621	+
circRNA1121	7.57927	8.40738	7.704	7.27697	9.08832	7.77389	7.51901	12.8983	7.54965	7.67228	8.68263	8.01119	up	0.116116	0.571029	0.696149	no	chr7	98965696	98971945	+
circRNA11210	13.2617	15.0854	19.3226	10.8409	15.3908	13.9762	17.9915	21.1958	14.05	16.3872	16.7201	14.7803	up	0.177915	0.346866	0.497058	no	chr18	62101075	62161385	-
circRNA11211	2.578	2.59889	2.378	2.39817	1.71714	2.59072	2.98142	2.69067	2.20102	2.55532	2.60383	2.33404	up	0.157806	0.224335	0.372421	no	chr18	70051411	70065922	-
circRNA11212	0.627585	0.924889	0.658771	0.779179	0.68269	0.638483	0.978764	1.05007	0.410126	0.790981	0.773685	0.734623	up	0.0747432	0.771031	0.849538	no	chr18	70092110	70092804	-
circRNA11213	3.1833	3.37209	3.17813	3.9906	2.89566	3.09742	3.79175	5.4449	2.92336	3.52215	3.75592	3.32396	up	0.176264	0.411856	0.559131	no	chr18	70109498	70128546	-
circRNA11214	4.49684	4.44106	3.41418	9.20302	4.23739	4.23546	4.67557	5.274	3.81729	4.81777	4.56402	5.1585	down	-0.176647	0.601668	0.721087	no	chr18	70188108	70193453	-
circRNA11215	2.35262	2.64172	2.84131	2.02994	2.86187	1.8341	2.44578	2.46476	2.15182	2.47391	2.27408	2.54549	down	-0.162664	0.217281	0.364646	no	chr18	76849526	76947652	+
circRNA11216	1.89597	2.11929	2.23582	1.59017	2.37912	1.47184	1.88942	1.95496	1.82668	2.15725	1.86003	2.04407	down	-0.136122	0.332316	0.483622	no	chr18	76849526	76908573	+
circRNA11217	8.59231	8.01259	8.65567	9.39403	9.29541	8.32344	8.63779	10.8334	9.22551	10.1915	9.44233	8.79	up	0.103279	0.267547	0.417974	no	chr18	79126267	79214038	+
circRNA11218	9.87544	9.83379	11.0629	9.71413	11.1565	9.76249	11.2695	14.6928	10.6957	11.6209	11.6083	10.3285	up	0.168517	0.209213	0.35546	no	chr18	79176813	79277196	+
circRNA11219	12.6391	10.3974	9.1885	11.5274	12.1032	13.1067	9.31381	11.0049	8.57565	12.8815	10.9765	11.1711	down	-0.0253553	0.865036	0.912502	no	chr18	79695225	79718016	+
circRNA1122	4.92443	4.9933	4.24893	4.18768	4.68979	4.30976	4.63178	7.13824	4.07088	4.18196	4.86652	4.60883	up	0.0784924	0.686405	0.787858	no	chr7	98967041	98967698	+
circRNA11220	29.0112	23.5508	26.9172	27.2334	18.1785	25.368	20.4135	16.4332	31.1651	18.5638	22.3887	24.9782	down	-0.157899	0.452828	0.595532	no	chr22	17598194	17600095	-
circRNA11221	29.9533	30.8049	26.1616	31.8883	39.0546	31.9088	40.0336	29.2447	31.3277	36.7409	33.8511	31.5725	up	0.100534	0.452556	0.595372	no	chr22	19068100	19089490	-
circRNA11222	20.3189	17.861	18.8593	16.3741	14.6896	13.0134	14.2509	17.8579	13.6889	12.0427	14.1708	17.6206	down	-0.314344	0.0381567	0.129114	no	chr22	20446443	20458000	-
circRNA11223	13.1848	8.56266	7.4346	7.64548	14.2099	5.03374	8.34661	5.8534	6.69475	6.62854	6.51141	10.2075	down	-0.648586	0.0611886	0.164042	no	chr22	21970210	21972718	-
circRNA11224	48.2013	41.7029	37.734	75.3679	35.8064	20.3203	32.7052	16.899	13.8856	27.1799	22.198	47.7625	down	-1.10545	0.0199238	0.0940407	yes	chr22	23659865	23686995	-
circRNA11225	479.802	386.577	326.487	661.937	333.387	216.291	357.444	167.297	118.917	240.437	220.077	437.638	down	-0.991728	0.0226264	0.100155	no	chr22	23683725	23700845	-
circRNA11226	3.00348	4.08095	3.89157	3.00315	4.52016	3.36646	4.21797	3.56332	4.0117	4.00044	3.83198	3.69986	up	0.0506179	0.711624	0.806077	no	chr22	24302195	24338477	+
circRNA11227	4.16136	3.54388	4.16147	4.87146	8.13762	4.83604	5.898	4.24145	3.95236	6.34132	5.05383	4.97516	up	0.0226354	0.935891	0.958873	no	chr22	28296198	28297852	-
circRNA11228	10.8954	8.82116	12.7394	12.4636	11.7445	8.90426	9.4787	7.36215	8.57199	9.14527	8.69247	11.3328	down	-0.382668	0.0158386	0.0844219	no	chr22	29636751	29642285	+
circRNA11229	16.9261	20.0857	19.0821	16.9648	20.9563	24.8047	20.6371	17.8138	20.9979	22.4123	21.3332	18.803	up	0.182136	0.11335	0.2368	no	chr22	29822335	29832342	-
circRNA1123	17.9799	21.2495	16.8625	19.096	15.3245	18.0133	15.6446	21.4352	18.5334	13.587	17.4427	18.1025	down	-0.0535661	0.70371	0.800365	no	chr7	100023419	100024307	+
circRNA11230	9.51058	9.29632	7.87733	10.0249	12.1054	6.80454	8.66362	9.83084	9.84046	9.9502	9.01793	9.76291	down	-0.114514	0.437896	0.582109	no	chr22	30942112	30950445	-
circRNA11231	1.75047	1.67652	1.82622	1.78974	1.77397	1.54849	1.45691	1.16373	2.05295	1.64774	1.57396	1.76338	down	-0.163943	0.262347	0.412634	no	chr22	31458475	31463967	-
circRNA11232	106.123	146.765	129.215	96.6686	122.515	94.3678	102.161	84.4248	138.963	112.246	106.433	120.257	down	-0.176186	0.312229	0.464197	no	chr22	38361399	38380990	-
circRNA11233	1.59593	2.06543	1.7462	1.29217	1.57441	1.61943	1.42392	1.53522	1.71355	1.75136	1.6087	1.65483	down	-0.04079	0.752748	0.835629	no	chr22	41146739	41150198	+
circRNA11234	14.6793	13.6912	14.1719	16.2756	17.451	13.4648	12.3949	10.0734	9.15704	14.3613	11.8903	15.2538	down	-0.359386	0.0268042	0.108715	no	chr22	41268097	41281082	-
circRNA11235	34.3689	29.405	25.1482	28.9259	19.554	11.8953	13.9517	11.8788	13.3382	10.8695	12.3867	27.4804	down	-1.14961	0.00288689	0.0474015	yes	chr22	41893117	41903155	+
circRNA11236	28.8443	27.476	27.6495	27.6974	33.0858	30.4003	30.2797	25.5001	33.0882	25.5282	28.9593	28.9506	up	0.000433903	0.996337	0.997655	no	chr22	42587506	42599793	-
circRNA11237	2.07342	2.11632	2.06571	2.27781	1.75971	0.398447	0.158356	0	1.44559	0.11533	0.423544	2.05859	down	-2.28108	0.00226237	0.0452184	yes	chr22	43207534	43214251	-
circRNA11238	8.92284	9.29746	12.882	9.37341	7.36639	8.35394	7.23573	9.94606	13.1673	7.95191	9.33098	9.56841	down	-0.0362502	0.868808	0.915043	no	chr22	43667104	43687581	-
circRNA11239	3.46877	3.79275	6.01427	4.00879	4.27628	3.76803	4.63166	5.22036	5.87812	3.89368	4.67837	4.31217	up	0.117591	0.557477	0.685774	no	chr22	43711475	43735993	-
circRNA1124	8.08363	6.75073	7.1169	6.28896	7.51296	7.22737	3.5518	3.39346	2.25499	7.13323	4.71217	7.15064	down	-0.60168	0.0763269	0.186211	no	chr7	100155262	100155455	-
circRNA11240	16.7797	15.4741	18.9638	15.4718	14.7316	14.2332	16.311	15.6551	24.9721	12.8208	16.7984	16.2842	up	0.0448523	0.828878	0.889384	no	chr22	43755766	43782325	-
circRNA11241	36.9408	41.0039	43.395	25.0127	22.6509	5.97236	6.77045	4.53338	24.6712	5.60591	9.51066	33.8006	down	-1.82943	0.00276483	0.0470826	yes	chr22	44814672	44849060	+
circRNA11242	4.40729	5.60309	5.21799	2.38351	2.19192	0	0.0356928	0.105502	0	0.0727862	0.0427961	3.96076	down	-6.53215	0.00525789	0.0551342	yes	chr22	44913822	44920490	-
circRNA11243	9.19311	15.5863	15.9906	12.1765	16.1087	16.7638	0.732642	1.8562	4.11153	0.266791	4.74619	13.8111	down	-1.54098	0.039046	0.130508	yes	chr22	45541229	45543526	+
circRNA11244	9.55221	9.01766	10.6084	13.1929	5.72442	5.18198	7.18426	6.08842	3.90596	4.08691	5.28951	9.61912	down	-0.862771	0.0191209	0.0920458	no	chr22	46231792	46232239	+
circRNA11245	26.5801	19.302	22.4872	27.2176	23.1366	15.0904	20.9892	21.199	17.7998	16.384	18.2925	23.7447	down	-0.376355	0.0210887	0.0967553	no	chr22	46343262	46346544	+
circRNA11246	5.78311	9.28758	6.99516	5.56063	9.7914	29.8458	21.6113	23.1552	14.9407	11.7733	20.2652	7.48358	up	1.43721	0.0137301	0.0789243	yes	chr22	46673670	46674750	+
circRNA11247	162.179	168.459	177.785	183.43	219.726	277.784	248.684	265.108	238.499	250.626	256.14	182.316	up	0.490494	0.000488893	0.0366471	no	chr22	46878653	47037198	+
circRNA11248	43.1565	47.4458	44.39	40.2186	35.1405	26.0959	34.4513	27.7412	35.9058	31.1221	31.0633	42.0703	down	-0.437592	0.00450059	0.0527901	no	chr20	3318289	3326284	-
circRNA11249	12.2852	12.8212	12.9693	10.4092	8.27047	6.94545	7.43458	9.64024	9.20874	5.62929	7.77166	11.3511	down	-0.546533	0.0157203	0.0841152	no	chr20	3575827	3591306	+
circRNA1125	159.274	130.602	143.079	161.422	150.423	93.3215	134.786	101.058	84.0171	150.596	112.756	148.96	down	-0.401725	0.0443388	0.13935	no	chr7	101916115	102195603	+
circRNA11250	11.3686	13.3607	13.3994	11.1121	7.27393	6.60023	9.87412	9.63577	11.5955	7.63104	9.06733	11.3029	down	-0.317949	0.15648	0.293348	no	chr20	3597906	3604262	+
circRNA11251	27.1848	40.4896	30.4233	23.0778	28.9698	40.79	43.6619	69.9206	90.6282	29.468	54.8937	30.0291	up	0.870282	0.088384	0.20267	no	chr20	3934994	3964024	-
circRNA11252	7.38193	11.0378	16.0202	4.80484	8.07005	12.2967	15.1328	17.9267	14.3389	9.52665	13.8443	9.46298	up	0.54893	0.105927	0.2268	no	chr20	8684932	8741573	+
circRNA11253	1.65445	2.89965	3.10387	0.829716	2.43729	3.27556	3.2053	4.17185	3.10813	2.04007	3.16018	2.185	up	0.532377	0.110289	0.23279	no	chr20	8757046	8765358	+
circRNA11254	69.9288	78.2876	113.951	57.4217	187.615	90.6818	82.8603	88.5227	125.138	267.263	130.893	101.441	up	0.367749	0.506445	0.643802	no	chr20	9217390	9339037	+
circRNA11255	29.4578	28.3365	39.395	33.0405	33.8158	32.1937	26.5108	17.6464	19.7947	27.954	24.8199	32.8091	down	-0.402599	0.0452462	0.140661	no	chr20	13072256	13126717	+
circRNA11256	51.3261	52.2852	46.5382	47.0656	42.6151	37.1603	38.7811	34.4888	31.0664	36.6172	35.6227	47.966	down	-0.429214	0.000645874	0.0370562	no	chr20	16406374	16515664	-
circRNA11257	5.77424	7.14639	7.83346	6.55393	9.17406	6.67688	4.86665	10.6404	8.90083	5.64868	7.34668	7.29642	up	0.00990357	0.968271	0.979944	no	chr20	20583050	20601846	-
circRNA11258	8.02151	9.14092	9.26819	8.02887	10.6665	8.678	6.85919	14.8324	12.2064	7.38372	9.99195	9.0252	up	0.146807	0.573945	0.698496	no	chr20	20583050	20620630	-
circRNA11259	10.1038	11.0462	12.4866	12.9977	14.5821	16.0021	17.1117	15.8914	14.2423	16.4257	15.9347	12.2433	up	0.380178	0.00548332	0.0556033	no	chr20	21326279	21368590	+
circRNA1126	13.2853	13.1794	11.1302	11.135	11.8792	8.05429	9.1421	7.23086	6.91839	10.2689	8.32292	12.1218	down	-0.542446	0.00150675	0.0431249	no	chr7	102195507	102200172	+
circRNA11260	7.7642	7.59668	8.78603	8.30911	9.88272	11.4446	10.5006	10.4376	10.4113	11.4887	10.8566	8.46775	up	0.358518	0.00193452	0.0438843	no	chr20	21330616	21344208	+
circRNA11261	47.5142	73.7311	68.2068	44.7653	54.4363	34.6472	45.3412	43.3389	45.6406	40.1022	41.814	57.7307	down	-0.465352	0.0464258	0.142396	no	chr20	23381213	23403072	-
circRNA11262	13.6381	13.208	11.4176	12.5123	11.6774	12.5056	9.80468	16.9208	11.8762	10.2695	12.2754	12.4907	down	-0.0250886	0.878159	0.921443	no	chr20	32133013	32145423	+
circRNA11263	4.03462	5.5216	4.09776	4.48238	5.31461	3.65156	3.64189	4.0438	4.10466	4.24131	3.93664	4.69019	down	-0.252681	0.0701794	0.177689	no	chr20	33366859	33385770	-
circRNA11264	3.25548	3.50749	4.13011	2.90824	3.36648	3.05187	3.38232	5.11229	2.83519	3.04647	3.48563	3.43356	up	0.0217143	0.914035	0.944474	no	chr20	33619517	33629914	+
circRNA11265	9.40525	11.9311	12.7003	9.32221	10.6719	7.73547	10.2193	14.9351	8.95967	10.3502	10.4399	10.8062	down	-0.0497391	0.801109	0.870835	no	chr20	33636640	33640531	+
circRNA11266	7.01477	7.61724	8.1751	7.91336	9.02891	7.86143	9.46204	9.95899	8.68991	8.86119	8.96671	7.94988	up	0.173647	0.0703544	0.177959	no	chr20	34424480	34481206	+
circRNA11267	5.0817	5.12204	5.30325	5.71095	6.77116	4.89802	6.98955	6.83566	5.95907	5.83834	6.10413	5.59782	up	0.124921	0.334228	0.485429	no	chr20	34471444	34479789	+
circRNA11268	8.94522	10.0848	10.2466	10.841	12.7919	10.6639	11.9627	12.6355	10.2882	11.0032	11.3107	10.5819	up	0.0960885	0.37263	0.521912	no	chr20	35044505	35044712	-
circRNA11269	2.54958	2.79231	2.32481	2.35994	3.42397	2.77067	3.41765	4.25966	3.57606	3.42947	3.4907	2.69012	up	0.375845	0.0337191	0.121722	no	chr20	35842573	35863400	+
circRNA1127	5.43883	6.44675	5.39364	8.10112	3.80873	3.03438	3.61787	4.48121	5.70296	4.21583	4.21045	5.83781	down	-0.471453	0.0941879	0.210814	no	chr7	102227367	102227669	+
circRNA11270	0.404919	0.555537	0.940259	0.571932	0.189914	0.350158	0.430746	0.54846	0.19041	0.277997	0.359554	0.532512	down	-0.566605	0.255946	0.405667	no	chr20	35972629	35995152	+
circRNA11271	24.845	28.1299	31.8958	19.9194	20.936	13.7743	17.8389	14.334	29.7739	9.46509	17.0372	25.1452	down	-0.561592	0.0900116	0.204858	no	chr20	36173764	36198041	+
circRNA11272	3.46487	4.12161	5.29075	2.60172	2.99133	2.73778	3.41823	3.74224	4.3145	2.27713	3.29797	3.69406	down	-0.163626	0.525394	0.659634	no	chr20	36793249	36794599	-
circRNA11273	8.16129	11.9924	13.9794	6.36936	9.6395	6.84083	9.47282	8.95163	11.6356	7.06402	8.79299	10.0284	down	-0.189665	0.468541	0.609264	no	chr20	36793249	36839441	-
circRNA11274	3.6383	4.15271	4.81998	4.04361	5.03763	3.88914	3.92496	4.84806	5.18284	3.86658	4.34232	4.33845	up	0.00128715	0.992137	0.995244	no	chr20	38516192	38521698	+
circRNA11275	3.02648	3.84815	3.43214	3.01698	3.2297	4.3049	5.27637	6.54609	6.40769	3.72807	5.25262	3.31069	up	0.665906	0.0229373	0.100814	no	chr20	44503815	44510028	-
circRNA11276	4.57177	5.1201	6.93578	3.43232	4.12464	3.30607	3.9777	3.92941	2.77063	5.38579	3.87392	4.83692	down	-0.320296	0.230889	0.37899	no	chr20	47224317	47229806	-
circRNA11277	3.45541	4.21595	5.98615	2.9639	3.90024	3.47654	4.24566	4.42316	2.73417	5.43417	4.06274	4.10433	down	-0.0146938	0.953309	0.969831	no	chr20	47227203	47229806	-
circRNA11278	19.8445	18.8119	15.9739	15.2096	14.2811	11.836	9.61939	13.9093	14.9021	8.45238	11.7438	16.8242	down	-0.518633	0.0144647	0.0810644	no	chr20	48984729	48985613	+
circRNA11279	4.24208	4.54697	4.67295	4.05188	3.71488	4.1116	4.66046	4.95408	5.64915	4.38783	4.75263	4.24575	up	0.162705	0.152833	0.288484	no	chr20	49074785	49089746	+
circRNA1128	58.955	72.0538	86.2258	41.6172	43.7112	49.6513	49.146	78.334	34.1511	47.9535	51.8472	60.5126	down	-0.22297	0.459244	0.601198	no	chr7	102566582	102569924	-
circRNA11280	18.1121	18.1827	21.7997	19.8587	24.4287	25.6297	9.9782	7.46448	3.96818	12.3406	11.8762	20.4764	down	-0.785881	0.0803399	0.192183	no	chr20	50616002	50620132	-
circRNA11281	5.66119	6.30208	4.29093	4.10729	7.84695	6.145	6.0577	9.15918	6.21781	6.45723	6.80738	5.64169	up	0.270974	0.235811	0.384523	no	chr20	58243512	58251864	-
circRNA11282	1.47667	1.37021	2.3191	2.95869	0.395763	1.70262	2.19114	2.28587	0.810125	1.31419	1.66079	1.70409	down	-0.0371286	0.935685	0.958803	no	chr20	59968967	59970186	+
circRNA11283	2.84087	2.89056	3.97695	3.77387	2.0216	0.931841	2.00082	3.33613	3.0096	1.40364	2.13641	3.10077	down	-0.53744	0.13683	0.268048	no	chr20	62857395	62859526	-
circRNA11284	219.935	184.222	185.822	330.879	252.166	269.353	229.167	215.356	363.945	255.005	266.565	234.605	up	0.184256	0.420698	0.566665	no	chr21	14991201	15043574	-
circRNA11285	9.21256	10.6233	11.2929	9.18549	11.1007	7.86406	9.44066	7.2148	10.4869	10.1916	9.03961	10.283	down	-0.185929	0.157827	0.295288	no	chr21	15777904	15818846	+
circRNA11286	2.47326	2.91153	5.04366	3.06566	3.3063	0.95343	1.21724	4.705	8.82781	2.14968	3.57063	3.36008	up	0.0876827	0.896691	0.933689	no	chr21	17560702	17565611	+
circRNA11287	105.939	121.752	169.387	97.3056	103.711	65.2028	115.363	103.759	225.617	83.3295	118.654	119.619	down	-0.0116831	0.976228	0.984891	no	chr21	25891722	25911962	-
circRNA11288	70.7733	76.3878	103.941	58.6691	72.5826	38.0103	75.8697	62.5209	125.596	52.6715	70.9337	76.4708	down	-0.108438	0.752619	0.83553	no	chr21	25897573	25911962	-
circRNA11289	11.0994	8.6594	12.6264	13.487	16.9091	8.33537	13.4231	11.8124	13.7009	10.8009	11.6145	12.5562	down	-0.112474	0.591212	0.712617	no	chr21	29048761	29050178	+
circRNA1129	8.61831	10.4417	13.6208	8.45317	9.62589	7.56489	13.956	18.5992	13.8671	13.4729	13.492	10.152	up	0.410346	0.143324	0.276425	no	chr7	102913086	103029418	-
circRNA11290	6.96145	7.43893	11.1036	11.5009	8.90117	3.26489	3.49367	1.57014	13.2999	3.19072	4.96387	9.18122	down	-0.887221	0.12177	0.248334	no	chr21	31958843	31983609	+
circRNA11291	16.5392	19.3249	21.083	19.2784	23.9486	17.3924	21.6634	20.9209	22.459	22.0947	20.9061	20.0348	up	0.0614124	0.584443	0.707163	no	chr21	32737254	32759269	-
circRNA11292	6.31984	6.8245	6.7755	6.4155	7.46855	10.5024	11.7278	11.2056	13.2214	10.1887	11.3692	6.76078	up	0.749866	0.000427312	0.0365628	no	chr21	33345246	33349543	+
circRNA11293	2.92067	4.00512	4.05895	2.3297	2.21434	1.59903	1.30374	2.88768	2.85515	2.35695	2.20051	3.10576	down	-0.497107	0.116462	0.240812	no	chr21	33856736	33886460	+
circRNA11294	90.3357	170.267	159.816	56.6006	47.1488	25.434	13.9561	37.3634	20.2949	17.3392	22.8775	104.834	down	-2.1961	0.032103	0.119078	yes	chr21	34102835	34103519	+
circRNA11295	11.068	12.8142	11.4664	7.69752	14.107	40.4601	19.1513	27.7549	9.46696	21.235	23.6137	11.4306	up	1.04672	0.0755261	0.1853	no	chr21	36263546	36270157	+
circRNA11296	3.85648	3.91426	3.75276	2.33429	5.12813	15.4861	6.59501	10.1716	4.24773	7.50851	8.80179	3.79718	up	1.21287	0.0582706	0.159421	no	chr21	36277975	36281611	+
circRNA11297	4.47745	5.59504	4.97619	4.70192	5.53644	8.07834	7.15073	8.64675	7.30013	6.90082	7.61535	5.05741	up	0.590513	0.000317131	0.0346622	no	chr21	36364093	36372531	+
circRNA11298	0.934456	0.650312	1.13002	0.595731	1.04351	2.24467	1.46815	2.1564	2.03639	1.08113	1.79735	0.870807	up	1.04544	0.0106539	0.0710266	yes	chr21	36402758	36409465	+
circRNA11299	5.47577	6.79072	6.88119	5.85223	6.44778	4.96127	5.61534	7.57441	6.68473	6.46063	6.25928	6.28954	down	-0.00695742	0.955822	0.971406	no	chr21	37108392	37147603	+
circRNA113	8.29082	8.8431	10.1095	9.51149	7.38726	6.10244	6.57643	7.00036	12.2504	6.57194	7.70032	8.82843	down	-0.197239	0.402291	0.550503	no	chr13	100301460	100368574	+
circRNA1130	15.4041	18.7777	20.1313	16.6976	20.7606	16.0484	29.5173	22.7129	28.2918	24.8054	24.2752	18.3543	up	0.403365	0.0674455	0.173655	no	chr7	105038126	105041023	+
circRNA11300	10.0805	10.1927	9.45627	9.22602	8.68659	11.7272	12.5672	12.0708	9.52186	11.1157	11.4006	9.52841	up	0.258798	0.0195409	0.09312	no	chr21	37238460	37240639	-
circRNA11301	2.57242	2.74762	3.76624	2.99005	3.49363	2.08255	3.13329	3.48468	3.35495	3.26376	3.06385	3.11399	down	-0.0234215	0.885704	0.926139	no	chr21	39209995	39225197	-
circRNA11302	3.1068	2.97506	3.10369	2.85028	3.74231	2.27243	3.12641	3.45651	3.33163	3.27582	3.09256	3.15563	down	-0.0291261	0.816331	0.880851	no	chr21	39247701	39274472	-
circRNA11303	3.73559	4.02526	4.12923	3.71674	4.82917	2.99158	4.28937	4.69724	4.49845	4.16282	4.12789	4.0872	up	0.0142932	0.913241	0.944126	no	chr21	39247701	39298582	-
circRNA11304	9.34872	9.02098	10.6752	9.73849	9.73644	8.19966	10.7094	13.5605	12.6289	10.218	11.0633	9.70396	up	0.189133	0.228324	0.376821	no	chr21	39390698	39393280	+
circRNA11305	67.8649	68.5265	48.6323	40.7623	14.9943	0	0	0	0.687953	0.0686773	0.151326	48.1561	down	-8.31391	0.00832409	0.0638352	yes	chr21	41489507	41494578	-
circRNA11306	12.084	11.1734	10.0957	11.759	14.5596	10.3643	10.6505	7.21962	7.39452	12.5836	9.64251	11.9343	down	-0.307637	0.11145	0.23424	no	chr21	44052280	44063785	+
circRNA11307	4.61783	5.6255	4.37693	3.79569	6.57669	4.55115	5.98414	6.49686	5.60158	5.01409	5.52956	4.99853	up	0.145662	0.405899	0.554336	no	chr21	45175730	45183510	+
circRNA11308	11.5896	11.5406	11.4882	9.68634	13.6899	12.7301	17.7538	18.9839	15.9481	13.5115	15.7855	11.5989	up	0.444606	0.0209752	0.0964876	no	chr21	45180330	45204736	+
circRNA11309	17.6694	16.4067	15.1848	14.03	16.568	15.9649	16.4455	16.2102	13.9334	14.2523	15.3613	15.9718	down	-0.0562246	0.476862	0.616893	no	chr21	46236829	46277717	-
circRNA1131	7.81054	8.05871	9.35808	7.9661	10.3977	8.92655	13.6134	14.3358	13.9546	13.9434	12.9548	8.71823	up	0.571375	0.0100063	0.0693917	no	chr7	105062164	105091314	+
circRNA11310	2.60821	2.8441	2.05126	2.17505	2.71135	1.80835	2.42203	2.31627	2.00103	2.19433	2.1484	2.47799	down	-0.205908	0.125027	0.252815	no	chr21	46349012	46389431	+
circRNA11311	1.28547	1.51778	1.1115	1.09623	1.5834	1.02135	1.24071	1.26374	1.12718	1.31221	1.19304	1.31888	down	-0.144671	0.310573	0.462891	no	chr21	46363480	46389431	+
circRNA11312	0.705033	1.11865	0.634519	0.703957	0.993517	0.619537	0.654188	0.740703	0.547375	0.844438	0.681248	0.831135	down	-0.286902	0.212562	0.359449	no	chr21	46363480	46367139	+
circRNA11313	13.0965	10.0271	9.71625	7.28729	18.6363	8.42798	12.5522	9.42882	10.9702	15.2945	11.3347	11.7527	down	-0.0522402	0.861082	0.910325	no	chr21	46504361	46511614	+
circRNA11314	11.2388	12.2541	10.2594	10.8985	14.6174	5.64518	8.15379	13.0657	11.2923	9.38557	9.50849	11.8537	down	-0.318043	0.161905	0.299979	no	chr7	865952	869516	+
circRNA11315	4.67698	6.07784	5.29289	4.98489	6.9748	7.82198	8.10476	14.4798	7.29112	8.809	9.30134	5.60148	up	0.73163	0.0459123	0.141601	no	chr7	2363632	2364529	+
circRNA11316	4.52135	5.56205	5.11578	4.41724	15.5694	1.81672	1.36332	11.5855	8.91346	5.53283	5.84236	7.03716	down	-0.268442	0.693299	0.792678	no	chr7	3950923	3962851	+
circRNA11317	13.2491	7.71784	5.89552	9.31802	14.0721	9.83068	9.11238	11.8373	4.91309	13.6256	9.8638	10.0505	down	-0.0270549	0.933052	0.957189	no	chr7	4781175	4781754	+
circRNA11318	10.3594	10.4878	9.53687	10.6141	10.9048	8.01542	7.9595	10.5502	8.525	11.573	9.32462	10.3806	down	-0.15477	0.230678	0.378875	no	chr7	5216563	5217187	+
circRNA11319	4.20132	4.66408	6.36323	4.49057	5.50316	5.66799	4.77619	7.01856	5.89089	6.73145	6.01702	5.04447	up	0.254346	0.121437	0.24785	no	chr7	5901657	5905269	+
circRNA1132	2.07302	2.13199	1.91861	1.58571	2.08346	1.87861	1.84878	2.21012	1.12171	2.91145	1.99413	1.95856	up	0.0259708	0.912269	0.943445	no	chr7	105638353	105643121	-
circRNA11320	0.207657	0.0578055	0.0489186	0.0283682	0	0.119716	0.163127	0.160725	0.0569619	0.110885	0.122283	0.0685498	up	0.835	0.237542	0.386438	no	chr7	5956005	5959078	-
circRNA11321	2.92743	2.62302	3.33695	2.36637	2.17327	1.89616	2.35324	3.08538	2.67896	3.08434	2.61962	2.68541	down	-0.0357865	0.83558	0.893609	no	chr7	5982824	5992057	-
circRNA11322	5.14648	6.85134	7.25288	6.005	4.4787	3.14151	2.40874	1.85109	3.51269	4.0931	3.00143	5.94688	down	-0.986484	0.00227495	0.0452184	no	chr7	6015146	6018045	+
circRNA11323	20.4273	19.3199	14.6104	15.8021	23.0862	26.4616	23.1144	30.8592	22.2109	29.6351	26.4563	18.6492	up	0.504498	0.00972324	0.0684837	no	chr7	6421727	6424835	-
circRNA11324	14.7469	14.4405	14.673	13.7888	21.3945	11.9782	13.1241	13.4857	14.252	17.5643	14.0809	15.8087	down	-0.166988	0.341806	0.492417	no	chr7	8003908	8071131	+
circRNA11325	5.92292	4.97048	5.62789	5.66612	8.35894	4.77002	4.56356	5.01651	4.63343	5.46406	4.88952	6.10927	down	-0.321308	0.105095	0.22594	no	chr7	8055436	8071131	+
circRNA11326	18.8092	33.0625	40.2998	25.5506	23.0042	25.0472	26.2912	39.454	35.6199	38.7605	33.0346	28.1452	up	0.231085	0.349795	0.49981	no	chr7	12224226	12229819	+
circRNA11327	65.8503	73.4246	80.9532	67.641	41.2926	19.0049	2.09347	30.7521	106.153	39.6461	39.5298	65.8323	down	-0.735854	0.224009	0.372186	no	chr7	12629101	12640517	+
circRNA11328	14.4508	17.9081	20.6708	15.4489	22.4772	9.97923	13.7677	37.4727	24.084	29.1696	22.8947	18.1912	up	0.331773	0.412923	0.560192	no	chr7	16216066	16406337	-
circRNA11329	3.9065	4.54104	4.91279	4.86152	5.79846	4.94123	7.14269	8.54787	6.32684	7.39925	6.87158	4.80406	up	0.516387	0.0221051	0.0991657	no	chr7	17834052	17875790	-
circRNA1133	2.09665	2.14631	2.60023	3.04904	3.39193	2.33948	2.94875	3.74289	2.67156	4.22549	3.18563	2.65683	up	0.261875	0.257117	0.406961	no	chr7	107281300	107283732	-
circRNA11330	3.20382	3.37923	3.97096	3.84652	3.87733	3.91691	5.00487	6.22825	4.7224	5.23484	5.02145	3.65557	up	0.458009	0.0181538	0.0898409	no	chr7	17845595	17850964	-
circRNA11331	6.38831	7.27494	8.15103	7.65107	9.17192	7.97845	11.1136	13.2393	10.1506	11.425	10.7814	7.72745	up	0.48048	0.019869	0.0939183	no	chr7	17845595	17868490	-
circRNA11332	7.71534	7.96691	8.77513	8.58218	10.7683	9.00903	12.2459	14.9295	12.0236	13.3527	12.3121	8.76157	up	0.490819	0.0177771	0.0889373	no	chr7	17845595	17893434	-
circRNA11333	1.79424	4.05704	2.58075	2.35621	7.74272	4.95004	6.74804	4.17801	3.15339	4.539	4.71369	3.70619	up	0.346921	0.441978	0.585927	no	chr7	18590336	18666476	+
circRNA11334	5.41799	4.89108	8.4472	5.70595	7.27215	17.5112	3.44999	16.0821	41.1783	11.0681	17.858	6.34687	up	1.49245	0.143132	0.276208	no	chr7	20154193	20170778	-
circRNA11335	1.06557	0.939308	1.05429	1.21307	9.50756	3.89063	3.13902	5.40667	18.7474	10.0167	8.24009	2.75596	up	1.58011	0.148568	0.283181	no	chr7	22308339	22318037	-
circRNA11336	4.45995	4.24374	4.66105	4.18289	4.36338	4.83905	5.50012	7.21425	5.91239	4.39996	5.57315	4.3822	up	0.346839	0.0696792	0.176903	no	chr7	23117834	23152209	+
circRNA11337	1.66912	1.38521	2.85198	1.73692	3.11895	1.67256	2.07379	2.16173	0.764058	4.45769	2.22597	2.15243	up	0.048464	0.919861	0.948517	no	chr7	24641716	24668660	+
circRNA11338	17.3673	19.6831	23.5051	10.1407	12.5591	13.8869	11.2077	14.0059	13.8873	19.7285	14.5433	16.6511	down	-0.195262	0.475764	0.615893	no	chr7	24815059	24834736	-
circRNA11339	22.5548	25.6122	31.958	12.3223	15.6691	18.9646	16.3632	21.6226	21.0854	25.5306	20.7133	21.6233	down	-0.0620307	0.820358	0.883274	no	chr7	24842279	24861769	-
circRNA1134	2.5659	4.12079	3.54926	3.00197	3.33263	3.24299	4.11749	5.16018	3.89822	3.42536	3.96885	3.31411	up	0.260099	0.165321	0.304392	no	chr7	112286873	112287074	+
circRNA11340	32.9392	41.4806	43.7739	22.2916	25.3607	31.6172	23.7438	27.9338	27.5948	38.7068	29.9193	33.1692	down	-0.148768	0.533328	0.66614	no	chr7	24861613	24892621	-
circRNA11341	51.2102	53.64	63.0194	55.1871	69.0231	89.5233	93.2539	116.144	50.0188	100.739	89.9357	58.416	up	0.622531	0.0428614	0.137013	no	chr7	26684736	26727006	-
circRNA11342	6.36786	6.07705	4.88892	8.05099	5.07004	4.07249	5.99516	8.07262	4.12726	6.41469	5.73644	6.09097	down	-0.0865158	0.717187	0.810631	no	chr7	30045085	30055342	+
circRNA11343	7.13033	5.91008	6.52541	5.66088	5.49287	3.13144	4.79973	4.73869	6.04692	6.07003	4.95736	6.14392	down	-0.309586	0.101489	0.220873	no	chr7	30778432	30782212	+
circRNA11344	16.7519	8.56696	3.83574	11.8472	6.62837	2.51165	10.6841	10.5362	3.0259	3.97131	6.14582	9.52604	down	-0.632271	0.27672	0.427523	no	chr7	31837180	31850741	-
circRNA11345	6.30575	6.44837	6.4838	6.0767	7.85993	8.87953	8.72889	13.0264	8.2299	10.5861	9.89016	6.63491	up	0.575918	0.0174721	0.0884231	no	chr7	32544694	32570154	+
circRNA11346	19.7888	22.6026	23.1812	19.2154	19.2593	13.1787	21.1866	28.9541	30.0781	14.022	21.4839	20.8095	up	0.0460148	0.862212	0.910738	no	chr7	32974617	32988652	+
circRNA11347	53.0235	60.2187	57.079	52.3588	62.4414	43.522	62.2908	91.0137	73.3309	72.1229	68.4561	57.0243	up	0.263602	0.218905	0.366337	no	chr7	33533954	33604975	+
circRNA11348	15.4601	16.3576	15.4923	15.6544	17.1997	27.0439	26.728	25.7015	18.7728	25.6167	24.7726	16.0328	up	0.627715	0.00380007	0.0501835	no	chr7	38207447	38219660	+
circRNA11349	1.24683	1.71962	1.22161	1.77298	1.42778	0.579944	1.31337	0.760332	1.06491	0.295063	0.802723	1.47776	down	-0.880442	0.016127	0.0851545	no	chr7	42023468	42026412	-
circRNA1135	19.4503	22.4159	18.3122	22.277	22.3521	20.4656	22.1877	25.7912	19.417	25.5593	22.6842	20.9615	up	0.113943	0.306886	0.458841	no	chr7	112286873	112296311	+
circRNA11350	121.9	108.91	115.007	137.616	106.886	64.4029	75.8088	75.5488	74.0253	111.03	80.1631	118.064	down	-0.558554	0.00573941	0.0565627	no	chr7	44645327	44666851	+
circRNA11351	62.7435	59.9116	58.2	65.3546	61.5324	81.5155	74.3477	107.561	59.6079	93.0511	83.2167	61.5484	up	0.435152	0.0556791	0.155686	no	chr7	47344755	47369621	-
circRNA11352	20.0454	18.4117	16.1543	20.7131	18.7844	20.9058	20.1542	28.4784	15.43	21.3607	21.2658	18.8218	up	0.176133	0.322821	0.474421	no	chr7	47396800	47400914	-
circRNA11353	0.141383	0.052476	0.166531	0.540806	0.341029	0.326034	1.30193	0.401243	0.232695	0.60397	0.573175	0.248445	up	1.20605	0.178278	0.319482	no	chr7	47792627	47800879	-
circRNA11354	12.2611	12.0176	16.6391	8.92554	8.13484	2.74342	4.52968	3.3182	4.79803	6.18096	4.31406	11.5956	down	-1.42647	0.00569955	0.0564955	yes	chr7	51083058	51085304	-
circRNA11355	0.622425	0.556922	0.540875	0.590871	0.781312	1.03805	0.698505	1.25354	0.974327	1.27435	1.04775	0.618481	up	0.760499	0.0115738	0.0735105	no	chr7	65755780	65756574	+
circRNA11356	6.15432	6.03571	5.99582	5.7576	4.46302	5.83756	4.15733	6.10765	4.43807	4.27562	4.96325	5.6813	down	-0.194935	0.207656	0.353709	no	chr7	66771883	66775393	+
circRNA11357	18.3117	17.594	20.3491	19.2745	16.5534	23.9213	19.4293	26.6444	22.4149	21.4749	22.777	18.4165	up	0.306574	0.0186967	0.091074	no	chr7	66941848	66948694	+
circRNA11358	53.6821	57.3462	63.9107	55.0878	63.4087	60.2889	65.6364	106.264	63.5342	89.0969	76.9641	58.6871	up	0.391142	0.109911	0.232333	no	chr7	67098541	67195337	+
circRNA11359	8.49995	23.2986	14.1587	21.268	27.2062	7.6099	18.1503	15.2232	22.5351	23.8201	17.4677	18.8863	down	-0.112649	0.757405	0.838919	no	chr7	72713621	72744601	-
circRNA1136	4.75478	5.04102	9.39031	7.45666	10.337	14.1867	12.6589	23.3195	24.7349	15.913	18.1626	7.39596	up	1.29616	0.00836144	0.0638352	yes	chr7	116699071	116700284	+
circRNA11360	15.7311	17.6082	13.6239	15.9007	19.6474	14.1285	12.4643	14.5436	13.1283	16.2747	14.1079	16.5022	down	-0.226162	0.0875303	0.201658	no	chr7	72777416	72815481	-
circRNA11361	36.2188	39.539	40.8785	33.5324	45.692	26.9996	28.2645	44.7802	23.6463	30.0915	30.7564	39.1721	down	-0.348941	0.0899267	0.204711	no	chr7	73190066	73191554	+
circRNA11362	6.46549	6.61452	7.76765	7.05927	10.0915	6.93261	10.1805	8.77454	7.95592	11.8097	9.13066	7.59969	up	0.264778	0.196981	0.34133	no	chr7	73459536	73470483	-
circRNA11363	7.59864	7.06726	7.07305	6.08997	8.93325	6.59137	8.55179	8.42042	8.16177	9.14155	8.17338	7.35243	up	0.152711	0.229556	0.377931	no	chr7	73476868	73489391	-
circRNA11364	18.0072	18.282	20.7415	20.2738	19.4868	16.8489	16.2939	19.0383	17.2433	24.5426	18.7934	19.3582	down	-0.0427218	0.738714	0.825713	no	chr7	73492800	73498698	-
circRNA11365	9.91937	8.60549	9.24491	7.578	5.72995	6.91228	5.29573	6.55945	5.8646	6.171	6.16061	8.21554	down	-0.415282	0.0455699	0.141017	no	chr7	73686636	73687095	+
circRNA11366	2.14198	2.60188	2.82115	2.55376	2.97474	5.89369	3.13587	4.37078	2.80428	5.92687	4.4263	2.6187	up	0.757248	0.0504264	0.148037	no	chr7	74105875	74106243	+
circRNA11367	9.7568	11.3876	9.37714	9.8809	14.7631	14.4195	11.9708	18.1652	12.4756	17.1908	14.8444	11.0331	up	0.428076	0.0443742	0.139431	no	chr7	77011880	77015855	+
circRNA11368	3.03245	4.49817	3.94639	3.4433	3.60872	4.23151	3.2637	5.32831	4.14058	5.28225	4.44927	3.70581	up	0.263782	0.151494	0.286685	no	chr7	77241691	77280653	+
circRNA11369	2.04614	1.81181	3.15668	3.55617	4.21692	4.34986	6.87439	8.68884	7.57533	5.68914	6.63551	2.95754	up	1.16581	0.00467868	0.0534592	yes	chr7	77597842	77600806	+
circRNA1137	24.2003	23.1961	33.7837	21.9968	34.0192	2.1529	10.9195	24.9131	11.8707	34.2418	16.8196	27.4392	down	-0.706096	0.143806	0.27697	no	chr7	117745831	117757970	-
circRNA11370	1.5886	2.83668	2.27279	2.04529	3.61379	3.28363	3.58151	4.10857	1.7537	3.43453	3.23239	2.47143	up	0.387254	0.187438	0.330291	no	chr7	77920279	77922778	+
circRNA11371	1144.05	893.976	381.015	812.684	959.231	147.743	83.8638	186.67	99.5165	62.28	116.015	838.191	down	-2.85297	0.00411507	0.0515616	yes	chr7	78627120	79007206	-
circRNA11372	3.68082	3.38808	2.84572	4.47216	3.89361	2.51168	0.666157	7.70641	2.81682	1.65458	3.07113	3.65608	down	-0.251527	0.661391	0.768296	no	chr7	80789306	80805758	-
circRNA11373	19.8535	22.6396	19.1564	22.1262	22.5114	11.6186	53.3365	13.9095	14.269	8.80548	20.3878	21.2574	down	-0.0602592	0.921778	0.949695	no	chr7	82060428	82084900	-
circRNA11374	5.71971	8.24008	11.7835	6.88574	7.76827	4.5585	6.77968	7.89297	9.7049	10.1072	7.80866	8.07945	down	-0.0491824	0.8553	0.906919	no	chr7	87361728	87391712	+
circRNA11375	20.5391	22.9447	39.0189	20.6864	16.9099	7.35223	3.97218	8.83672	2.65132	17.9495	8.15239	24.0198	down	-1.55893	0.0116731	0.073595	yes	chr7	87553761	87561387	-
circRNA11376	7.93976	9.08441	10.6645	9.79133	9.97419	9.12555	11.724	13.7979	9.96919	14.1575	11.7548	9.49084	up	0.308647	0.0889639	0.203385	no	chr7	92201307	92226682	-
circRNA11377	1.36676	1.82783	1.90144	1.53941	1.4568	1.43814	1.35617	2.31599	1.17586	2.289	1.71503	1.61845	up	0.083624	0.729447	0.819595	no	chr7	92221902	92222978	-
circRNA11378	2.10076	2.35654	2.48102	2.19241	2.29225	2.29005	3.10054	2.47548	2.47639	2.88187	2.64487	2.2846	up	0.211256	0.0736063	0.182896	no	chr7	92294889	92307656	+
circRNA11379	3.80482	3.61548	4.26559	4.22136	4.3447	3.57976	5.50677	4.04298	3.65946	5.54694	4.46718	4.05039	up	0.141305	0.410075	0.557587	no	chr7	92294889	92343232	+
circRNA1138	3.31046	3.19629	4.26178	2.83201	5.472	0.208453	1.06926	2.4068	1.82498	4.22195	1.94629	3.81451	down	-0.97077	0.0579482	0.15902	no	chr7	117791128	117792781	-
circRNA11380	3.77505	3.5827	4.39662	4.35905	4.33915	3.70319	5.65107	4.2091	3.7301	5.80971	4.62063	4.09051	up	0.175809	0.330872	0.482162	no	chr7	92294889	92362273	+
circRNA11381	3.32625	3.27197	3.63122	3.65023	3.72684	3.29186	4.6847	3.41771	3.1145	4.52762	3.80728	3.5213	up	0.11265	0.445744	0.589343	no	chr7	92307359	92327900	+
circRNA11382	9.87929	10.229	12.3881	10.2046	11.9542	8.35833	9.23843	14.1944	12.4058	12.5371	11.3468	10.931	up	0.0538566	0.743651	0.829333	no	chr7	92489293	92493129	-
circRNA11383	3.31517	5.01032	4.60185	3.84755	4.22234	4.61738	4.79701	7.82835	5.93912	5.07575	5.65152	4.19945	up	0.42844	0.0706658	0.178296	no	chr7	92529476	92534970	+
circRNA11384	6.32169	6.72348	6.86615	6.31048	8.52242	5.48818	6.63602	8.77901	6.51033	7.69632	7.02197	6.94885	up	0.0151032	0.918945	0.947901	no	chr7	93252653	93323732	+
circRNA11385	6.21185	6.16178	6.86222	6.2851	7.74035	5.06924	6.48611	8.1988	5.98285	7.24331	6.59606	6.65226	down	-0.0122398	0.929751	0.954713	no	chr7	93276165	93323732	+
circRNA11386	2.89775	2.76991	3.18972	3.05276	3.32188	2.42502	2.8556	3.9433	2.89318	3.42554	3.10853	3.04641	up	0.0291226	0.833113	0.892116	no	chr7	93291703	93311272	+
circRNA11387	0.998187	1.16076	1.30014	1.35687	1.20955	0.824173	1.18867	1.70973	1.00927	1.41939	1.23025	1.2051	up	0.029792	0.88596	0.926267	no	chr7	93291703	93297243	+
circRNA11388	10.5451	11.5136	12.9775	10.091	11.7626	7.41608	11.5614	9.07984	19.3919	10.1921	11.5282	11.378	up	0.0189297	0.947053	0.965889	no	chr7	94588689	94629841	-
circRNA11389	5.82862	5.40376	5.65827	5.07381	6.09716	5.22115	5.20217	7.76142	5.55882	6.03161	5.95503	5.61232	up	0.0855116	0.528965	0.662489	no	chr7	98903379	98912213	+
circRNA1139	1.39765	2.63137	2.57371	3.14159	6.06482	2.60576	2.92237	3.51424	4.40482	2.49221	3.18788	3.16183	up	0.011838	0.976777	0.985057	no	chr7	121097699	121142141	+
circRNA11390	11.2965	14.3173	17.6577	12.8542	15.7506	14.3659	12.6152	13.7324	15.284	15.2223	14.244	14.3752	down	-0.0132367	0.917611	0.947289	no	chr7	99403398	99404953	-
circRNA11391	6.28117	6.73809	7.29465	6.84367	6.38672	3.9413	8.58479	7.66293	6.57672	8.74299	7.10175	6.70886	up	0.0821062	0.682599	0.78522	no	chr7	100075135	100077433	-
circRNA11392	20.3911	21.4153	23.8262	22.1338	35.1524	23.7178	31.6065	39.7325	32.3637	37.96	33.0761	24.5838	up	0.428083	0.0611874	0.164042	no	chr7	104136781	104165282	-
circRNA11393	12.3791	14.4188	14.3308	15.8447	17.8281	15.5932	23.0926	23.4029	24.8439	22.041	21.7947	14.9603	up	0.54284	0.00934107	0.0672597	no	chr7	105073619	105102194	+
circRNA11394	5.13065	5.90542	5.66329	4.85355	6.43471	7.38547	6.57705	9.26072	5.87473	10.6317	7.94593	5.59752	up	0.505428	0.0533089	0.15254	no	chr7	105536565	105542649	+
circRNA11395	4.05587	4.10528	4.56743	4.15868	4.87413	4.52956	5.35809	6.208	3.81512	7.79372	5.5409	4.35228	up	0.348349	0.162204	0.300266	no	chr7	105624075	105643121	-
circRNA11396	6.34078	4.10756	4.01467	7.16439	4.96135	3.6706	9.20511	13.686	3.64039	13.613	8.76302	5.31775	up	0.720614	0.202789	0.347724	no	chr7	105984192	106020544	+
circRNA11397	18.4194	26.3806	24.4816	18.5425	23.5963	33.0682	30.739	45.3825	36.9411	28.2491	34.876	22.2841	up	0.646222	0.00960329	0.0681279	no	chr7	107179879	107182601	+
circRNA11398	32.2498	32.5382	30.0303	30.9275	39.3299	38.9084	41.8684	66.9331	42.5061	42.4855	46.5403	33.0151	up	0.495352	0.0560289	0.156245	no	chr7	107189292	107196151	+
circRNA11399	42.1897	47.7502	56.945	41.9709	31.8559	14.6495	20.5546	25.591	17.336	18.102	19.2466	44.1423	down	-1.19756	0.00188522	0.0436115	yes	chr7	107929064	107932377	-
circRNA114	26.3046	29.0054	28.7945	28.5226	23.0815	20.2129	19.6156	20.2931	36.4344	20.2673	23.3647	27.1417	down	-0.216183	0.325145	0.47645	no	chr13	100301460	100425731	+
circRNA1140	39.4441	34.956	33.8755	26.3726	16.3554	8.14619	13.4274	9.95462	21.2472	9.18017	12.3911	30.2007	down	-1.28528	0.00786433	0.0628379	yes	chr7	122345574	122393582	-
circRNA11400	41.4987	44.715	46.9183	35.9058	25.2861	12.4444	18.2645	20.134	14.5594	10.7482	15.2301	38.8648	down	-1.35154	0.00181192	0.0434304	yes	chr7	107935415	107940358	-
circRNA11401	71.83	66.2181	81.7152	58.0312	41.7682	13.3736	27.8459	23.0286	18.0691	12.6323	18.9899	63.9126	down	-1.75087	0.00126042	0.041835	yes	chr7	107980609	107998492	-
circRNA11402	0.842326	0.908605	2.00084	0.402748	1.35451	0.242804	0.33085	3.67631	0.0770189	1.38685	1.14276	1.10181	up	0.0526583	0.957106	0.972236	no	chr7	114628540	114631705	+
circRNA11403	15.0647	13.9938	18.1275	13.5251	11.9273	10.9831	22.4022	28.3007	23.8132	26.0326	22.3064	14.5277	up	0.618648	0.058621	0.159994	no	chr7	120806549	120815803	-
circRNA11404	9.62382	9.20296	7.38327	7.76935	4.76798	1.66446	3.17633	2.41199	5.4414	2.23606	2.98605	7.74948	down	-1.37586	0.00263391	0.0465657	yes	chr7	122438341	122451475	-
circRNA11405	27.1619	34.3487	33.3178	32.9298	19.9597	7.01748	14.4909	9.95256	19.5491	9.44508	12.091	29.5436	down	-1.28891	0.00119593	0.0412806	yes	chr7	122554550	122621717	-
circRNA11406	7.88177	9.84573	10.0945	8.54934	6.16369	1.72259	3.72851	3.06788	6.37069	2.57802	3.49354	8.507	down	-1.28396	0.00156938	0.0431249	yes	chr7	122615181	122629328	-
circRNA11407	14.6293	17.5418	29.8194	11.0623	19.0058	12.8135	10.4132	20.926	17.1469	18.7869	16.0173	18.4117	down	-0.200996	0.539639	0.671405	no	chr7	123479795	123496906	-
circRNA11408	25.9092	22.9911	26.0795	28.5251	36.8653	30.3704	31.83	58.0066	40.7173	44.6988	41.1246	28.074	up	0.550766	0.0585047	0.159747	no	chr7	124892266	124915646	-
circRNA11409	11.9466	13.3924	11.9922	8.31336	10.8418	6.51925	7.32642	6.50871	20.8554	4.91786	9.22552	11.2973	down	-0.292273	0.529699	0.663039	no	chr7	125080712	125125977	+
circRNA1141	62.6097	92.9095	98.6707	78.9912	134.866	138.628	153.997	151.466	103.129	204.949	150.434	93.6094	up	0.684406	0.0254231	0.106265	no	chr7	127807484	127844424	+
circRNA11410	4.33083	6.11531	5.0338	4.54568	7.49586	4.13823	6.14203	4.37429	5.58396	5.68262	5.18423	5.5043	down	-0.0864295	0.663472	0.769688	no	chr7	129677632	129690546	+
circRNA11411	3.7067	4.52509	4.70094	5.27954	4.30194	5.61379	8.03467	10.1547	4.39969	7.82498	7.20558	4.50284	up	0.678278	0.052775	0.151786	no	chr7	130026158	130049144	-
circRNA11412	325.184	407.828	380.033	364.818	465.901	463.028	429.412	642.387	411.043	656.628	520.5	388.753	up	0.421045	0.068637	0.175093	no	chr7	130945720	131052555	-
circRNA11413	136.696	162.339	142.461	161.301	189.539	208.161	173.413	247.687	175.169	256.305	212.147	158.467	up	0.420882	0.0343379	0.122585	no	chr7	130984053	131052555	-
circRNA11414	37.994	41.5616	49.8378	43.4163	42.3515	31.3967	40.3861	49.2672	45.2156	47.5194	42.757	43.0323	down	-0.00925801	0.943574	0.963864	no	chr7	131466276	131478677	+
circRNA11415	1.06404	0.696933	1.83019	0.615638	2.02976	0.685593	0.163896	0.113038	0.394888	0.183822	0.308247	1.24731	down	-2.01666	0.0285098	0.112139	yes	chr7	132507506	132508779	-
circRNA11416	105.397	109.565	130.107	120.195	138.228	129.202	145.105	194.753	142.701	190.302	160.412	120.698	up	0.410378	0.0383962	0.129585	no	chr7	133305877	133917738	+
circRNA11417	1.4034	2.75878	2.75662	2.18699	2.32541	1.26844	2.92617	5.52949	2.87282	4.81428	3.48224	2.28624	up	0.607038	0.196707	0.341059	no	chr7	134163397	134201576	+
circRNA11418	12.253	12.8722	13.8769	10.1107	13.5938	8.62311	11.5248	11.3362	9.06611	10.8384	10.2777	12.5413	down	-0.287169	0.0363704	0.126162	no	chr7	138504290	138515359	+
circRNA11419	3.2313	4.48299	6.40891	2.64858	1.50855	0.360555	0	0	1.11511	0	0.295134	3.65607	down	-3.63085	0.0140739	0.0798852	yes	chr7	138644717	138649137	-
circRNA1142	4.31618	4.32385	3.76927	4.31952	3.79272	3.97456	4.40168	5.50446	4.92319	5.14472	4.78972	4.10431	up	0.222802	0.0649273	0.169918	no	chr7	129014979	129018157	-
circRNA11420	37.9201	42.2279	27.6469	29.3902	13.2223	0.017212	0.0178693	0.0132046	5.8942	0.0159424	1.19169	30.0815	down	-4.6578	0.00356904	0.0495831	yes	chr7	138715764	138739633	-
circRNA11421	12.6862	16.0589	8.79177	10.8777	4.23933	0.0127981	0	0.0229096	1.8447	0	0.376082	10.5308	down	-4.80742	0.00601482	0.0574449	yes	chr7	138745123	138749317	-
circRNA11422	11.2294	8.5316	11.3757	12.9207	10.5665	2.69743	5.43541	5.7656	3.01809	7.63546	4.9104	10.9248	down	-1.15369	0.00103059	0.0397724	yes	chr7	138871157	138909121	-
circRNA11423	3.33313	3.59407	3.28809	3.36986	3.51741	2.59149	3.15491	4.06067	3.70397	3.59755	3.42172	3.42051	up	0.000508442	0.996495	0.997735	no	chr7	139251956	139284574	+
circRNA11424	2.5002	3.3775	2.90345	2.71595	3.08984	2.06533	2.62869	3.36419	3.05109	2.93348	2.80856	2.91739	down	-0.0548482	0.695435	0.794064	no	chr7	139279318	139284574	+
circRNA11425	3.93578	4.72298	4.71338	3.29116	8.46359	8.43469	8.39766	8.87259	4.76417	11.6896	8.43174	5.02538	up	0.746598	0.0447151	0.139974	no	chr7	140041644	140058034	-
circRNA11426	5.81808	4.46413	5.0771	4.5268	6.92782	7.54687	5.03737	6.57759	7.72251	7.21493	6.81986	5.36279	up	0.346758	0.0614881	0.164633	no	chr7	140101951	140111184	-
circRNA11427	5.24948	5.45354	4.98804	5.13209	7.33087	7.65072	6.82063	7.42858	8.21445	7.3734	7.49756	5.6308	up	0.41308	0.00855443	0.0641917	no	chr7	140119113	140139190	-
circRNA11428	1.57188	4.15828	5.18611	1.54323	1.97311	0.756166	2.53553	2.52786	3.243	1.02193	2.0169	2.88652	down	-0.517195	0.362583	0.511761	no	chr7	140585589	140605806	-
circRNA11429	0.75133	4.30332	4.8377	1.14163	1.38913	0.59762	1.52426	1.7048	2.50231	1.03185	1.47217	2.48462	down	-0.755081	0.320374	0.472058	no	chr7	140585589	140587780	-
circRNA1143	11.4071	7.66373	13.0324	9.11777	7.98112	3.16168	5.01185	8.31969	3.36575	5.63242	5.09828	9.84043	down	-0.948712	0.00942909	0.0675546	no	chr7	129205203	129206587	+
circRNA11430	0.782564	2.09701	2.46421	0.772125	1.16148	0.468838	1.02888	1.06784	1.55346	0.311978	0.886201	1.45548	down	-0.715787	0.213191	0.360075	no	chr7	140601403	140605806	-
circRNA11431	7.24312	7.92687	8.47742	7.26726	8.39628	5.61461	8.00067	8.95463	7.9475	9.37529	7.97854	7.86219	up	0.0211937	0.874777	0.919477	no	chr7	140739812	140808995	-
circRNA11432	8.56276	9.47412	10.1382	8.43224	9.78604	6.61923	9.41402	10.5955	9.45053	11.1782	9.4515	9.27867	up	0.0266247	0.846953	0.901419	no	chr7	140739812	140800481	-
circRNA11433	8.34362	9.01207	9.78407	7.95908	8.79391	6.15716	8.92966	9.71461	8.60487	10.2445	8.73016	8.77855	down	-0.00797457	0.952127	0.969428	no	chr7	140749287	140794467	-
circRNA11434	3.71557	4.29879	4.44152	4.12071	4.2599	3.12875	4.16321	4.83604	4.76094	5.0531	4.38841	4.1673	up	0.0745851	0.575313	0.699449	no	chr7	140776912	140801560	-
circRNA11435	3.97945	5.02768	5.04125	4.19665	4.37039	3.38419	4.65841	5.1397	5.36262	5.48218	4.80542	4.52308	up	0.0873554	0.543456	0.674607	no	chr7	140781576	140794467	-
circRNA11436	2.45765	2.7542	2.66201	2.88735	3.18724	2.05918	2.74588	3.02965	2.96614	3.0322	2.76661	2.78969	down	-0.0119868	0.919737	0.948517	no	chr7	140800362	140808995	-
circRNA11437	14.1797	15.7336	16.3967	14.1067	8.27127	9.91386	10.5627	20.4093	9.03382	12.3004	12.444	13.7376	down	-0.14268	0.622262	0.736907	no	chr7	151564078	151568842	-
circRNA11438	28.1649	20.692	32.9921	45.8756	21.4495	22.0622	23.9836	25.1571	23.3243	25.5533	24.0161	29.8348	down	-0.312996	0.27646	0.42728	no	chr7	152094190	152108287	+
circRNA11439	3.40498	4.03313	3.95767	3.37363	4.0384	3.43739	3.73134	4.14965	3.89946	4.23435	3.89044	3.76156	up	0.0485996	0.556656	0.685257	no	chr7	152167146	152199459	-
circRNA1144	2.21501	2.28745	3.25518	2.86437	2.7191	2.50548	3.48005	5.14627	4.30795	4.04731	3.89741	2.66822	up	0.546637	0.0464098	0.142395	no	chr7	130175512	130178527	-
circRNA11440	15.5155	14.2594	16.8949	14.2404	18.1109	13.5879	17.7659	18.0796	18.011	18.0604	17.1009	15.8042	up	0.113765	0.296821	0.449082	no	chr7	152238707	152250966	-
circRNA11441	17.5639	17.1479	16.7227	15.2493	17.9022	14.1892	15.8034	22.4061	17.3753	18.2295	17.6007	16.9172	up	0.0571402	0.659994	0.767186	no	chr7	152800531	152825122	+
circRNA11442	13.0649	10.7283	13.1039	14.3827	13.1726	9.91313	16.0255	16.3661	14.6198	17.0015	14.7852	12.8905	up	0.197848	0.230523	0.378747	no	chr7	156796389	156826744	-
circRNA11443	18.2824	18.6488	17.7924	17.6443	21.3174	16.1744	20.1642	20.7702	19.8551	23.7342	20.1396	18.7371	up	0.104141	0.347163	0.497346	no	chr7	157183878	157216971	+
circRNA11444	6.94788	7.55039	7.33728	6.37227	8.07328	6.04026	8.07599	8.20984	7.89685	8.68721	7.78203	7.25622	up	0.100929	0.36155	0.510846	no	chr7	157201721	157225539	+
circRNA11445	5.52836	6.30279	6.22108	5.1055	6.48942	4.94634	6.45209	6.94433	6.18033	6.89105	6.28283	5.92943	up	0.0835207	0.454919	0.597189	no	chr7	157207398	157225539	+
circRNA11446	21.9714	26.23	24.0743	28.8489	23.4413	26.6815	23.046	21.4227	28.4726	27.0016	25.3249	24.9132	up	0.0236465	0.823439	0.885316	no	chr7	157358547	157367483	+
circRNA11447	7.78299	9.70575	9.25049	7.25528	7.29872	7.74476	11.2337	12.5511	11.6326	12.9192	11.2163	8.25865	up	0.441616	0.0293519	0.113739	no	chr7	158901739	158923733	+
circRNA11448	9.41006	11.1324	9.91242	9.81297	10.1925	10.5432	10.3353	8.31313	9.78373	12.0818	10.2114	10.0921	up	0.0169644	0.865476	0.912735	no	chr6	2263601	2273417	+
circRNA11449	9.75293	11.1131	9.5723	13.1052	13.8627	14.5404	14.0385	9.71138	9.99281	13.8456	12.4257	11.4812	up	0.114053	0.510305	0.647168	no	chr6	3076764	3085408	+
circRNA1145	9.70042	11.9364	14.0308	12.8647	13.9902	11.8819	12.959	16.399	16.2269	16.2656	14.7465	12.5045	up	0.237924	0.113023	0.236472	no	chr7	131375424	131399433	+
circRNA11450	7.37537	4.71943	6.39164	8.61165	14.5266	23.7309	8.68602	18.5781	32.7805	6.45891	18.0469	8.32494	up	1.11624	0.117682	0.242491	no	chr6	6151813	6182141	-
circRNA11451	13.1471	18.5962	23.7372	20.3577	16.982	29.257	27.0849	25.1546	26.258	22.0039	25.9517	18.5641	up	0.483315	0.0102244	0.0700234	no	chr6	7297923	7310029	-
circRNA11452	7.72791	13.1745	23.2911	3.93372	5.39029	3.27755	3.64116	4.45745	3.90885	8.05602	4.6682	10.7035	down	-1.19714	0.163316	0.301703	no	chr6	7845140	7862498	+
circRNA11453	1.83839	2.71869	6.48263	0.879004	1.10859	0.927365	0.39113	0.948603	1.00857	1.13506	0.882145	2.60546	down	-1.56245	0.167161	0.305987	no	chr6	7861451	7862498	+
circRNA11454	63.3768	83.8035	67.1083	20.761	37.5257	25.5989	27.2481	25.9337	15.3515	18.8989	22.6062	54.5151	down	-1.26993	0.0453506	0.140757	yes	chr6	13205815	13230193	+
circRNA11455	12.3096	10.7803	13.5625	15.4472	14.1015	16.1086	20.1719	14.3757	11.4746	21.2056	16.6673	13.2402	up	0.332094	0.138033	0.269642	no	chr6	15651313	15660521	-
circRNA11456	0.989026	1.31635	1.85663	1.92534	2.00222	2.7529	2.45222	3.01894	2.27636	2.72313	2.64471	1.61791	up	0.708976	0.00353444	0.0494165	no	chr6	18159883	18166378	+
circRNA11457	49.3202	49.1404	64.2073	52.5412	62.3524	67.3424	86.0863	89.7295	79.4164	79.9595	80.5068	55.5123	up	0.536304	0.00114624	0.0412806	no	chr6	21065048	21108463	+
circRNA11458	12.4395	17.3039	31.0194	14.1753	34.1065	8.06613	20.0719	22.189	17.2889	9.42376	15.4079	21.8089	down	-0.501244	0.268328	0.418774	no	chr6	22020339	22110920	+
circRNA11459	0.803482	0.457004	0.936168	0.711985	1.80887	0.225347	0.41283	0.631976	0.979298	0.382663	0.526423	0.943501	down	-0.841803	0.163328	0.301703	no	chr6	22020339	22020542	+
circRNA1146	43.5433	43.6613	11.2214	25.3945	24.9216	3.98216	11.7194	9.25998	19.9811	9.82152	10.9528	29.7484	down	-1.44151	0.0353995	0.124644	yes	chr7	131508951	131511433	-
circRNA11460	5.06671	5.90968	6.15613	5.8711	5.89789	2.80546	3.9428	5.2276	4.68925	3.343	4.00162	5.7803	down	-0.530559	0.0117603	0.073595	no	chr6	24412222	24418578	+
circRNA11461	7.94486	6.52315	8.7078	5.18974	7.33591	4.27868	3.35566	3.83872	7.58616	4.77809	4.76746	7.14029	down	-0.582761	0.0395153	0.13136	no	chr6	25515675	25581439	+
circRNA11462	50.2492	20.5456	36.4576	122.453	56.1279	10.8521	23.0361	0.420379	0.48344	14.3265	9.82371	57.1666	down	-2.54083	0.051474	0.149907	no	chr6	25798783	25819915	-
circRNA11463	8.89801	9.42732	11.7943	10.9718	16.8702	14.3135	14.4853	11.9887	15.5317	16.87	14.6378	11.5923	up	0.336533	0.108417	0.230402	no	chr6	36524341	36540207	-
circRNA11464	1.65331	1.16828	1.28827	1.51731	1.34635	0.403253	1.33208	0.721854	1.08146	1.01866	0.91146	1.3947	down	-0.613707	0.0366389	0.126483	no	chr6	37650109	37652340	-
circRNA11465	7.37798	7.13005	5.64377	7.23584	6.63154	7.27175	4.36588	5.13697	5.35566	4.77411	5.38087	6.80384	down	-0.338508	0.048804	0.145716	no	chr6	41687094	41691235	-
circRNA11466	2.74425	2.57332	3.10863	2.75708	3.95903	2.07479	2.45759	2.13618	2.09055	2.14993	2.18181	3.02846	down	-0.473061	0.0245374	0.104539	no	chr6	42268154	42269848	-
circRNA11467	38.2405	40.2937	35.9455	34.7272	42.1354	39.6513	51.5139	49.2064	45.6001	51.0411	47.4026	38.2685	up	0.308809	0.0103557	0.0703619	no	chr6	42615071	42632904	+
circRNA11468	5.06885	7.20232	7.97871	7.21675	8.13713	6.86483	7.05225	7.99487	8.62696	7.63112	7.63401	7.12075	up	0.10041	0.447115	0.590483	no	chr6	42637011	42642481	+
circRNA11469	6.15269	7.15506	7.54012	5.03056	8.04662	7.01876	6.97728	5.30348	7.57966	7.78526	6.93289	6.78501	up	0.0311059	0.83642	0.894048	no	chr6	42822796	42852197	+
circRNA1147	42.2547	55.2495	50.2639	58.428	76.6527	62.6901	103.644	114.697	73.2069	69.2009	84.6878	56.5697	up	0.582124	0.0523548	0.151087	no	chr7	134932988	134960628	+
circRNA11470	8.46704	10.3826	7.65024	8.78498	7.62641	5.28294	5.47266	5.72389	7.08532	7.15388	6.14374	8.58226	down	-0.48224	0.00591239	0.0570681	no	chr6	42974003	42975038	-
circRNA11471	6.32244	8.00972	7.01135	7.68529	8.95653	6.32285	6.04786	6.22511	5.43688	7.78565	6.36367	7.59707	down	-0.255584	0.0712078	0.17929	no	chr6	43435751	43441960	+
circRNA11472	3.1656	4.4842	4.28349	4.55372	4.54	3.73365	4.55853	3.39919	4.07595	3.9875	3.95096	4.2054	down	-0.0900391	0.460724	0.602228	no	chr6	43533907	43548460	-
circRNA11473	4.66233	6.30998	5.5539	6.40207	5.18284	6.13083	5.90916	7.35984	7.63722	6.55446	6.7183	5.62222	up	0.256955	0.0493039	0.146393	no	chr6	44403809	44408632	+
circRNA11474	9.34232	8.45732	13.702	9.22041	7.60257	2.13669	4.85804	4.19489	11.3056	5.35339	5.56972	9.66493	down	-0.795153	0.0634374	0.16766	no	chr6	51744385	51870639	-
circRNA11475	9.8425	9.13635	14.1882	10.0306	8.61001	2.39219	5.52141	4.52381	11.5306	5.44861	5.88332	10.3615	down	-0.816534	0.043563	0.137986	no	chr6	51772702	51870639	-
circRNA11476	8.92458	8.26468	12.6279	8.83954	7.63268	2.07631	4.98992	4.19909	10.1754	4.82926	5.25399	9.25788	down	-0.817269	0.0409869	0.133855	no	chr6	51791236	51887245	-
circRNA11477	11.4294	10.9306	17.4624	11.0423	10.6343	2.40489	5.9176	5.19754	13.1413	6.52184	6.63664	12.2998	down	-0.89011	0.0351418	0.124192	no	chr6	51791236	52035721	-
circRNA11478	3.46323	3.96394	4.85996	3.32345	2.88386	0.542734	1.32074	1.25042	3.40899	2.03407	1.71139	3.69889	down	-1.11192	0.0117422	0.073595	yes	chr6	51847775	51856070	-
circRNA11479	10.5129	10.1692	16.2582	10.0976	9.93927	2.14666	5.34179	4.76786	12.0664	6.13153	6.09085	11.3955	down	-0.903743	0.0338345	0.12184	no	chr6	51847775	52035721	-
circRNA1148	4.61946	5.57469	4.7006	5.95402	7.14564	6.70015	8.32726	7.43051	8.28463	8.79598	7.90771	5.59888	up	0.49812	0.00507715	0.0547496	no	chr7	135597998	135617682	+
circRNA11480	16.4965	15.8502	25.8743	16.0606	15.6993	3.57121	8.82078	7.79847	19.5816	9.87482	9.92937	17.9962	down	-0.857916	0.0424326	0.136284	no	chr6	51867863	52022944	-
circRNA11481	15.8601	15.0781	24.2388	15.2833	15.0556	3.27553	8.44675	7.20209	17.8101	9.83685	9.31426	17.1032	down	-0.876753	0.0332365	0.12107	no	chr6	51906215	51960026	-
circRNA11482	10.8989	11.0289	17.5122	10.6989	10.8337	2.32738	5.622	4.83028	12.6142	6.55117	6.38901	12.1945	down	-0.93257	0.0293229	0.113739	no	chr6	51934110	52027896	-
circRNA11483	9.21543	9.24752	14.6512	8.83321	8.93277	1.75984	4.42963	3.88631	10.5891	5.39119	5.21122	10.176	down	-0.96548	0.0294643	0.113918	no	chr6	51959870	52035721	-
circRNA11484	36.8444	38.2863	43.0293	42.3024	48.27	50.7781	56.3383	47.1598	50.0238	61.4738	53.1547	41.7464	up	0.348545	0.00868626	0.0647041	no	chr6	57090811	57142095	+
circRNA11485	2.85903	3.95681	3.41361	3.18788	4.4224	3.9307	4.09272	3.80338	4.32515	4.49057	4.1285	3.56795	up	0.210524	0.12016	0.245918	no	chr6	57124734	57128840	+
circRNA11486	1.1643	2.11064	2.21764	2.23454	2.37458	3.36432	3.60721	5.66339	4.20642	5.09503	4.38727	2.02034	up	1.11873	0.00302611	0.047871	yes	chr6	57318437	57326045	+
circRNA11487	9.87476	16.8978	10.9839	7.52115	12.3174	6.83222	7.16708	9.13641	7.66887	5.96398	7.35371	11.519	down	-0.647469	0.0533028	0.15254	no	chr6	57924417	57930291	-
circRNA11488	23.1425	7.72442	24.9042	31.5157	54.1963	13.9822	4.40015	5.40266	6.39524	5.29564	7.09518	28.2966	down	-1.99572	0.0468349	0.14304	yes	chr6	61732682	62047994	-
circRNA11489	0.162569	0.169704	0.517011	0.499696	0.196066	0.246021	0.0957812	0	0.0334455	0	0.0750496	0.309009	down	-2.04173	0.0448544	0.140116	yes	chr6	61894635	61901371	-
circRNA1149	11.0665	11.0512	13.4534	9.68221	13.1876	7.5782	12.9031	11.9095	9.12186	12.5289	10.8083	11.6882	down	-0.112907	0.509046	0.645905	no	chr7	138504290	138538803	+
circRNA11490	2.6315	5.25421	6.27229	2.59144	7.67171	0.671226	2.49354	0.761957	7.26256	0.31844	2.30154	4.88423	down	-1.08553	0.156239	0.293053	no	chr6	68993768	69063036	+
circRNA11491	1.8884	1.51751	2.52646	1.37262	2.69288	0.708665	0.671752	0.275775	4.16356	0.371005	1.23815	1.99957	down	-0.691504	0.374868	0.524055	no	chr6	69048185	69076038	+
circRNA11492	45.8163	42.767	48.9831	46.421	53.2006	41.1385	53.7155	54.8317	60.8997	49.1373	51.9445	47.4376	up	0.130942	0.271064	0.421538	no	chr6	69737942	69752356	-
circRNA11493	56.3222	39.649	43.2632	52.0252	50.038	52.6154	66.913	44.5153	51.7632	69.242	57.0098	48.2596	up	0.240395	0.164983	0.304086	no	chr6	70426439	70452571	+
circRNA11494	6.54233	6.11488	8.39543	5.24228	6.03866	5.73367	8.36595	7.36096	5.21484	8.55358	7.0458	6.46672	up	0.12373	0.519869	0.654851	no	chr6	70533160	70538401	+
circRNA11495	4.23958	4.1336	3.97476	6.05256	5.1373	5.69435	5.15	5.69011	3.21564	7.51772	5.45356	4.70756	up	0.21222	0.380824	0.529431	no	chr6	73621804	73644603	-
circRNA11496	1.15404	2.61145	2.27574	2.53263	4.31015	3.95967	6.82363	14.6853	6.35165	8.1701	7.99806	2.5768	up	1.63407	0.0373835	0.127825	yes	chr6	73730344	73736508	+
circRNA11497	2.29316	2.13504	2.49517	2.17235	2.28146	2.2184	2.44597	2.45862	2.6853	3.52232	2.66612	2.27543	up	0.228599	0.162181	0.300249	no	chr6	75659262	75670720	+
circRNA11498	3.88353	3.6822	3.71848	3.82835	3.56688	4.59097	4.53255	4.76446	4.94877	4.4171	4.65077	3.73589	up	0.316019	9.63182e-05	0.0298638	no	chr6	82191073	82204958	-
circRNA11499	2.76368	1.90069	3.19644	4.03088	2.87563	2.84682	3.33638	3.56811	3.56529	3.21582	3.30648	2.95346	up	0.162889	0.381489	0.530108	no	chr6	82210814	82211572	-
circRNA115	13.5006	10.9945	6.48206	11.2769	6.63281	7.97205	38.4889	16.6611	24.9541	16.7921	20.9736	9.77737	up	1.10106	0.0943686	0.210913	no	chr13	106512529	106512812	-
circRNA1150	30.7871	36.8406	25.8004	26.1264	11.8072	0.0181682	0.0188621	0.0557529	5.49633	0.0168281	1.12119	26.2723	down	-4.55044	0.00274372	0.0470012	yes	chr7	138709624	138733093	-
circRNA11500	3.41069	4.07938	3.60948	4.16171	3.9479	4.4796	5.05038	3.99831	4.32815	4.30868	4.43303	3.84183	up	0.206497	0.0309611	0.11674	no	chr6	82224068	82231842	-
circRNA11501	4.14995	3.31259	4.25536	4.7928	8.11723	36.122	17.8695	26.3479	9.07898	22.8806	22.4598	4.92559	up	2.18898	0.0162267	0.0853996	yes	chr6	83346173	83407901	-
circRNA11502	3.62519	3.99502	4.60469	4.22531	4.3336	3.36655	4.63304	6.91649	4.77114	5.12297	4.96204	4.15676	up	0.255473	0.237854	0.386824	no	chr6	84146687	84163270	-
circRNA11503	25.9554	29.6619	27.4761	25.3453	37.6024	25.2144	28.0646	28.6446	29.4341	39.7658	30.2247	29.2082	up	0.0493539	0.768723	0.847757	no	chr6	85507233	85514629	-
circRNA11504	4.63971	4.72688	5.24314	4.83087	5.8214	3.77443	5.67336	5.82471	6.00741	5.23919	5.30382	5.0524	up	0.0700624	0.602516	0.721771	no	chr6	85533599	85543760	-
circRNA11505	6.81582	6.77891	6.7689	7.98412	7.70801	6.52057	7.70471	7.1413	7.8774	7.87161	7.42312	7.21115	up	0.0417953	0.584202	0.707115	no	chr6	85547112	85567577	-
circRNA11506	14.3228	13.2526	14.9852	15.9782	17.8332	16.1512	16.6353	18.2343	17.8188	17.7574	17.3194	15.2744	up	0.181272	0.0580974	0.159079	no	chr6	85557976	85572374	-
circRNA11507	7.90888	6.88869	8.00245	8.22983	9.55837	8.53161	8.79391	9.13314	8.80157	9.21152	8.89435	8.11764	up	0.131828	0.145612	0.279363	no	chr6	85565332	85574378	-
circRNA11508	5.90668	7.65978	10.5441	4.90054	4.9229	4.04892	4.7721	5.07352	5.33497	4.05798	4.6575	6.78681	down	-0.543179	0.116508	0.240883	no	chr6	87371593	87375710	+
circRNA11509	5.56776	5.95677	5.97195	5.7866	5.97828	6.34968	8.09648	9.01005	9.00951	7.62109	8.01736	5.85227	up	0.45413	0.0112185	0.072478	no	chr6	87601784	87616427	+
circRNA1151	36.9676	44.8355	31.3433	28.7169	14.9059	0.0395556	0.017422	0.0620598	7.41637	0.105473	1.52818	31.3538	down	-4.35876	0.00268612	0.0467575	yes	chr7	138745123	138786260	-
circRNA11510	1.15566	0.900761	1.20876	2.21025	0.0619454	0	0.0605226	0	0	0	0.0121045	1.10747	down	-6.51558	0.0333008	0.121147	yes	chr6	88057612	88059588	+
circRNA11511	2.4521	3.18891	2.98841	2.8108	3.98828	2.29854	2.45074	2.53538	2.57757	2.9686	2.56617	3.0857	down	-0.265984	0.116995	0.241626	no	chr6	89677570	89683904	-
circRNA11512	13.8071	14.08	38.2196	28.4538	43.5092	30.3989	28.3457	92.8316	0.10923	25.6529	35.4677	27.6139	up	0.361107	0.653564	0.762092	no	chr6	93269477	93358411	-
circRNA11513	16.6248	15.6062	18.6995	17.1412	18.4095	13.8881	16.783	15.538	21.6147	16.091	16.7829	17.2962	down	-0.0434633	0.731124	0.820593	no	chr6	99545112	99551895	-
circRNA11514	25.369	25.6297	24.6725	28.1752	38.1893	26.611	24.4819	22.4	30.2295	33.5102	27.4465	28.4071	down	-0.0496296	0.772777	0.850606	no	chr6	106248150	106293106	-
circRNA11515	16.5308	17.4601	22.3833	19.8991	23.6857	17.4526	14.5761	17.4313	20.2044	19.9038	17.9136	19.9918	down	-0.158351	0.261959	0.412275	no	chr6	106279661	106316266	-
circRNA11516	31.6472	33.0537	20.127	56.475	35.4678	6.64987	23.8249	14.1034	17.2113	7.80334	13.9186	35.3541	down	-1.34487	0.0180735	0.0896946	yes	chr6	107503657	107533610	+
circRNA11517	6.22102	8.28676	10.2206	7.93335	8.33844	5.93473	6.52115	8.18635	7.49927	8.22757	7.27381	8.20003	down	-0.172916	0.273972	0.424568	no	chr6	109610365	109633323	-
circRNA11518	4.56368	3.40997	3.82712	3.58417	6.00911	8.73842	5.69108	8.20056	7.61796	8.42422	7.73445	4.27881	up	0.854089	0.00143957	0.0430652	no	chr6	109715078	109735298	+
circRNA11519	2.81023	2.2124	1.98605	2.59137	1.07797	1.31634	0.574898	1.31412	0.481792	0.422048	0.821841	2.13561	down	-1.37771	0.00846893	0.0639612	yes	chr6	111177212	111177665	+
circRNA1152	12.7187	12.9631	9.16854	14.8317	4.76742	0.0520032	0	0	2.74984	0	0.560369	10.8899	down	-4.28047	0.00310238	0.0483469	yes	chr7	138762340	138763025	-
circRNA11520	3.37502	3.26629	4.24303	4.94463	3.49583	2.96951	3.58654	4.23253	3.74888	3.02272	3.51204	3.86496	down	-0.138146	0.402524	0.55067	no	chr6	111329532	111333367	-
circRNA11521	7.56972	7.41944	9.8881	12.2249	8.06445	6.24295	8.18276	10.4514	8.57242	6.68009	8.02592	9.03332	down	-0.170589	0.418597	0.564967	no	chr6	111329532	111359014	-
circRNA11522	9.64133	9.96611	14.3178	15.4396	11.8074	8.90959	10.6201	12.7974	11.0486	9.68523	10.6122	12.2344	down	-0.205226	0.265896	0.416361	no	chr6	111335469	111368028	-
circRNA11523	3.62713	2.47689	4.62943	2.78722	5.96935	11.0271	5.52059	6.02417	5.22349	5.06147	6.57137	3.898	up	0.753458	0.0819704	0.194421	no	chr6	116399198	116399666	+
circRNA11524	1.55708	1.17214	1.667	1.84952	2.08675	1.80377	2.19255	1.7425	1.92488	2.38702	2.01014	1.6665	up	0.27048	0.118465	0.243529	no	chr6	116647459	116660846	-
circRNA11525	2.2359	2.00683	2.0232	2.15812	2.92342	2.58405	2.77693	2.39369	2.39025	2.68356	2.5657	2.26949	up	0.17698	0.165393	0.304491	no	chr6	118826147	118829250	-
circRNA11526	4.0171	3.84925	4.73852	3.80953	4.30306	3.85304	4.69706	5.21258	5.26473	2.83558	4.3726	4.14349	up	0.077644	0.660393	0.767522	no	chr6	121106023	121131752	-
circRNA11527	2.83194	5.12103	4.75502	4.3013	3.62163	2.77676	3.81871	4.24573	6.94369	3.33638	4.22426	4.12618	up	0.0338899	0.909641	0.941942	no	chr6	129478693	129481439	+
circRNA11528	13.716	13.7468	12.5432	14.0978	9.65813	15.5937	15.5874	17.0737	16.7743	15.8462	16.175	12.7524	up	0.343001	0.0106341	0.0710266	no	chr6	129629353	129634105	-
circRNA11529	5.99437	7.83461	6.50091	7.11764	14.4452	15.3517	12.5509	11.5198	8.88966	17.196	13.1016	8.37855	up	0.644972	0.0570286	0.157806	no	chr6	130904465	130956499	-
circRNA1153	30.8536	41.1873	35.8393	25.6976	20.0601	25.2166	26.389	29.3399	27.1113	39.8205	29.5755	30.7276	down	-0.0551326	0.807337	0.875261	no	chr7	139715932	139717015	-
circRNA11530	7.12276	8.70093	8.39107	7.27711	8.66604	8.53189	9.59668	9.52222	10.4144	9.22565	9.45816	8.03158	up	0.235876	0.0148564	0.0819799	no	chr6	131598287	131608071	-
circRNA11531	2.7998	3.41375	4.15205	4.47691	3.28955	3.35057	2.28988	2.75073	3.776	3.46875	3.12719	3.62641	down	-0.213677	0.252663	0.402144	no	chr6	135442582	135457713	-
circRNA11532	12.5842	13.7394	13.9125	17.4259	25.5761	22.1221	23.1177	21.0357	23.2202	21.5505	22.2092	16.6476	up	0.415844	0.0784644	0.189428	no	chr6	136580301	136659378	-
circRNA11533	8.83317	8.83293	8.67434	9.82676	16.0433	12.236	15.7552	13.2408	14.4012	16.0156	14.3298	10.4421	up	0.456602	0.0503421	0.147915	no	chr6	136656307	136720589	-
circRNA11534	8.487	8.73053	7.84124	9.62581	15.4905	11.9252	15.0758	11.9572	13.7669	14.5956	13.4641	10.035	up	0.42408	0.0700263	0.177474	no	chr6	136694140	136720589	-
circRNA11535	7.76033	7.10292	7.97825	6.51731	5.48179	2.67749	3.49877	2.0206	2.33589	4.07316	2.92118	6.96812	down	-1.25422	0.000148319	0.0309996	yes	chr6	138429711	138433680	-
circRNA11536	6.02688	4.1154	4.8395	4.41525	4.92685	3.94545	4.2674	3.84003	4.14637	3.44046	3.92794	4.86478	down	-0.3086	0.0422196	0.135974	no	chr6	138907495	138914761	-
circRNA11537	7.72333	5.94529	6.83429	5.49453	6.44791	4.88028	5.74957	5.48181	5.19126	4.43024	5.14663	6.48907	down	-0.334384	0.0213833	0.0974179	no	chr6	138907495	138915976	-
circRNA11538	6.04661	6.17586	5.11561	6.99667	8.04953	6.7303	8.89401	7.3521	6.71041	7.1031	7.35798	6.47686	up	0.184017	0.205292	0.350861	no	chr6	142759772	142837047	-
circRNA11539	6.29198	6.62425	6.46359	6.10832	9.60604	6.99952	8.95957	5.8012	7.54275	5.86705	7.03402	7.01884	up	0.00311673	0.986612	0.99173	no	chr6	143760401	143765798	+
circRNA1154	6.64954	6.78273	6.33932	5.30712	6.65972	5.58412	5.77464	10.1166	5.56432	8.31503	7.07094	6.34768	up	0.155672	0.487485	0.626857	no	chr7	140355668	140369682	-
circRNA11540	5.89939	4.95423	5.15489	5.30424	7.71163	5.80308	8.69051	6.22736	6.98471	7.31032	7.0032	5.80487	up	0.270748	0.129001	0.258128	no	chr6	143765261	143783280	+
circRNA11541	3.95918	5.07059	5.90649	3.46818	7.06663	4.24254	7.70265	5.59962	9.8628	7.35851	6.95322	5.09421	up	0.448822	0.15241	0.287973	no	chr6	144531052	144557311	+
circRNA11542	3.87364	4.89026	5.85511	3.38039	6.86073	4.08487	7.46537	5.43259	9.79401	7.00295	6.75596	4.97203	up	0.442326	0.167517	0.306422	no	chr6	144537582	144557311	+
circRNA11543	6.04336	7.87669	9.29578	5.19066	11.6553	7.41632	12.9202	9.94938	16.2858	12.6381	11.8419	8.01236	up	0.563607	0.079615	0.19112	no	chr6	144537582	144577288	+
circRNA11544	2.12174	3.55741	3.95873	1.78116	4.26486	2.55965	3.54416	3.11841	4.76225	2.83306	3.3635	3.13678	up	0.10068	0.729353	0.819578	no	chr6	144577099	144577288	+
circRNA11545	14.358	13.7742	13.9954	13.5756	9.92233	7.18009	7.22688	5.64324	6.31463	6.92829	6.65863	13.1251	down	-0.979034	0.000629987	0.0368952	no	chr6	145671239	145686296	-
circRNA11546	14.4483	13.211	13.5954	18.3012	14.1182	15.6759	13.5325	11.6852	14.5829	13.9981	13.8949	14.7348	down	-0.0846705	0.480132	0.619897	no	chr6	149512155	149541586	-
circRNA11547	9.42917	7.67177	9.40234	10.0564	8.58845	7.50367	7.57946	7.40713	8.37964	5.47346	7.26867	9.02964	down	-0.312976	0.0244404	0.104343	no	chr6	149572285	149580723	+
circRNA11548	2.92683	2.63173	4.17961	4.66599	3.03163	3.1549	3.58089	3.66787	3.70403	2.96366	3.41427	3.48716	down	-0.030474	0.869621	0.915714	no	chr6	149578822	149580723	+
circRNA11549	2.98125	3.93284	3.89179	3.48139	4.10451	3.42938	3.83404	3.17744	4.72503	3.74749	3.78267	3.67836	up	0.0403456	0.76167	0.842657	no	chr6	149676260	149680457	-
circRNA1155	35.8671	29.017	38.0221	38.1924	20.8991	22.2469	24.4121	20.6968	13.0889	24.333	20.9555	32.3996	down	-0.628642	0.0234655	0.101973	no	chr7	140702866	140704963	+
circRNA11550	27.596	24.9185	30.9509	26.8283	27.3616	28.7555	30.9969	24.8943	33.7817	35.19	30.7237	27.5311	up	0.158291	0.174386	0.315057	no	chr6	149771162	149790058	+
circRNA11551	4.84111	6.36292	4.89259	5.06245	7.19321	2.8736	3.35806	2.43231	4.301	3.67243	3.32748	5.67046	down	-0.769035	0.00449942	0.0527901	no	chr6	152233781	152256765	-
circRNA11552	2.24462	3.38714	2.5227	3.07065	2.82994	1.9141	3.11515	1.38745	2.22941	2.7809	2.2854	2.81101	down	-0.298642	0.195209	0.339437	no	chr6	154442088	154442290	-
circRNA11553	16.106	17.5907	20.1029	18.6573	20.2922	17.6187	18.6231	17.7952	23.3958	16.2288	18.7323	18.5498	up	0.0141251	0.903979	0.938274	no	chr6	154773989	154778045	+
circRNA11554	30.5343	30.0119	31.4204	22.1875	30.7758	22.3293	28.4968	26.437	30.9063	22.6228	26.1584	28.986	down	-0.148079	0.270405	0.420854	no	chr6	157110472	157133207	+
circRNA11555	11.2511	12.3695	11.8826	14.3042	14.1714	11.1801	10.8566	14.6901	8.31092	11.5061	11.3088	12.7958	down	-0.178227	0.253498	0.403007	no	chr6	158429736	158452268	+
circRNA11556	54.8753	65.994	58.5794	54.5282	60.4551	89.797	76.2148	68.4585	49.9709	86.0455	74.0973	58.8864	up	0.331487	0.0986951	0.216617	no	chr6	159991184	160027314	+
circRNA11557	6.86143	9.90499	9.09366	6.7027	10.1355	4.86982	7.22457	8.53732	9.38881	8.1437	7.63284	8.53967	down	-0.161959	0.421148	0.567087	no	chr6	161073466	161081038	+
circRNA11558	12.0823	15.187	16.7357	9.16804	13.0925	9.86963	13.0786	13.689	12.2864	11.3503	12.0548	13.2531	down	-0.136727	0.445045	0.588643	no	chr6	169582836	169660766	-
circRNA11559	6.24914	5.94093	6.78742	6.79097	5.32906	5.02296	6.42689	7.09406	6.88058	5.21821	6.12854	6.21951	down	-0.0212567	0.863029	0.911169	no	chr6	169762429	169769713	+
circRNA1156	3.59096	4.07919	4.23288	4.09002	4.22827	3.03118	4.10349	4.64689	4.55163	4.82146	4.23093	4.04426	up	0.0650978	0.609851	0.727461	no	chr7	140776912	140808995	-
circRNA11560	2.80285	2.75644	2.95965	2.93531	3.48735	2.80669	3.0476	2.87582	3.69245	2.745	3.03351	2.98832	up	0.0216533	0.840026	0.896108	no	chr6	170317370	170323259	+
circRNA11561	11.9247	12.1022	11.2588	12.8495	14.7538	12.0233	13.0185	11.4837	15.2503	12.4421	12.8436	12.5778	up	0.0301673	0.771949	0.850066	no	chr6	170317370	170358318	+
circRNA11562	15.2282	15.1682	18.8092	18.9272	14.9431	22.4826	23.0412	24.4967	20.9734	22.2924	22.6572	16.6152	up	0.44747	0.000984368	0.0396413	no	chr6	170543601	170549113	-
circRNA11563	15.452	11.2856	10.2092	9.56453	23.2232	3.14827	10.1301	4.12186	8.01829	3.61439	5.80658	13.9469	down	-1.26418	0.0294293	0.113873	yes	chr5	9224674	9237890	-
circRNA11564	21.8168	19.035	21.5424	22.1145	24.8273	21.0229	29.1979	28.5021	25.4704	20.6063	24.9599	21.8672	up	0.190844	0.178347	0.319482	no	chr5	10391542	10407202	+
circRNA11565	4.60902	4.9339	4.96059	4.08849	6.4706	5.46409	7.001	5.61901	5.39887	7.13176	6.12295	5.01252	up	0.28869	0.0802809	0.192099	no	chr5	14293012	14304592	+
circRNA11566	10.632	12.4426	13.0599	15.8287	8.81016	4.40944	7.84077	5.37413	13.2133	4.51868	7.07126	12.1547	down	-0.781471	0.0399413	0.131934	no	chr5	16761464	16762637	-
circRNA11567	19.1423	29.826	29.5213	28.5177	14.9068	7.44407	10.9854	6.30458	21.8558	8.12681	10.9433	24.3828	down	-1.15581	0.0125918	0.0757251	yes	chr5	16779545	16794833	-
circRNA11568	6.62737	3.61729	3.3061	8.6584	2.53925	6.97373	8.09753	12.4161	3.50615	4.1156	7.02181	4.94968	up	0.504508	0.327333	0.478419	no	chr5	32048539	32077606	+
circRNA11569	6.04841	5.86668	6.53971	5.78308	6.48933	5.07691	6.55112	6.07289	6.64963	5.85331	6.04077	6.14544	down	-0.0247835	0.756575	0.838268	no	chr5	32379115	32388674	-
circRNA1157	3.50215	3.82914	4.60781	3.87176	3.76644	2.57239	4.01468	4.31456	5.04212	4.44803	4.07836	3.91546	up	0.0588061	0.731536	0.820834	no	chr7	140783021	140787584	-
circRNA11570	11.1184	12.8214	13.041	12.1518	12.5994	10.8084	12.161	11.1434	12.7265	11.5614	11.6802	12.3464	down	-0.080033	0.206855	0.352692	no	chr5	32379115	32420103	-
circRNA11571	3.61944	3.31116	3.58315	3.26472	2.84411	2.82862	3.10208	3.49588	3.27385	2.76829	3.09374	3.32451	down	-0.10379	0.27014	0.420673	no	chr5	32385508	32390437	-
circRNA11572	7.01726	8.50446	9.03332	7.79056	8.3354	7.47435	9.17086	8.34111	9.6187	7.9187	8.50475	8.1362	up	0.0639127	0.501298	0.639132	no	chr5	32390275	32404097	-
circRNA11573	81.31	66.876	85.9233	106.408	66.4452	29.0761	94.0476	59.9829	38.5409	43.8051	53.0905	81.3926	down	-0.616443	0.0763233	0.186211	no	chr5	32724698	32784883	+
circRNA11574	14.1207	15.6082	13.2615	18.9991	12.7856	9.48148	16.4577	20.2707	18.9322	11.8204	15.3925	14.955	up	0.0415979	0.858141	0.90882	no	chr5	34803712	34811945	+
circRNA11575	2.35056	2.18144	2.00668	2.50349	2.41168	1.43908	2.30191	3.23348	2.92938	1.87234	2.35524	2.29077	up	0.0400415	0.858353	0.908842	no	chr5	34822956	34824491	+
circRNA11576	64.386	37.454	28.507	118.018	17.887	25.5046	59.5412	17.2215	0.124082	25.2533	25.5289	53.2504	down	-1.06066	0.221424	0.369247	no	chr5	35010000	35040663	-
circRNA11577	3.04956	3.70939	4.51415	3.35927	3.48892	4.16882	4.11481	5.24625	4.19595	4.31744	4.40866	3.62426	up	0.282652	0.0431158	0.13737	no	chr5	36117735	36142599	-
circRNA11578	10.9837	26.8274	24.3557	6.07527	6.98144	0.375191	0.496296	1.24898	2.48988	0.326178	0.987305	15.0447	down	-3.92961	0.0327363	0.120255	yes	chr5	36251313	36269467	-
circRNA11579	2.31803	1.96162	2.50755	2.25467	2.36077	1.63036	1.98822	2.65533	2.64006	1.90124	2.16304	2.28053	down	-0.0763063	0.622368	0.73696	no	chr5	37114960	37120340	-
circRNA1158	49.3551	55.506	44.2013	30.0965	82.713	27.6034	35.0102	20.2584	26.6322	56.7728	33.2554	52.3744	down	-0.655272	0.116155	0.240274	no	chr7	144200171	144239388	+
circRNA11580	8.48393	11.0956	10.4567	8.53354	9.43827	5.88965	7.91071	8.37463	12.0763	8.42017	8.53429	9.60161	down	-0.170005	0.379637	0.52837	no	chr5	37195858	37224740	-
circRNA11581	2.2961	2.21641	2.13098	2.26172	2.66701	1.32681	1.88433	1.82604	2.65374	1.89412	1.91701	2.31444	down	-0.271809	0.141657	0.27426	no	chr5	37238857	37247745	-
circRNA11582	10.5575	11.518	9.37701	9.56988	10.7855	9.88158	11.9119	11.9447	17.2227	12.2368	12.6395	10.3616	up	0.2867	0.138029	0.269642	no	chr5	37317988	37324107	-
circRNA11583	10.444	14.08	13.9452	12.1788	10.6426	4.09941	5.68628	3.7568	10.7734	3.79904	5.62298	12.2581	down	-1.12433	0.0043676	0.052381	yes	chr5	38482589	38530666	-
circRNA11584	30.7172	38.7011	39.4103	35.2034	54.1809	38.6077	48.5569	43.2634	45.7969	52.4726	45.7395	39.6426	up	0.206389	0.228996	0.377437	no	chr5	39002535	39021136	-
circRNA11585	20.4167	30.4989	29.5766	21.6511	25.9526	20.7554	27.8872	28.9184	33.8925	23.4821	26.9871	25.6192	up	0.0750462	0.665579	0.771716	no	chr5	40728345	40747019	-
circRNA11586	10.9142	20.0527	16.1379	11.1417	15.0885	7.24837	9.10843	9.13782	5.71679	8.81783	8.00585	14.667	down	-0.873449	0.0138028	0.0791009	no	chr5	41762111	41807438	-
circRNA11587	12.1694	13.5991	13.8428	13.8052	8.61036	6.15178	6.53873	7.35428	7.80445	6.86259	6.94237	12.4054	down	-0.837468	0.00401797	0.0511959	no	chr5	43609143	43619119	+
circRNA11588	13.1686	14.5712	15.264	14.1884	10.4003	7.35688	7.08358	8.37746	8.67966	8.48572	7.99666	13.5185	down	-0.757465	0.00159347	0.0431249	no	chr5	43609143	43677806	+
circRNA11589	12.2293	13.1459	15.3428	13.2334	9.44132	7.0921	6.57418	7.45342	7.76807	8.06602	7.39076	12.6785	down	-0.778594	0.00400656	0.0511131	no	chr5	43644192	43700237	+
circRNA1159	15.8656	17.2933	23.8765	15.8756	14.9101	38.3684	27.7775	53.6781	22.5987	29.1068	34.3059	17.5642	up	0.965816	0.0350172	0.124011	no	chr7	149018992	149021147	-
circRNA11590	9.40184	10.2531	11.8591	10.3313	8.54934	6.13905	4.79324	5.78754	6.92984	8.04192	6.33832	10.0789	down	-0.669172	0.00132089	0.0420429	no	chr5	43655840	43677806	+
circRNA11591	5.5776	7.67831	6.98124	7.09384	8.36474	8.50252	18.2305	16.1037	12.468	9.02495	12.8659	7.13915	up	0.849733	0.038264	0.129348	no	chr5	52861447	52865817	+
circRNA11592	10.1597	10.7823	12.5995	13.9691	14.2244	12.8213	32.711	27.1419	21.2506	14.9755	21.7801	12.347	up	0.818849	0.0624223	0.166305	no	chr5	52908898	52947461	+
circRNA11593	3.42198	3.2751	4.29687	4.12035	4.10467	2.97755	3.18049	3.13315	2.85533	2.9194	3.01318	3.8438	down	-0.351244	0.0133238	0.0778998	no	chr5	55267138	55273377	-
circRNA11594	5.69216	6.10609	6.18781	6.74694	7.66889	6.62145	7.74435	7.78477	8.71893	7.26062	7.62602	6.48038	up	0.234853	0.0458501	0.141506	no	chr5	55327716	55351029	+
circRNA11595	3.4046	3.82057	3.85422	4.14023	4.92028	3.88862	5.0949	4.64099	5.9922	4.86554	4.89645	4.02798	up	0.281679	0.0776209	0.188133	no	chr5	55343331	55366875	+
circRNA11596	1.38308	2.59664	2.35177	2.19913	3.24832	2.52246	3.36977	2.98209	2.43465	3.57331	2.97646	2.35579	up	0.337388	0.141023	0.273355	no	chr5	55652529	55664863	-
circRNA11597	5.56608	7.29075	9.22249	5.02153	10.9331	6.17821	6.32478	6.50244	10.9172	5.99941	7.18441	7.6068	down	-0.0824203	0.778757	0.854985	no	chr5	56864734	56883679	+
circRNA11598	17.0173	20.0305	20.8371	18.5298	22.7005	20.9266	24.0377	24.2602	23.3545	22.7009	23.056	19.823	up	0.217963	0.0267279	0.108623	no	chr5	57230846	57251141	+
circRNA11599	3.09281	3.32396	3.91286	3.04393	3.40756	3.5052	3.80813	4.03108	4.58784	3.49028	3.8845	3.35622	up	0.210892	0.0745394	0.184004	no	chr5	57246300	57249576	+
circRNA116	19.2942	20.3382	17.1002	14.6535	8.57017	12.8345	9.24245	12.2184	13.9901	6.05197	10.8675	15.9912	down	-0.557265	0.083157	0.196118	no	chr13	110622216	110624279	+
circRNA1160	8.60832	11.2668	9.71257	15.2879	4.31066	9.14192	8.79108	15.1958	3.72841	11.0079	9.57303	9.83725	down	-0.0392793	0.920754	0.949015	no	chr7	151781152	151786541	-
circRNA11600	9.73058	7.35221	10.7419	10.6689	14.7583	7.32182	9.6184	8.47692	13.5221	9.59904	9.70765	10.6504	down	-0.133713	0.56924	0.694904	no	chr5	58988493	58993465	-
circRNA11601	13.2775	16.3641	17.227	15.1278	13.8055	12.8008	14.9642	10.3282	15.0127	12.8993	13.2011	15.1604	down	-0.199652	0.124824	0.252583	no	chr5	60898276	60928959	-
circRNA11602	17.6346	19.1962	17.3562	20.9864	21.7383	20.3359	23.011	20.4617	21.3441	23.6737	21.7653	19.3823	up	0.167287	0.0653561	0.170453	no	chr5	61472681	61525976	+
circRNA11603	0.485192	0.538575	0.549486	0.501441	0.474915	0.45606	0.480578	0.928343	0.572874	0.439317	0.575434	0.509922	up	0.174376	0.515488	0.65144	no	chr5	62550367	62551336	+
circRNA11604	8.26201	11.6096	9.42574	4.48892	13.9501	3.26613	4.96974	8.90515	6.00255	5.02564	5.63384	9.54727	down	-0.760969	0.0751813	0.184868	no	chr5	65242104	65291470	-
circRNA11605	0.648774	1.37412	1.1011	0.545206	1.66238	0.334354	0.422136	0.661922	0.475109	0.512303	0.481165	1.06632	down	-1.14803	0.0487756	0.145676	yes	chr5	65451475	65473952	-
circRNA11606	7.89171	7.88093	9.04593	7.26721	9.94597	7.54666	9.72386	8.88117	9.8211	8.8999	8.97454	8.40635	up	0.0943581	0.394449	0.543078	no	chr5	65604911	65618255	-
circRNA11607	10.1294	10.5058	11.6756	11.2338	13.5335	11.9517	14.0315	15.3669	11.9659	14.9896	13.6611	11.4156	up	0.259068	0.0451559	0.140588	no	chr5	66024306	66044298	+
circRNA11608	10.9401	8.19471	9.85806	10.8966	11.6239	12.6873	7.12662	13.0331	13.5239	10.4161	11.3574	10.3027	up	0.140612	0.457326	0.599421	no	chr5	69294793	69311204	-
circRNA11609	3.22721	4.98219	4.70895	2.2175	1.85979	0.368048	0.299162	0.0899453	1.98115	0.809267	0.709515	3.39913	down	-2.26026	0.00922631	0.0667913	yes	chr5	69419371	69424636	+
circRNA1161	9.41911	8.5808	10.687	9.65384	11.9573	8.31067	11.8651	12.0131	10.6054	11.6844	10.8957	10.0596	up	0.115186	0.382707	0.531257	no	chr7	152220523	152238826	-
circRNA11610	5.2807	9.03198	8.00547	3.33451	2.70073	0.53249	0.676065	0.119432	3.31775	1.15706	1.16056	5.67068	down	-2.2887	0.018494	0.0907209	yes	chr5	69419371	69433093	+
circRNA11611	18.142	15.5232	10.3907	11.5318	12.3253	17.3759	13.9606	9.08696	16.5653	10.4912	13.496	13.5826	down	-0.00923031	0.969073	0.980564	no	chr5	70063415	70067446	+
circRNA11612	20.7514	18.0034	13.0459	15.3003	16.8959	21.5594	18.7872	13.0859	20.974	13.4604	17.5734	16.7994	up	0.0649826	0.738343	0.825492	no	chr5	70065965	70070751	+
circRNA11613	4.65383	7.17997	14.1202	5.65797	9.40729	4.72522	5.74754	6.94124	5.79225	5.63776	5.7688	8.20385	down	-0.50803	0.223961	0.372136	no	chr5	71048006	71049158	-
circRNA11614	8.19835	7.93361	9.2737	9.77586	10.4319	7.36297	10.3627	9.3003	10.2579	9.41093	9.33897	9.12268	up	0.0338052	0.770243	0.848894	no	chr5	72855774	72865729	+
circRNA11615	3.44823	5.34936	10.1708	4.82841	5.89151	18.202	16.4597	20.406	16.3163	17.7225	17.8213	5.93767	up	1.58563	5.52414e-05	0.0293042	yes	chr5	72989427	72990864	+
circRNA11616	5.00556	5.41835	5.82619	4.84102	6.61948	14.1957	11.3832	12.8924	9.21555	12.166	11.9706	5.54212	up	1.11098	0.000692197	0.0376767	yes	chr5	73074742	73087753	+
circRNA11617	3.2349	2.8741	4.13099	3.94047	2.6443	0.769288	0.275298	0.16692	0.399311	0.712544	0.464672	3.36495	down	-2.8563	0.000184253	0.0325096	yes	chr5	74834426	74841679	-
circRNA11618	3.51292	1.35001	1.64778	4.24268	1.19979	1.2232	0.989067	1.4798	2.41758	1.18278	1.45848	2.39064	down	-0.712925	0.220732	0.368506	no	chr5	75343853	75345658	+
circRNA11619	20.0477	19.6856	28.3954	17.4479	17.1392	19.4012	8.11029	25.8613	17.301	16.0938	17.3535	20.5432	down	-0.243429	0.39363	0.542346	no	chr5	77098655	77118521	+
circRNA1162	28.9423	28.3505	32.4973	28.4644	38.1378	27.0281	34.901	35.249	32.7744	36.0918	33.2089	31.2785	up	0.0863986	0.461248	0.602723	no	chr7	152273705	152358675	-
circRNA11620	4.61301	5.08753	6.36339	5.82757	5.28268	7.58679	7.8521	8.08775	7.44117	6.49058	7.49168	5.43484	up	0.463053	0.00103637	0.0397724	no	chr5	77449760	77453928	-
circRNA11621	15.458	14.4656	12.6321	14.9015	13.6309	13.9325	15.1407	15.1242	18.1993	14.1307	15.3055	14.2176	up	0.106365	0.272432	0.422876	no	chr5	78388837	78421960	+
circRNA11622	1.38303	0.866237	0.977418	1.16904	1.251	10.0974	3.27634	4.95086	0.533497	6.83702	5.13902	1.12934	up	2.18601	0.0679312	0.174243	no	chr5	78509784	78510398	-
circRNA11623	10.5905	7.24056	9.42172	14.946	3.29154	9.08984	7.69961	11.3043	2.88064	5.65515	7.32592	9.09806	down	-0.312549	0.483189	0.622485	no	chr5	79042283	79044552	-
circRNA11624	13.7076	12.1277	12.5102	9.75395	21.8379	14.6015	12.3162	10.8303	16.4511	12.451	13.33	13.9875	down	-0.0694588	0.783923	0.858518	no	chr5	80158836	80169546	-
circRNA11625	8.93195	8.67715	9.30118	9.95979	9.63382	11.0952	9.70655	9.75067	10.6076	9.47359	10.1267	9.30078	up	0.122743	0.0676629	0.173899	no	chr5	80449591	80474830	+
circRNA11626	3.18664	3.60603	4.30629	3.23291	3.4758	3.88359	4.59781	4.70218	4.67553	3.67804	4.30743	3.56154	up	0.274328	0.0364535	0.126255	no	chr5	80472761	80473859	+
circRNA11627	117.713	109.296	109.662	83.8784	113.021	66.1145	89.7071	79.6712	99.0622	70.962	81.1034	106.714	down	-0.395915	0.0161817	0.0852917	no	chr5	81615473	81650339	-
circRNA11628	10.4446	10.6234	6.93348	11.3324	15.1805	21.2485	38.4347	24.6839	24.9542	21.968	26.2579	10.9029	up	1.26804	0.00527119	0.0551766	yes	chr5	88804598	88823927	-
circRNA11629	4.89893	8.48553	8.36954	3.61809	2.965	1.12636	0.897658	0.714409	0.639847	0.844309	0.844516	5.66742	down	-2.7465	0.0143707	0.0808313	yes	chr5	90781430	91102340	+
circRNA1163	3.34936	4.29685	3.46522	4.36254	3.87757	4.53033	5.32823	6.30334	5.32534	6.02767	5.50298	3.87031	up	0.507765	0.00327191	0.0487344	no	chr7	155678608	155680908	+
circRNA11630	23.7216	22.7994	23.1047	22.0721	29.5515	29.1769	34.0813	38.7623	37.0643	31.5356	34.1241	24.2498	up	0.492815	0.00245108	0.0455226	no	chr5	94050731	94074769	-
circRNA11631	1.3283	1.87751	3.18272	1.06965	3.38292	8.48664	6.16805	7.34982	3.79978	6.75581	6.51202	2.16822	up	1.58659	0.00240167	0.0455226	yes	chr5	94894649	94924021	-
circRNA11632	2.4046	3.09094	5.87857	2.86169	6.77795	16.2593	12.8105	16.7575	6.7243	14.9701	13.5043	4.20275	up	1.68402	0.00413628	0.0515616	yes	chr5	94909251	94931991	-
circRNA11633	7.63715	8.20617	8.98051	7.11307	3.73694	2.47248	2.18613	1.51713	6.51685	1.69022	2.87656	7.13477	down	-1.31052	0.0110277	0.0720416	yes	chr5	95755396	95783963	+
circRNA11634	13.2263	15.3651	16.2268	15.2953	20.061	17.2441	15.7175	16.9665	42.6793	21.0104	22.7236	16.0349	up	0.502973	0.261133	0.41138	no	chr5	96985080	97015095	+
circRNA11635	8.76577	8.40665	9.28579	11.343	9.35179	10.9873	11.3287	8.29479	9.44743	9.37664	9.88698	9.4306	up	0.0681798	0.563306	0.689762	no	chr5	98892525	98894686	-
circRNA11636	5.7304	9.94938	16.8843	5.85945	8.44807	2.5084	5.91285	2.122	1.32383	11.1213	4.59767	9.37432	down	-1.02781	0.118466	0.243529	no	chr5	102247252	102270806	-
circRNA11637	3.27248	5.36087	9.96767	3.51151	4.06052	1.51659	3.28391	1.13635	0.926401	6.42038	2.65672	5.23461	down	-0.978433	0.149048	0.283532	no	chr5	102257115	102270806	-
circRNA11638	0.859633	1.27723	3.33206	1.34006	1.3993	0.433257	1.40445	0.428601	0.477395	2.619	1.07254	1.64166	down	-0.614119	0.377791	0.526904	no	chr5	102257943	102260319	-
circRNA11639	22.5813	25.0431	30.8355	24.3907	28.3388	24.61	28.2942	27.9831	37.5524	27.9402	29.276	26.2379	up	0.158066	0.28587	0.437119	no	chr5	108768093	109100519	+
circRNA1164	22.7119	24.4767	21.4175	23.334	31.4649	25.3063	29.9024	39.5369	23.6084	39.7072	31.6122	24.681	up	0.357083	0.122561	0.249459	no	chr7	155706860	155718443	+
circRNA11640	5.6645	6.92714	7.85731	6.90189	7.76906	5.96674	7.07071	7.24515	10.1275	6.56428	7.39488	7.02398	up	0.0742373	0.66638	0.772333	no	chr5	108768093	108959347	+
circRNA11641	5.1786	6.27371	7.52568	5.52296	7.10304	5.43438	6.94423	7.61174	9.89015	5.97126	7.17035	6.3208	up	0.181937	0.378153	0.527189	no	chr5	108871365	108959347	+
circRNA11642	6.5968	8.24446	10.1079	7.07542	9.29779	6.96353	8.88857	9.67581	12.6715	7.75264	9.19041	8.26446	up	0.153207	0.46065	0.602217	no	chr5	108897659	108959347	+
circRNA11643	6.77596	6.7219	7.42595	7.61402	9.5444	10.1491	7.77151	6.44639	5.05934	11.19	8.12326	7.61645	up	0.0929415	0.699556	0.797353	no	chr5	109713520	109774965	+
circRNA11644	6.29251	6.51692	7.23372	6.98749	9.15591	9.20935	7.61316	6.48563	4.79035	10.7431	7.76831	7.23731	up	0.102148	0.66202	0.768812	no	chr5	109713520	109789527	+
circRNA11645	15.868	17.4488	28.1958	14.6072	12.8194	12.0729	8.95816	14.5695	7.22668	15.9697	11.7594	17.7879	down	-0.597081	0.10157	0.220946	no	chr5	110528588	110642371	-
circRNA11646	16.7835	22.4133	22.616	19.9924	23.3531	21.3681	27.3584	22.5327	21.6142	8.76036	20.3268	21.0316	down	-0.0491807	0.839716	0.895869	no	chr5	113101739	113151422	-
circRNA11647	0.507495	0.300203	0.806982	0.155991	0.0510052	0.109716	0.249168	0.490998	0.313222	0.203245	0.27327	0.364335	down	-0.414939	0.564328	0.69077	no	chr5	114404438	114404856	+
circRNA11648	10.0358	10.6178	8.36522	10.3711	14.1819	18.2033	12.8607	12.8445	13.7576	17.6513	15.0635	10.7144	up	0.491509	0.0220781	0.0991377	no	chr5	115221824	115241606	-
circRNA11649	9.50581	8.38627	8.51176	10.9996	8.75128	12.1091	12.166	9.34415	9.81915	11.4993	10.9875	9.23094	up	0.251319	0.051498	0.149923	no	chr5	119097979	119121139	+
circRNA1165	12.6995	11.6989	15.2732	11.6398	14.3504	11.2796	16.9231	20.4725	15.9539	16.3	16.1858	13.1324	up	0.301602	0.112679	0.235918	no	chr7	156724112	156763795	-
circRNA11650	5.55214	7.22146	5.67789	8.3324	6.72606	4.50464	13.5424	6.48303	8.37429	5.3161	7.6441	6.70199	up	0.189756	0.602551	0.721772	no	chr5	128131067	128147729	+
circRNA11651	3.40949	3.75379	2.6915	4.70145	3.28214	2.05786	6.98405	3.33905	4.6018	2.89811	3.97617	3.56767	up	0.156398	0.674583	0.779055	no	chr5	128138597	128152805	+
circRNA11652	6.51719	8.08053	8.33648	7.73874	13.3155	13.2673	16.5559	14.1221	10.5736	15.8995	14.0837	8.79768	up	0.678827	0.0102618	0.0701413	no	chr5	131439581	131462088	-
circRNA11653	5.04665	5.71848	5.7974	5.2643	9.42848	9.08337	11.1179	8.88921	7.94259	11.1081	9.62823	6.25106	up	0.62317	0.0119063	0.0739863	no	chr5	131472587	131548190	-
circRNA11654	15.6087	17.7505	17.0818	17.0134	25.7627	26.2096	29.655	22.1658	23.4606	30.4608	26.3903	18.6434	up	0.501343	0.0133774	0.0780074	no	chr5	131472587	131592466	-
circRNA11655	3.86599	4.77977	5.03974	5.23578	5.92425	11.8401	8.90989	11.1021	5.26767	8.84889	9.19373	4.96911	up	0.887665	0.0185291	0.0907281	no	chr5	131647090	131677872	-
circRNA11656	1.56578	1.66594	1.81114	1.85792	2.17001	4.07166	3.05292	4.43063	2.00917	2.90744	3.29437	1.81416	up	0.860702	0.0249354	0.105305	no	chr5	131670463	131679175	-
circRNA11657	0.181626	0.407292	0.417848	0.335263	0.10869	0.222631	0.278713	0.374386	0.431799	0.240628	0.309631	0.290144	up	0.0937845	0.799702	0.869785	no	chr5	134302590	134308727	-
circRNA11658	0.652703	0.844336	0.834876	0.710052	0.560325	0.709366	0.686067	0.893233	1.09587	0.556391	0.788186	0.720458	up	0.129622	0.553577	0.682991	no	chr5	134302590	134321903	-
circRNA11659	3.70851	4.50418	3.94316	4.08889	5.2013	5.09333	5.26636	3.97526	4.4203	4.94522	4.74009	4.28921	up	0.144205	0.238852	0.387876	no	chr5	134777574	134819004	+
circRNA1166	33.9973	27.9904	29.0928	27.8852	31.3456	24.5931	35.9974	45.187	37.0408	39.1034	36.3844	30.0623	up	0.275364	0.135333	0.266014	no	chr7	156826605	156836885	-
circRNA11660	2.16049	2.69633	2.72533	2.47536	3.16898	2.84703	3.35639	2.78689	2.88142	3.12895	3.00014	2.6453	up	0.181598	0.11527	0.239179	no	chr5	134781133	134796150	+
circRNA11661	2.68438	3.2651	3.05683	3.00248	3.73745	3.51571	4.03939	3.07152	3.44931	3.75582	3.56635	3.14925	up	0.179443	0.117085	0.24174	no	chr5	134781133	134807941	+
circRNA11662	0.908604	1.32221	1.42683	1.30918	1.43928	1.19471	1.38359	1.56133	1.28091	1.50985	1.38608	1.28122	up	0.113488	0.405106	0.553578	no	chr5	134781133	134782086	+
circRNA11663	9.58532	12.2642	15.5172	10.7296	8.76014	7.52923	12.5269	6.19149	6.9196	15.4486	9.72316	11.3713	down	-0.225897	0.47269	0.613012	no	chr5	134969939	135009490	+
circRNA11664	30.2812	24.6447	9.87888	43.3411	10.1061	4.86041	5.77676	4.81412	8.14686	3.93105	5.50584	23.6504	down	-2.10283	0.0454826	0.140934	yes	chr5	137634037	137639977	-
circRNA11665	13.8769	19.7674	6.101	13.0343	9.72564	1.85156	1.8561	2.06181	4.31548	1.99412	2.41582	12.501	down	-2.37147	0.0102071	0.0699709	yes	chr5	137709750	137720584	-
circRNA11666	0.96218	1.49516	1.30445	1.1702	1.66409	1.3246	1.51467	1.34812	1.26463	1.34142	1.35869	1.31922	up	0.0425333	0.772717	0.850585	no	chr5	138018302	138019146	-
circRNA11667	2.81214	3.1082	2.93316	2.43159	2.8194	4.01033	3.19045	2.90282	3.29556	2.72142	3.22412	2.8209	up	0.192749	0.155568	0.292084	no	chr5	138391013	138393372	+
circRNA11668	39.7402	36.8389	40.0068	41.4587	23.738	73.1864	41.0805	34.2434	26.742	40.5341	43.1573	36.3565	up	0.24739	0.461975	0.603294	no	chr5	138568925	138571141	-
circRNA11669	27.9477	27.9593	31.1463	34.2312	30.8662	48.2872	42.7056	29.2204	42.0461	37.5218	39.9562	30.4302	up	0.392918	0.037047	0.127259	no	chr5	138781923	138827718	+
circRNA1167	17.5274	20.7899	22.0517	20.6816	22.6746	17.1558	16.8329	19.082	20.711	23.3727	19.4309	20.745	down	-0.0944161	0.408769	0.556587	no	chr7	157163810	157170450	+
circRNA11670	17.8543	19.5288	29.795	23.7202	22.5356	27.65	29.7573	23.6584	26.6344	21.5995	25.8599	22.6868	up	0.188865	0.247244	0.39652	no	chr5	139307239	139308327	+
circRNA11671	23.007	29.8026	34.8596	33.2897	26.2702	42.0821	41.7349	34.6928	41.7131	32.1792	38.4804	29.4458	up	0.386062	0.0176328	0.0886964	no	chr5	139317053	139319033	+
circRNA11672	21.8487	25.0772	29.652	25.9489	20.5837	31.6167	33.7228	26.3342	35.011	23.1727	29.9715	24.6221	up	0.283636	0.0930153	0.209247	no	chr5	139318908	139319501	+
circRNA11673	11.1458	12.3035	13.8499	13.5016	14.124	20.8077	20.1669	14.3573	13.6782	21.8074	18.1635	12.985	up	0.484201	0.0363867	0.126162	no	chr5	140436104	140487060	+
circRNA11674	3.92558	4.43942	3.56413	4.44124	4.51996	6.02517	5.92488	4.06682	4.05203	6.60339	5.33446	4.17806	up	0.352507	0.0964208	0.213543	no	chr5	140440119	140459355	+
circRNA11675	6.91021	5.27343	7.89052	7.40627	11.4914	18.291	24.7663	8.80932	9.72684	24.5439	17.2275	7.79437	up	1.14421	0.0501637	0.147655	no	chr5	142873400	142932125	+
circRNA11676	59.3063	44.478	74.6595	61.4109	112.375	173.955	223.619	87.3264	81.421	225.492	158.363	70.446	up	1.16864	0.0470487	0.143372	yes	chr5	143147231	143166097	+
circRNA11677	7.72113	11.2185	12.4737	9.25054	9.52546	15.1065	16.5056	13.5001	15.5564	13.1087	14.7554	10.0379	up	0.555793	0.00225003	0.0452184	no	chr5	146160374	146171990	-
circRNA11678	1.67422	2.35212	2.42296	2.47864	2.25744	3.10828	3.38927	2.33365	4.13152	3.02972	3.19849	2.23707	up	0.515777	0.0259922	0.107195	no	chr5	146258449	146260898	+
circRNA11679	2.18357	2.63309	2.67346	2.3604	2.67224	3.31178	3.21896	2.46537	3.31742	2.95649	3.054	2.50455	up	0.286148	0.0241873	0.103745	no	chr5	146260745	146271058	+
circRNA1168	7.65108	8.5472	9.32952	7.1578	8.69703	6.99623	8.62681	9.74593	8.82819	9.29824	8.69908	8.27653	up	0.0718376	0.506982	0.644129	no	chr7	157201721	157231327	+
circRNA11680	8.37294	9.4569	9.69504	10.7726	9.86096	19.4089	15.5383	11.9719	15.017	14.1996	15.2271	9.63169	up	0.660784	0.00766171	0.0624821	no	chr5	149505483	149513209	-
circRNA11681	47.1596	47.3395	51.7889	49.6213	52.1414	96.7463	92.5379	94.9114	61.1858	95.164	88.1091	49.6101	up	0.828656	0.00426087	0.0520435	no	chr5	151060318	151063747	-
circRNA11682	8.25221	9.934	10.9091	9.59848	10.3483	15.5412	12.5247	9.57406	10.7164	12.5709	12.1854	9.80841	up	0.313069	0.0794555	0.190891	no	chr5	151786572	151800869	+
circRNA11683	1.42977	2.25536	1.9452	1.26122	1.67875	2.74365	2.97832	2.2212	1.86333	2.25378	2.41205	1.71406	up	0.492846	0.0312957	0.117232	no	chr5	154029489	154034946	-
circRNA11684	0.771896	1.42003	1.08787	0.74273	1.15131	1.94447	2.06468	1.1553	1.45388	1.23171	1.57001	1.03477	up	0.601468	0.0479378	0.144772	no	chr5	154033791	154034946	-
circRNA11685	36.3371	78.3824	109.73	40.8795	22.2905	16.6476	15.6538	10.6433	18.4136	20.506	16.3729	57.5238	down	-1.81285	0.0616086	0.164847	no	chr5	157330742	157361598	+
circRNA11686	12.5585	32.0688	17.3235	15.8045	57.163	13.6285	54.3714	19.4787	31.853	23.2188	28.5101	26.9836	up	0.079387	0.892115	0.9306	no	chr5	159073396	159099463	-
circRNA11687	18.9351	26.6772	23.6502	24.8188	22.5601	34.3556	29.3648	30.2667	31.2134	29.8795	31.016	23.3283	up	0.410933	0.00168953	0.0431772	no	chr5	160010500	160049662	+
circRNA11688	34.8758	50.7923	69.4118	47.2682	41.7214	87.3331	28.6273	17.488	26.6358	39.3051	39.8779	48.8139	down	-0.291704	0.538478	0.670275	no	chr5	168371424	168385414	+
circRNA11689	27.3311	33.3753	51.2613	36.2063	27.2567	48.2693	17.8096	12.7617	19.3562	24.0779	24.4549	35.0861	down	-0.520775	0.204508	0.349894	no	chr5	168399488	168406327	+
circRNA1169	3.02967	3.74508	4.51719	5.58805	3.62231	4.79056	5.73408	10.0866	8.81794	5.66237	7.01831	4.10046	up	0.775339	0.0440707	0.138855	no	chr7	158759486	158764853	-
circRNA11690	1.16805	1.87746	2.06929	1.16144	1.49034	3.21488	3.09292	3.04483	2.27566	2.43838	2.81333	1.55332	up	0.856929	0.00142634	0.0430384	no	chr5	168488602	168492847	+
circRNA11691	1.69952	1.90739	2.21378	2.05693	2.35806	4.15382	4.04843	3.37425	2.44603	3.38304	3.48111	2.04714	up	0.765942	0.00671483	0.0602079	no	chr5	168493894	168502105	+
circRNA11692	11.6771	12.2207	11.897	11.0361	19.7837	13.752	11.1778	12.2909	20.0599	7.3878	12.9337	13.3229	down	-0.0427773	0.886326	0.926511	no	chr5	168748302	168754007	-
circRNA11693	15.78	18.0649	18.7498	14.8997	17.7607	23.7941	21.0851	15.6241	16.641	20.8443	19.5977	17.051	up	0.200831	0.182725	0.324682	no	chr5	171868610	171900100	-
circRNA11694	5.66311	7.87395	7.2811	5.87094	8.08763	8.81568	9.60213	11.9818	8.36797	9.83777	9.72106	6.95535	up	0.482991	0.00932002	0.0671894	no	chr5	173108624	173123202	+
circRNA11695	28.8572	39.3599	19.9376	31.0809	17.7824	19.6165	15.4594	10.9379	8.16069	15.0851	13.8519	27.4036	down	-0.984281	0.0218372	0.0985159	no	chr5	173944967	173953272	+
circRNA11696	7.46106	8.59257	9.09668	7.223	9.48315	10.1971	9.27818	7.11151	9.14714	9.6789	9.08257	8.37129	up	0.11765	0.332655	0.483989	no	chr5	177191884	177239865	+
circRNA11697	4.34674	4.67312	5.10813	4.54573	2.93251	10.6286	7.81049	6.75449	8.49032	5.72268	7.88131	4.32125	up	0.866988	0.00931648	0.0671871	no	chr5	179593478	179594963	+
circRNA11698	6.7601	7.70809	8.08207	6.54109	6.46266	6.51467	7.12827	6.20322	6.22698	7.30033	6.6747	7.1108	down	-0.0913107	0.31199	0.464071	no	chr5	180264781	180280608	-
circRNA11699	12.9856	14.7138	12.3137	12.1495	16.3525	11.3885	14.7322	12.4851	11.0578	13.158	12.5643	13.703	down	-0.125157	0.306371	0.458533	no	chr4	2625262	2639859	+
circRNA117	7.59308	7.73306	8.49805	7.28813	11.1306	9.0055	8.97329	6.72636	13.0558	7.74375	9.10094	8.44859	up	0.107305	0.62711	0.740331	no	chr13	113520616	113539507	+
circRNA1170	9.34363	8.28304	9.84332	14.7318	9.35456	13.126	12.8392	18.9777	18.3482	13.5844	15.3751	10.3113	up	0.576375	0.0214647	0.0975753	no	chr7	158788004	158793726	-
circRNA11700	2.85213	2.98043	2.3437	1.88288	2.55734	2.09193	2.1809	2.60724	2.15662	2.6433	2.336	2.52329	down	-0.11127	0.440949	0.584934	no	chr4	2659558	2660054	+
circRNA11701	2.76514	4.05404	3.52588	2.90691	3.46826	2.80649	3.45248	3.51189	3.54042	4.0234	3.46694	3.34405	up	0.0520674	0.695702	0.794194	no	chr4	2662838	2672372	+
circRNA11702	2.88224	3.02815	3.12499	2.86455	3.62782	2.39786	2.89513	2.54982	3.49704	3.22241	2.91245	3.10555	down	-0.0926168	0.460002	0.601788	no	chr4	2949934	2954563	-
circRNA11703	11.153	12.9712	12.5033	12.3049	14.8274	12.24	15.3583	12.4389	13.8262	14.6766	13.708	12.752	up	0.104297	0.295875	0.448107	no	chr4	3186597	3199939	+
circRNA11704	3.65756	4.66251	3.81423	3.491	5.49331	2.09431	4.22945	4.09039	4.46881	3.31622	3.63984	4.22372	down	-0.214641	0.338369	0.489292	no	chr4	3316070	3343053	+
circRNA11705	10.7016	10.9498	11.6715	12.062	8.80231	19.859	31.9165	23.8309	13.1994	19.4138	21.6439	10.8375	up	0.997937	0.023477	0.10198	no	chr4	15052414	15054217	+
circRNA11706	9.26317	8.87936	9.15354	11.9617	10.6538	10.8436	19.5167	12.845	12.4906	15.1209	14.1634	9.98232	up	0.504718	0.0469663	0.143252	no	chr4	15612266	15640883	-
circRNA11707	9.16624	12.2222	12.3805	7.72133	11.121	9.26328	8.9964	7.21138	14.0713	7.94969	9.49841	10.5223	down	-0.147685	0.516633	0.652582	no	chr4	24819859	24838272	-
circRNA11708	3.35725	3.41881	3.39477	2.38503	3.29878	2.73913	2.95482	2.48632	3.50724	3.1905	2.9756	3.17093	down	-0.0917243	0.482425	0.62194	no	chr4	24831506	24838272	-
circRNA11709	13.9916	11.953	13.4092	13.1272	15.8153	14.6945	16.0381	16.6815	18.1957	14.8541	16.0928	13.6592	up	0.236535	0.0271853	0.109314	no	chr4	25333183	25351689	+
circRNA1171	5.79551	6.72385	6.81513	5.26555	5.6699	5.70507	8.33649	10.1195	9.22458	9.72618	8.62237	6.05399	up	0.510199	0.0275214	0.109875	no	chr7	158879684	158906091	+
circRNA11710	1.95168	1.48574	5.87844	2.09488	5.67905	15.5513	7.86054	9.56948	3.21217	14.1561	10.0699	3.41796	up	1.55884	0.0370355	0.127259	yes	chr4	25765326	25767830	-
circRNA11711	26.4424	29.7723	20.8018	37.0523	44.9717	33.1082	50.3598	32.4123	39.1415	46.37	40.2784	31.8081	up	0.34061	0.164129	0.302779	no	chr4	26919504	27003104	+
circRNA11712	2.67538	3.74308	1.92759	2.09324	6.13199	3.245	4.68783	1.93627	2.83067	3.47527	3.23501	3.31425	down	-0.0349149	0.932025	0.956371	no	chr4	37902003	37902512	+
circRNA11713	24.5414	24.4017	19.6428	17.3224	20.0859	11.4651	14.8217	10.6889	15.0207	15.3802	13.4753	21.1989	down	-0.653667	0.00274964	0.0470012	no	chr4	38035588	38054338	+
circRNA11714	2.51005	3.31857	3.9026	3.0103	2.57049	2.33053	2.87813	4.91972	4.47904	3.95748	3.71298	3.0624	up	0.277915	0.280403	0.431659	no	chr4	39224884	39228690	+
circRNA11715	3.27466	3.97328	3.99789	3.5256	4.8213	3.82934	5.06951	5.08758	4.38904	5.08315	4.69172	3.91855	up	0.2598	0.0677491	0.17394	no	chr4	39876993	39902460	-
circRNA11716	4.57121	4.53976	4.61993	4.46635	6.45433	4.56606	6.3352	6.24309	5.1202	6.02558	5.65802	4.93031	up	0.198619	0.196757	0.341118	no	chr4	39890249	39926861	-
circRNA11717	2.7292	2.9195	3.36134	3.53137	4.75078	3.33625	4.32186	4.6628	4.40088	4.43724	4.2318	3.45844	up	0.291153	0.110751	0.233337	no	chr4	39920319	39922748	-
circRNA11718	19.4645	19.0091	16.0785	16.95	17.8887	8.83332	22.3133	20.7036	40.4625	11.3793	20.7384	17.8782	up	0.214106	0.63619	0.747403	no	chr4	40821871	40830577	-
circRNA11719	53.8374	51.6047	47.7674	45.746	54.3377	26.6159	62.3827	59.96	116.251	37.7621	60.5944	50.6587	up	0.258375	0.556769	0.685346	no	chr4	40890364	41014398	-
circRNA1172	6.71975	8.55665	8.43121	6.38841	6.67019	6.93979	10.3173	11.9529	11.1215	11.6451	10.3953	7.35324	up	0.499483	0.024707	0.104851	no	chr7	158879684	158918869	+
circRNA11720	2.03441	2.7762	3.0034	3.62508	0.657848	0	0	0.034231	6.10525	0	1.2279	2.41939	down	-0.978454	0.405901	0.554336	no	chr4	46303460	46312716	-
circRNA11721	5.66258	12.0513	14.642	10.5362	10.3933	7.27158	10.7272	7.59948	9.02648	10.0646	8.93787	10.6571	down	-0.253809	0.329575	0.480783	no	chr4	47535509	47546862	+
circRNA11722	42.7461	42.4839	47.8286	51.5231	40.3196	41.1469	53.5101	55.0926	53.6297	37.9816	48.2722	44.9803	up	0.1019	0.455494	0.59768	no	chr4	48842636	48857365	+
circRNA11723	13.4867	11.7987	12.2567	10.9625	4.8345	0.0485949	0.309011	0.0869887	14.7842	0	3.04575	10.6678	down	-1.80839	0.0605304	0.163082	no	chr4	48998460	49007326	+
circRNA11724	7.64493	6.45837	8.15795	7.09625	8.07016	3.50254	4.93173	3.87945	6.79116	2.91977	4.40493	7.48553	down	-0.764987	0.00717714	0.0613035	no	chr4	52626018	52631144	-
circRNA11725	10.468	11.3302	13.4138	11.8584	12.5199	10.2287	12.1154	11.7914	14.2317	12.8474	12.2429	11.9181	up	0.0387988	0.705084	0.801258	no	chr4	53383773	53414722	+
circRNA11726	11.9288	13.336	15.7171	13.8187	15.9264	11.9718	14.7152	13.4455	15.5835	15.3495	14.2131	14.1454	up	0.00688732	0.948166	0.966739	no	chr4	53399730	53444103	+
circRNA11727	11.7241	11.5958	15.8409	13.0007	15.2232	11.1468	14.1802	12.6483	14.7408	14.0736	13.3579	13.4769	down	-0.0127968	0.916329	0.946328	no	chr4	53428027	53444103	+
circRNA11728	4.33495	3.8107	6.12721	4.20774	3.43957	2.26895	4.39114	3.70841	4.64692	3.47218	3.69752	4.38403	down	-0.245702	0.303001	0.455355	no	chr4	55458892	55459261	-
circRNA11729	3.45511	2.93322	3.487	3.17909	3.79084	3.72536	4.74007	5.94793	4.76155	4.15299	4.66558	3.36905	up	0.469714	0.02214	0.0992153	no	chr4	55892635	55896900	+
circRNA1173	13.7823	11.5097	12.7261	10.1873	15.5337	10.8542	7.87845	7.71481	6.58226	10.5464	8.71523	12.7478	down	-0.548639	0.0121127	0.0743863	no	chr6	1726416	1742586	-
circRNA11730	1.43593	1.37449	1.18542	1.80749	1.8341	1.42652	2.16208	1.35541	1.51614	1.97143	1.68632	1.52748	up	0.142718	0.460429	0.601993	no	chr4	55965644	56024614	+
circRNA11731	6.57384	8.53695	7.0502	9.20774	9.22785	9.62432	9.72375	8.88691	11.2451	10.3894	9.9739	8.11931	up	0.296799	0.0286052	0.112396	no	chr4	67489967	67509105	-
circRNA11732	10.3723	8.76422	8.4841	12.5503	8.21412	5.34642	6.09809	5.18018	6.32456	6.38699	5.86725	9.67702	down	-0.721879	0.00724053	0.0614081	no	chr4	70958874	70970024	+
circRNA11733	6.92027	5.09861	5.12349	18.439	4.73532	7.33484	9.43204	7.54342	4.08984	7.68219	7.21646	8.06334	down	-0.160085	0.771767	0.850066	no	chr4	71440616	71466577	+
circRNA11734	7.27583	4.56587	4.04279	17.1078	4.21262	7.48095	9.31683	7.18679	4.08805	7.70313	7.15515	7.44098	down	-0.0565115	0.917702	0.947289	no	chr4	71466444	71497692	+
circRNA11735	7.22287	4.69	4.06522	17.77	4.31902	8.00414	9.85652	7.69062	4.48946	7.80292	7.56873	7.61341	down	-0.00849132	0.987642	0.992121	no	chr4	71472699	71497692	+
circRNA11736	0.664502	0.443947	0.845314	0.87147	0.106856	0	0.104402	0.308592	0.218734	0.638699	0.254085	0.586417	down	-1.20662	0.103562	0.22376	no	chr4	72339494	72339693	-
circRNA11737	2.67624	3.64548	3.88266	3.06923	2.71366	2.81247	2.84396	3.61362	3.81583	3.18505	3.25419	3.19745	up	0.0253731	0.862417	0.910738	no	chr4	73085249	73097272	-
circRNA11738	3.92264	3.99229	4.03538	4.07532	3.83333	4.17122	3.51403	3.7546	3.88801	4.33895	3.93336	3.97179	down	-0.0140267	0.812246	0.878446	no	chr4	75967277	75982037	-
circRNA11739	2.37487	2.1513	2.64592	2.14089	2.41713	2.32575	3.22271	3.09003	3.4249	2.88994	2.99066	2.34602	up	0.35025	0.0224466	0.0998585	no	chr4	76130656	76132719	-
circRNA1174	5.97753	7.10514	4.90293	4.75802	6.95284	5.58266	4.83659	5.96057	5.75528	4.78785	5.38459	5.93929	down	-0.141454	0.35228	0.502361	no	chr6	4891713	4892379	+
circRNA11740	4.43001	5.3438	4.59956	2.19661	2.68239	2.45934	2.54917	4.06377	4.5232	2.58458	3.23601	3.85047	down	-0.250818	0.434919	0.579434	no	chr4	76256178	76263843	+
circRNA11741	14.9939	12.115	16.5026	12.0505	11.9316	10.4824	13.1936	9.58666	15.744	8.46139	11.4936	13.5187	down	-0.234128	0.250378	0.399698	no	chr4	76995781	76996539	+
circRNA11742	15.0422	15.4645	14.8456	16.042	13.9054	0.419303	6.05113	1.15999	7.31833	5.01356	3.99246	15.0599	down	-1.91537	0.000826644	0.0385381	yes	chr4	78237510	78245325	+
circRNA11743	2.55411	2.85176	3.00579	3.02197	5.20541	10.4243	8.17225	10.9866	2.85353	8.09445	8.10621	3.32781	up	1.28446	0.0260955	0.107321	yes	chr4	78826037	78872798	+
circRNA11744	1.31603	1.92708	2.38519	1.88012	2.1823	1.73628	1.70528	2.33935	1.73803	1.87758	1.8793	1.93814	down	-0.0444785	0.793162	0.865041	no	chr4	83416731	83448961	-
circRNA11745	6.80235	7.45343	9.16532	7.85492	6.99329	5.92577	7.93385	5.87329	6.65849	6.52842	6.58396	7.65386	down	-0.217231	0.093498	0.20997	no	chr4	84735043	84803467	-
circRNA11746	2.65661	2.96783	3.81188	3.51173	2.86288	2.65091	3.4409	2.64028	2.86481	2.90774	2.90093	3.16219	down	-0.124408	0.348102	0.498178	no	chr4	84782963	84803467	-
circRNA11747	1.86946	2.24849	2.26687	2.38637	1.98914	1.52227	2.45107	1.8477	2.01681	2.03861	1.97529	2.15207	down	-0.123657	0.356064	0.505783	no	chr4	84796521	84798108	-
circRNA11748	13.7544	13.7067	20.0328	15.6158	17.7905	12.0189	18.7783	13.3887	14.1372	15.3388	14.7324	16.18	down	-0.135224	0.412315	0.559609	no	chr4	84829004	84897010	-
circRNA11749	37.341	35.5668	53.0067	44.0807	46.0654	32.6086	45.4705	33.1963	35.6495	39.3526	37.2555	43.2121	down	-0.213981	0.171723	0.311543	no	chr4	84836929	84932363	-
circRNA1175	12.4453	12.4741	16.5517	11.034	16.0304	15.3385	14.5762	16.873	14.7145	14.4258	15.1856	13.7071	up	0.147782	0.261992	0.412296	no	chr6	7176655	7189322	+
circRNA11750	122.564	170	152.972	116.365	119.573	64.2711	83.3547	57.0646	67.6254	75.771	69.6173	136.295	down	-0.969215	0.00172086	0.0431772	no	chr4	85942066	85977691	+
circRNA11751	15.5556	17.1843	18.3412	10.9677	17.5697	4.684	7.66703	3.41723	14.3762	5.77567	7.18402	15.9237	down	-1.14831	0.00712863	0.0613035	yes	chr4	86672365	86689190	+
circRNA11752	7.24031	8.27539	10.6836	6.82297	8.17645	2.09684	3.71983	1.53346	7.27672	2.65524	3.45642	8.23974	down	-1.25332	0.0059311	0.0571428	yes	chr4	86701241	86717117	+
circRNA11753	5.71092	7.28957	10.6079	5.29186	8.1023	1.86072	2.86269	1.2492	5.61487	2.40421	2.79834	7.40052	down	-1.40306	0.0058203	0.0567948	yes	chr4	86716530	86722434	+
circRNA11754	161.493	163.46	186.96	205.003	191.354	159.544	167.98	200.125	242.596	209.761	196.001	181.654	up	0.109669	0.434041	0.578722	no	chr4	86948498	87047594	+
circRNA11755	23.3367	22.1743	29.2665	27.8968	25.323	20.9954	24.2051	31.2709	31.7847	25.8926	26.8297	25.5995	up	0.0677199	0.633672	0.745412	no	chr4	87089984	87115299	+
circRNA11756	6.27001	5.7839	6.70817	6.34547	5.43674	4.80093	4.79105	6.99911	6.35551	5.91729	5.77277	6.10886	down	-0.0816383	0.517179	0.653018	no	chr4	87108159	87115299	+
circRNA11757	4.40025	3.27136	4.16929	3.5634	2.89282	2.89063	2.28052	3.74111	2.80219	3.21561	2.98601	3.65942	down	-0.293397	0.106037	0.226932	no	chr4	87114367	87115299	+
circRNA11758	28.9693	30.4701	38.7358	26.233	27.0092	22.2241	22.8144	27.0472	28.1569	19.2651	23.9015	30.2835	down	-0.341428	0.0533015	0.15254	no	chr4	88019458	88043457	+
circRNA11759	4.5133	5.53107	6.20007	4.40933	4.47502	3.89558	4.5924	5.17788	5.38083	3.19349	4.44804	5.02576	down	-0.176173	0.318323	0.469855	no	chr4	88036220	88038501	+
circRNA1176	10.6531	11.5852	15.5786	9.76988	14.2468	13.4594	12.765	14.4618	12.3808	12.6835	13.1501	12.3667	up	0.0886099	0.530006	0.663384	no	chr6	7181124	7189322	+
circRNA11760	8.68462	9.48706	10.2426	7.83539	8.8173	6.95869	7.3247	8.85663	9.26449	7.55282	7.99146	9.0134	down	-0.173611	0.130609	0.260268	no	chr4	88036220	88052158	+
circRNA11761	7.52556	8.09637	8.8376	6.97668	7.82193	6.09715	6.33358	7.85732	8.24604	6.78325	7.06347	7.85163	down	-0.152616	0.173959	0.314531	no	chr4	88038251	88056267	+
circRNA11762	3.34275	4.3235	4.67004	3.76262	3.16174	3.15237	3.50436	4.68061	5.46102	3.06727	3.97313	3.85213	up	0.0446196	0.832705	0.891954	no	chr4	88051991	88068061	+
circRNA11763	6.30395	8.24399	6.81253	8.2517	9.27132	7.01956	9.90701	6.6482	10.0442	7.58163	8.24012	7.7767	up	0.0835083	0.62238	0.73696	no	chr4	88990973	89029649	-
circRNA11764	2.74026	3.16933	6.83121	2.7677	2.21601	0.0374355	0.068014	0.0670125	0.0949983	0.0138697	0.056266	3.5449	down	-5.97734	0.0139544	0.079599	yes	chr4	95148748	95152773	+
circRNA11765	21.152	20.1827	28.2999	26.2889	17.4572	19.8313	25.5753	22.29	20.9339	16.7007	21.0662	22.6761	down	-0.106242	0.535924	0.6681	no	chr4	99074914	99076923	-
circRNA11766	1.33849	0.965866	2.62994	0.894554	1.34086	1.27477	1.11759	0.844202	1.05924	0.82694	1.02455	1.43394	down	-0.484998	0.267088	0.417476	no	chr4	102905514	102949427	-
circRNA11767	8.3821	7.73683	9.27546	6.78011	7.39567	6.67626	9.55931	8.70717	11.4661	11.8008	9.64192	7.91403	up	0.284908	0.148899	0.2835	no	chr4	105259619	105261848	+
circRNA11768	7.79194	10.3341	14.002	8.5957	8.18288	0.158338	0.263701	0.0236198	20.6081	5.95679	5.40211	9.78132	down	-0.856508	0.34037	0.491061	no	chr4	105645188	105659365	+
circRNA11769	8.81273	8.83072	12.5522	9.76025	11.2997	8.92754	11.2322	13.4653	11.2299	11.5749	11.286	10.2511	up	0.138746	0.343448	0.493723	no	chr4	106171095	106236519	-
circRNA1177	12.952	13.2184	15.2642	14.7724	12.2734	1.56928	7.63096	7.50005	24.2745	0.0285006	8.20065	13.6961	down	-0.739952	0.271821	0.422242	no	chr6	7574086	7577042	+
circRNA11770	2.6569	4.25847	3.01176	3.20408	2.98498	3.23876	2.88581	3.16796	4.07606	3.12005	3.29773	3.22324	up	0.0329614	0.832853	0.891976	no	chr4	109462901	109463644	+
circRNA11771	37.9395	55.4649	38.2227	12.3921	7.26646	0.249665	0.229643	0.074137	0.0365269	0.599119	0.237818	30.2571	down	-6.99127	0.0285537	0.112274	yes	chr4	109940946	109999846	+
circRNA11772	15.9403	25.7281	17.7966	6.53023	3.26899	0.097231	0.124792	0.0196843	0.021149	0.277896	0.108151	13.8528	down	-7.001	0.0272358	0.109384	yes	chr4	109961863	109980975	+
circRNA11773	2.63893	4.14209	4.0895	2.76243	4.16687	5.41642	5.56975	5.75842	5.2067	5.06782	5.40382	3.55996	up	0.602117	0.00435613	0.0523037	no	chr4	121811583	121814047	+
circRNA11774	7.39821	8.20523	8.97267	7.71928	9.57694	6.33494	8.22188	8.7196	9.5087	8.04841	8.16671	8.37446	down	-0.0362424	0.761273	0.842308	no	chr4	122170615	122201126	+
circRNA11775	10.231	10.231	11.5493	9.29122	11.9159	8.34037	11.1512	11.1111	12.3626	10.1404	10.6211	10.6437	down	-0.00306461	0.978885	0.986465	no	chr4	122190000	122224677	+
circRNA11776	8.8192	9.75923	11.897	9.22592	10.591	7.90206	10.5934	10.821	10.7166	9.47626	9.90185	10.0585	down	-0.0226413	0.845752	0.90058	no	chr4	122279775	122318270	+
circRNA11777	1.28906	1.69816	1.82843	1.6474	2.39404	2.04105	2.61717	2.24137	2.15895	2.71941	2.35559	1.77142	up	0.411185	0.0330087	0.120617	no	chr4	127930683	127933093	-
circRNA11778	21.2771	24.4726	28.9703	16.9125	15.4757	1.75504	4.42292	3.80884	18.8219	2.42964	6.24767	21.4216	down	-1.77768	0.00609933	0.0576956	yes	chr4	140947654	140967873	-
circRNA11779	9.05912	10.1015	10.6557	9.4071	9.58917	6.93812	9.37955	11.9307	13.0978	8.58976	9.98719	9.76252	up	0.0328258	0.854124	0.906001	no	chr4	143415477	143440382	+
circRNA1178	1.46904	1.6175	1.53244	1.40358	1.86008	1.50298	1.57352	1.5855	1.24514	1.48622	1.47867	1.57653	down	-0.092451	0.359375	0.508889	no	chr6	12119890	12135892	+
circRNA11780	6.91933	6.78727	6.96574	7.33943	7.74919	8.32743	8.57469	9.56905	9.83043	8.32479	8.92528	7.15219	up	0.319512	0.00267118	0.0466751	no	chr4	143543509	143548140	+
circRNA11781	1.8889	1.69489	1.99999	1.68834	1.70177	1.0041	1.16078	1.46462	1.18652	1.48893	1.26099	1.79478	down	-0.509248	0.00212166	0.0451205	no	chr4	145885678	145892415	-
circRNA11782	2.84299	4.00612	6.09203	4.23357	6.24964	6.7124	9.17908	10.4765	6.25924	8.40834	8.20711	4.68487	up	0.808865	0.00890814	0.0654717	no	chr4	147857553	147875150	+
circRNA11783	76.5381	82.6089	52.4638	64.7124	46.6552	15.244	33.7527	34.2234	58.6876	12.3227	30.8461	64.5957	down	-1.06635	0.0145584	0.0812835	yes	chr4	148120158	148152613	-
circRNA11784	64.0364	71.5203	81.0108	63.9235	66.6504	54.1555	65.4895	59.2764	56.8695	75.9736	62.3529	69.4283	down	-0.155067	0.199158	0.343592	no	chr4	150467673	150590859	-
circRNA11785	17.0618	18.5488	20.4901	16.0437	15.8802	14.5198	15.7846	15.9472	14.8546	17.4703	15.7153	17.6049	down	-0.163807	0.105395	0.226172	no	chr4	150761783	150817257	-
circRNA11786	20.45	21.0909	26.5142	16.4061	16.4694	12.2107	16.7999	16.0858	15.0871	16.4923	15.3352	20.1861	down	-0.39652	0.0579966	0.159069	no	chr4	150870525	150893149	-
circRNA11787	9.48479	8.07666	8.91227	9.82981	11.6538	6.66733	7.43888	7.02876	9.03406	5.51406	7.13662	9.59146	down	-0.42651	0.0178109	0.0890332	no	chr4	151139775	151175674	-
circRNA11788	21.3445	23.6885	24.7314	20.3634	12.8904	12.4459	15.3977	26.2207	27.9002	14.0468	19.2022	20.6036	down	-0.101624	0.727699	0.818381	no	chr4	151482524	151638756	+
circRNA11789	16.3049	25.5272	22.9584	12.3477	11.4203	3.19155	6.64314	7.53596	13.9457	6.59593	7.58245	17.7117	down	-1.22397	0.0196215	0.0933609	yes	chr4	153270335	153296036	+
circRNA1179	42.8659	45.5406	40.1246	51.4131	45.5772	45.3397	49.5189	47.9256	38.6568	46.4358	45.5754	45.1043	up	0.0149893	0.862996	0.911169	no	chr6	15374117	15410365	+
circRNA11790	24.0028	39.486	37.3322	19.152	18.297	5.19533	10.8743	12.6649	24.0086	11.1121	12.771	27.654	down	-1.11461	0.0293056	0.113705	yes	chr4	153270335	153315999	+
circRNA11791	11.9952	13.6353	13.322	7.72949	4.63566	2.78867	3.22416	3.98977	9.75321	2.26989	4.40514	10.2635	down	-1.22027	0.0317057	0.118219	yes	chr4	153315485	153315999	+
circRNA11792	0.592964	0.460048	1.05308	1.52708	1.98702	0.602093	0.539438	40.1687	2.51327	6.67277	10.0993	1.12404	up	3.16749	0.303143	0.455486	no	chr4	154239170	154322488	-
circRNA11793	1.18455	0.19302	0.490037	0.615712	0.650427	0.449714	0.544704	1.56532	0.237754	0.323978	0.624295	0.626749	down	-0.00565965	0.993483	0.996224	no	chr4	154366210	154377444	-
circRNA11794	3.58	5.70985	5.74323	2.94236	6.65398	5.89839	12.2592	9.05613	7.89019	6.0313	8.22705	4.92588	up	0.739992	0.0484799	0.145377	no	chr4	155696756	155717302	+
circRNA11795	3.96726	6.99569	6.91646	3.52658	7.64015	7.22649	14.773	12.3765	8.63167	7.23594	10.0487	5.80923	up	0.790594	0.0481997	0.145248	no	chr4	155713098	155722192	+
circRNA11796	7.93531	6.81544	7.20386	7.53546	2.64546	5.38372	4.78929	6.01705	3.18898	6.61436	5.19868	6.42711	down	-0.306024	0.314422	0.466304	no	chr4	165100628	165103096	-
[truncated: 18,822 more rows]
